# Supplementary material
Source: publisher figshare collection journal article supplement (https://gsajournals.figshare.com/ndownloader/files/14597288)
Supplement: Supplementary file 1 [file 14597288]

## Sheet: asl
Symbol	logFC	logCPM	PValue	FDR	asl_rep1	asl_rep2	asl_rep3	yw_rep1	yw_rep2	yw_rep3
Cyp4p2	7.68341	7.60918	0	0	22	47	22	6245	7423	6012
CG34138	-5.81993	5.64533	1.80961e-277	1.24401e-273	1628	1558	1580	33	30	25
CG17352	-4.95193	7.30958	4.94062e-255	2.26428e-251	5584	4367	5043	193	202	112
Syt4	7.26869	5.94353	2.43673e-246	8.37565e-243	8	17	13	1736	2274	2134
Cyp4p1	7.48958	5.09713	5.29604e-245	1.45631e-241	7	8	3	1103	1344	990
CG15236	7.38126	5.39833	1.83255e-227	4.19929e-224	7	14	3	1291	1399	1509
miple	-4.41821	6.08547	4.15039e-204	8.15196e-201	2193	2089	2008	118	91	98
GstZ1	6.04779	4.0824	2.16541e-180	3.72153e-177	11	6	7	605	581	488
l(2)03659	-5.19073	4.70254	5.70755e-175	8.71923e-172	894	825	744	16	32	22
Cyp6a17	-5.62412	3.91803	1.07565e-163	1.47892e-160	547	446	450	11	7	12
CG31918	3.21203	6.55735	1.0641e-153	1.33003e-150	322	297	271	2676	3063	2832
CHKov1	4.53456	4.8766	9.20401e-143	1.05455e-139	40	42	35	1121	929	792
mthl6	-11.0186	4.81952	6.71307e-140	7.09984e-137	846	698	1188	0	1	0
CG6701	3.07538	6.96097	5.69175e-129	5.5897e-126	580	329	394	3820	3823	3608
Ac76E	-4.47559	3.61751	2.56196e-123	2.34829e-120	436	355	352	18	18	17
CG5195	-5.0912	4.06977	3.56443e-120	3.06296e-117	647	395	557	16	16	16
CG31477	-3.8587	4.66308	1.38669e-117	1.12151e-114	814	729	759	75	54	37
CG12224	-6.25144	2.84366	1.16442e-95	8.89422e-93	239	200	246	1	5	3
CG4562	-4.42767	3.13619	6.1475e-95	4.44853e-92	310	238	268	18	9	12
Spn42De	5.94268	2.62223	8.86006e-92	6.09085e-89	5	1	3	200	214	183
CG5697	-7.15791	2.65141	4.30509e-88	2.8186e-85	268	162	178	1	2	1
CG11966	-6.52444	2.77125	5.50741e-85	3.44188e-82	222	186	244	1	1	5
CG17124	-3.09584	4.49153	4.98443e-73	2.97961e-70	803	579	590	110	70	59
Ac3	2.98141	5.63308	2.83532e-72	1.62428e-69	180	186	172	1249	1487	1670
CG42708	-4.28943	2.81419	5.52683e-72	3.03953e-69	281	178	193	11	13	10
CG4822	-4.97409	2.96695	2.69979e-69	1.42767e-66	235	242	253	15	2	7
CG6330	-3.95745	4.5073	2.58927e-68	1.31851e-65	1022	577	519	61	42	36
CG3259	-3.01819	3.55227	4.48857e-67	2.20405e-64	346	318	346	49	43	38
CG3552	-1.98172	5.83788	1.08861e-66	5.16116e-64	1537	1397	1491	362	414	391
CG31436	3.85178	2.67603	1.96302e-66	8.99651e-64	14	9	16	197	214	179
Ddc	-3.92342	2.66783	1.73863e-65	7.7111e-63	214	166	196	12	10	17
Ir76a	3.54045	4.24311	1.91054e-65	8.20875e-63	58	38	49	457	692	595
unc-13-4A	9.91168	1.92117	2.16814e-65	9.03324e-63	0	0	0	143	108	116
CG32681	3.45263	2.98921	3.89819e-64	1.57636e-61	22	20	21	275	248	200
Arc1	-2.24243	5.58817	3.49921e-63	1.37459e-60	1376	1294	1184	307	339	210
CG30345	-5.04529	2.79038	1.17016e-62	4.46903e-60	302	189	165	10	4	6
CG32686	4.27322	2.64921	6.27409e-62	2.33142e-59	13	8	8	237	183	169
CG14985	-2.24102	4.31831	2.64252e-61	9.56107e-59	588	497	515	136	109	107
CG32318	-1.70788	5.74901	5.52193e-61	1.94669e-58	1490	1292	1224	431	431	412
CG34215	6.68352	1.89655	6.55552e-61	2.2533e-58	2	0	1	112	119	126
CG7366	3.60996	2.96452	1.72034e-60	5.76901e-58	18	15	23	219	251	243
CG6071	-2.65866	3.687	3.56648e-58	1.16751e-55	368	353	354	62	67	49
CG17341	-9.61392	1.60362	1.17285e-57	3.71863e-55	126	78	86	0	0	0
CG9192	-3.67092	3.3687	1.19005e-57	3.71863e-55	321	346	258	26	32	18
CG3280	4.09358	2.34198	2.4014e-56	7.33709e-54	5	12	9	174	161	135
hig	6.95524	1.67241	3.21037e-55	9.59551e-53	0	0	2	94	118	93
CG40160	1.51918	7.33342	2.29918e-54	6.72582e-52	1489	1305	1261	4321	4065	3718
Cpr64Aa	2.40353	5.52737	3.53802e-54	1.01342e-51	245	222	242	1111	1315	1456
Tret1-1	-3.12487	3.2685	4.71194e-54	1.32213e-51	331	280	229	34	43	23
Klp54D	7.99731	1.9124	9.04338e-54	2.48675e-51	0	1	0	158	117	90
CHKov2	2.80678	3.32243	4.67148e-51	1.25938e-48	38	48	33	289	299	282
CG7510	2.33722	4.2022	1.80785e-49	4.78003e-47	138	71	88	531	516	494
Ugt86Di	-1.51491	6.12181	3.83116e-47	9.9386e-45	1981	1483	1581	671	632	529
krimp	2.42132	3.45037	4.53044e-47	1.1535e-44	61	43	61	292	341	286
CG43295	3.38896	2.57463	1.53589e-46	3.83944e-44	18	15	16	163	180	191
CG5830	1.38297	7.09933	1.82881e-46	4.49004e-44	1413	1101	1193	3468	3480	3086
UK114	-4.19452	2.39538	1.48087e-45	3.57202e-43	148	182	147	9	7	11
CG7900	-2.01342	4.10492	4.96147e-44	1.17613e-41	521	419	403	139	116	91
CG32088	-3.26581	2.14078	1.33307e-43	3.1065e-41	152	108	124	12	15	14
CG41520	2.66763	4.13562	4.68582e-43	1.07376e-40	92	46	94	496	505	517
Psf1	-1.63652	4.99181	7.99373e-43	1.80174e-40	850	712	778	275	285	225
CG10527	-1.63293	6.59093	5.06203e-42	1.12255e-39	2660	2307	2130	695	895	785
Mgstl	-1.65172	6.44537	2.67761e-41	5.84356e-39	2458	2017	1973	681	887	575
CG3961	-1.68802	4.69712	4.0262e-41	8.64941e-39	793	573	571	197	231	193
CG2898	4.24158	1.62153	5.30536e-41	1.12221e-38	6	4	4	109	92	81
wun2	-1.81481	4.57803	1.66552e-40	3.46957e-38	728	550	539	215	176	145
CG5022	-4.80436	1.84864	8.7889e-40	1.80356e-37	104	90	137	3	3	6
Ets21C	-3.25093	1.90415	1.05607e-39	2.13528e-37	126	95	103	12	14	9
CG3434	-1.4856	6.27995	1.23683e-39	2.46452e-37	1887	1751	1907	706	744	623
CG9903	4.58771	1.34427	2.15736e-39	4.23737e-37	6	2	1	82	81	70
CG15661	-3.45707	1.91767	6.91524e-38	1.33912e-35	116	116	98	8	12	11
CG3437	-1.35264	5.59809	6.1009e-36	1.16502e-33	1188	1096	1091	489	498	396
AcCoAS	-2.89844	4.94271	1.11426e-35	2.09863e-33	1343	826	524	125	137	106
CG16863	2.77963	2.28929	1.01589e-34	1.8875e-32	15	23	20	148	151	120
CG15086	-6.92379	0.811003	1.4685e-34	2.69206e-32	62	56	43	1	0	0
Fps85D	1.24466	7.81926	1.19862e-33	2.16839e-31	2691	1799	2091	5483	6138	4532
Tequila	1.94646	3.58401	1.83466e-33	3.27595e-31	86	83	68	311	319	319
CG1909	2.08483	2.88951	2.05431e-33	3.62112e-31	54	39	42	196	215	184
CG10126	-2.34929	4.51206	3.75926e-33	6.54255e-31	860	587	432	145	139	96
PGRP-LC	-2.19148	2.6527	3.96465e-33	6.81375e-31	193	151	154	38	44	31
asl	1.23728	6.04475	4.99256e-33	8.47441e-31	720	588	605	1549	1686	1451
CG4267	-4.49279	1.95508	3.51943e-32	5.90105e-30	159	126	72	9	3	4
Cyp6a23	-5.2956	0.868549	2.18593e-31	3.621e-29	62	58	45	3	0	1
CG16718	-1.20016	5.98683	3.45224e-31	5.65058e-29	1688	1339	1288	707	643	597
GstE6	-2.3856	2.50395	8.64103e-31	1.39771e-28	150	151	155	32	31	28
PGRP-LA	-2.71671	1.96825	1.09649e-30	1.75298e-28	114	94	116	18	17	16
CG42562	5.50138	0.794121	1.4167e-30	2.23888e-28	0	1	2	50	56	52
norpA	1.30114	7.02857	1.95078e-30	3.04787e-28	1473	1141	1071	3155	3002	3199
GstE1	1.94841	4.10673	4.90743e-30	7.58115e-28	123	96	123	384	521	464
sec31	1.08999	8.27556	6.89762e-30	1.05373e-27	3883	2679	3149	7704	7396	6298
CG44085	-1.65192	4.06377	6.99242e-30	1.05647e-27	506	385	347	157	135	116
CG5455	-2.42431	2.75909	8.07786e-30	1.2072e-27	222	180	150	43	26	37
CG33217	-1.31387	7.56592	9.47682e-30	1.40104e-27	4442	4188	4452	1662	1967	1857
Calx	-4.50672	0.86073	1.77002e-29	2.58893e-27	58	49	54	2	2	3
CG2233	3.06976	1.61889	3.47482e-29	5.02898e-27	9	7	14	99	88	78
Scgdelta	-1.3064	5.47556	7.83848e-29	1.12262e-26	1079	983	1010	501	441	359
Cpr31A	2.74723	2.01759	9.39799e-29	1.33209e-26	17	10	22	132	109	103
phr6-4	-1.42851	4.23717	1.40659e-28	1.97339e-26	518	414	406	162	186	167
CG13679	3.75509	1.19039	1.13578e-27	1.57736e-25	2	2	10	70	74	58
mthl10	1.15763	6.14845	1.49073e-27	2.04961e-25	820	655	664	1594	1745	1604
CG10151	1.82275	2.90675	2.61117e-27	3.55456e-25	63	48	47	196	199	185
CG4686	-1.10479	5.77064	4.24669e-27	5.72429e-25	1387	1112	1134	554	622	574
CG7916	5.67022	0.961139	7.07063e-27	9.43826e-25	0	2	1	80	63	37
CG15905	2.26425	7.22234	1.57129e-26	2.07728e-24	1159	550	843	5882	3935	2831
Mmp1	-1.36275	6.58	3.02958e-26	3.96702e-24	2911	1982	1888	1091	889	744
TwdlM	3.82158	1.13233	6.20938e-26	8.05403e-24	9	1	3	54	74	66
CG31705	1.42706	5.1404	6.68008e-26	8.58359e-24	360	294	275	1056	856	694
CG31098	-2.1747	2.9207	6.96186e-26	8.86284e-24	237	196	167	37	64	37
CG11880	-1.34036	4.6459	2.19215e-25	2.76512e-23	696	525	531	285	232	201
side	3.53635	2.42337	2.34297e-25	2.9285e-23	1	1	0	0	1	1
CG3837	1.14045	5.59446	3.60992e-25	4.47142e-23	586	465	419	1165	1102	1084
dream	3.07947	1.32289	5.547e-25	6.80944e-23	8	7	9	84	69	61
CG14907	-1.59069	3.20161	1.3473e-24	1.63929e-22	253	211	204	75	80	75
Caps	-2.15812	2.99038	1.7599e-24	2.12253e-22	196	204	223	38	59	49
Ptr	2.11839	3.02293	4.01453e-24	4.79964e-22	71	40	36	245	192	218
CG14830	-1.05991	6.62673	4.08028e-24	4.83618e-22	2290	2007	2186	1056	1165	1021
CG3523	-1.49631	7.36871	5.30714e-24	6.23657e-22	5590	3560	2936	1371	1481	1507
CG3397	-6.27179	0.222051	1.09673e-23	1.27788e-21	45	31	27	0	0	1
ImpL2	-1.55985	5.04169	1.89555e-23	2.19007e-21	1026	767	619	333	303	213
Ilp8	-4.17926	2.24042	2.07194e-23	2.37392e-21	228	139	69	6	9	9
GstE8	-1.92419	2.62774	2.21226e-23	2.51375e-21	160	161	148	50	42	37
CG17018	2.20783	2.1484	3.24979e-23	3.6624e-21	27	23	24	141	123	94
swi2	1.42174	4.36159	6.65614e-23	7.44027e-21	181	166	191	461	539	501
gogo	-2.47196	2.28053	1.37448e-22	1.52401e-20	139	96	160	26	30	18
CG33306	7.99702	0.128699	2.45147e-22	2.69642e-20	0	0	0	40	25	32
CG32572	2.43859	1.78702	2.57505e-22	2.80987e-20	18	15	17	89	91	102
CG7546	-0.932498	8.34093	5.21033e-22	5.6407e-20	8387	6050	6424	4226	3827	3271
CG43144	-2.11776	2.5486	5.3996e-22	5.79993e-20	152	130	174	36	32	41
CG31999	1.16666	4.50258	5.54001e-22	5.8592e-20	246	198	232	574	544	463
CG42351	4.22704	0.868795	5.50148e-22	5.8592e-20	5	0	3	67	63	33
CG4210	-1.28341	5.06314	1.3491e-21	1.41498e-19	830	770	698	288	374	321
CG42855	-2.4453	2.2758	1.35848e-21	1.41498e-19	164	124	106	29	14	31
Cyp4d2	1.32723	4.34954	1.95938e-21	2.02553e-19	209	168	185	441	578	448
CG5731	1.16401	5.55877	2.18744e-21	2.24441e-19	472	413	521	1225	1112	961
Damm	-3.0739	1.39194	2.71672e-21	2.76683e-19	66	72	82	4	11	12
CG14598	1.26245	4.65218	2.91235e-21	2.94425e-19	280	222	216	669	665	464
Cyp4d14	1.85675	3.20216	3.21306e-21	3.22455e-19	54	60	75	219	262	236
asparagine-synthetase	-1.30616	5.32506	4.11002e-21	4.09483e-19	902	997	852	432	419	322
CG14207	-0.934318	6.87023	4.6257e-21	4.57545e-19	2992	2244	2281	1471	1362	1239
CG8997	4.61579	0.347063	5.71196e-21	5.60955e-19	2	2	0	46	35	30
CG9747	1.39709	4.79121	6.72371e-21	6.55634e-19	302	195	246	765	758	513
CG5707	-6.03546	0.0094824	8.11867e-21	7.86082e-19	34	28	25	0	0	1
CG13654	3.90707	0.587973	8.85997e-21	8.51858e-19	3	3	2	54	37	39
CG14879	-1.9253	2.7644	1.22839e-20	1.17286e-18	204	182	133	46	57	39
Pde9	1.66046	4.88187	1.4296e-20	1.35555e-18	295	142	258	865	754	644
CG9279	-1.99014	1.95519	2.3645e-20	2.22668e-18	117	84	95	26	29	22
phr	0.976473	6.89314	3.12029e-20	2.91842e-18	1396	1197	1297	2525	3003	2452
CG32281	-1.13969	4.13648	5.14646e-20	4.78099e-18	444	365	366	194	203	158
CG9961	-3.47676	0.651876	7.50509e-20	6.92534e-18	51	47	34	4	6	2
Wwox	-1.19226	4.84498	7.85153e-20	7.19671e-18	702	564	676	283	305	294
ltl	0.923679	6.83527	1.09368e-19	9.95826e-18	1437	1080	1326	2640	2591	2336
SPE	1.89126	2.35216	1.4767e-19	1.33573e-17	47	29	27	154	136	107
CG33978	0.87443	9.18581	2.30086e-19	2.06762e-17	7096	6074	6802	12658	13356	12118
Cyp4e2	-1.41499	4.70791	3.05755e-19	2.72976e-17	749	547	562	318	230	177
CG6231	1.83394	2.15204	3.63294e-19	3.22254e-17	39	25	28	113	115	112
Arr2	2.48631	1.3421	3.96908e-19	3.49814e-17	11	14	10	77	67	62
CG32055	-2.15467	2.17008	4.68401e-19	4.10194e-17	137	82	134	31	31	20
CG5590	0.92195	6.46523	4.9958e-19	4.3473e-17	1111	909	951	2127	2117	1631
CG34411	3.23228	2.28874	5.37341e-19	4.64648e-17	19	10	15	217	145	75
IntS12	1.1605	4.52783	5.49352e-19	4.72065e-17	272	192	229	496	612	497
CG13045	2.57303	1.73224	7.47922e-19	6.38707e-17	15	17	12	116	100	61
Dscam	1.05721	6.32246	7.65156e-19	6.49391e-17	1035	723	786	2174	1718	1587
Cap-H2	1.02468	7.25383	1.02001e-18	8.60374e-17	1763	1474	1652	3120	3650	3542
l(2)34Fc	1.53193	2.95747	1.14153e-18	9.57005e-17	64	65	61	179	210	184
CG15080	1.73972	3.75711	1.57684e-18	1.31394e-16	132	107	63	343	348	348
CG13685	2.13125	2.3339	1.81145e-18	1.49136e-16	40	28	21	163	109	131
upd2	-3.12993	1.11532	1.80878e-18	1.49136e-16	91	50	42	6	7	8
CG13284	2.50656	1.72663	2.14655e-18	1.75672e-16	17	14	15	109	68	95
CG14314	-1.30336	4.16712	2.17482e-18	1.76933e-16	453	337	452	187	199	139
HPS4	0.90572	5.43745	2.30443e-18	1.86374e-16	560	450	457	978	974	899
Cpr66D	1.21027	4.31468	2.4088e-18	1.93676e-16	241	147	197	447	511	439
CG42561	2.80552	0.976023	2.78391e-18	2.22535e-16	6	8	8	52	54	56
ox	-0.974729	5.97595	3.51854e-18	2.79632e-16	1634	1241	1206	838	726	593
puc	-0.854842	5.6323	3.87371e-18	3.0609e-16	1209	913	996	612	615	559
CG18577	7.77445	-0.0577187	4.16686e-18	3.27372e-16	0	0	0	26	41	17
CG8172	2.54473	1.38441	4.60786e-18	3.59963e-16	15	12	8	61	91	62
CG4382	1.30198	6.77572	5.79844e-18	4.50411e-16	1236	748	1117	3322	2551	2064
mago	-0.860839	7.00069	7.52822e-18	5.81491e-16	2997	2527	2518	1498	1705	1406
CG15673	-3.26716	0.47447	9.16521e-18	7.0398e-16	42	36	36	5	6	1
CG43333	-1.16616	4.30975	1.38501e-17	1.05792e-15	524	390	423	251	200	168
CG3588	-7.51615	-0.331357	1.67068e-17	1.26907e-15	25	17	25	0	0	0
CG13117	-1.797	2.97553	2.92713e-17	2.19919e-15	262	164	169	78	61	38
Gyc-89Da	3.03749	0.654626	2.92711e-17	2.19919e-15	7	2	6	42	43	45
CG32640	-0.959004	7.23114	2.96452e-17	2.21517e-15	3796	3057	2840	1960	1887	1356
St3	-2.04405	2.10013	3.31735e-17	2.46542e-15	118	119	92	20	37	26
CG3714	-0.866824	5.42802	3.40851e-17	2.51955e-15	1046	792	875	546	537	461
magu	0.750693	8.07073	4.28906e-17	3.15349e-15	3804	2938	3052	5742	6091	5253
CG32850	0.901649	5.62483	4.43904e-17	3.2464e-15	616	513	542	1024	1237	989
Tg	-1.83864	2.39563	5.29469e-17	3.85168e-15	173	123	101	32	43	39
CG4984	1.45361	2.89987	6.43114e-17	4.65378e-15	84	48	60	175	195	173
CG17816	1.31105	3.65796	1.07749e-16	7.75624e-15	127	100	122	357	282	263
CG42363	-1.96893	1.97768	1.49847e-16	1.07304e-14	101	103	94	30	19	30
CG42362	-1.96893	1.97768	1.51268e-16	1.07761e-14	101	103	94	30	19	30
Faa	1.76957	2.10683	1.93803e-16	1.3735e-14	35	26	31	96	123	107
Obp56a	1.89901	3.5947	2.94138e-16	2.0739e-14	65	96	80	401	327	231
CG17839	-3.20688	0.423513	3.27548e-16	2.29768e-14	35	35	39	2	7	3
mag	-3.41437	0.375059	3.4077e-16	2.3783e-14	46	26	35	2	3	5
CG17600	0.939707	4.59193	4.11452e-16	2.8571e-14	315	240	248	532	581	485
Muc68Ca	2.27725	1.86815	4.18281e-16	2.88992e-14	19	23	16	122	75	97
Cht5	1.75896	5.4292	5.52297e-16	3.79677e-14	425	207	336	1610	1009	770
Pvf2	-1.19182	4.76536	6.00665e-16	4.10873e-14	731	561	554	353	261	226
plx	-1.24488	4.81999	6.59136e-16	4.48637e-14	782	584	575	275	247	318
Edg78E	-3.5473	0.489012	8.06065e-16	5.4594e-14	59	27	32	7	2	1
CG3788	-1.03347	4.82804	8.33162e-16	5.61526e-14	743	562	558	364	300	279
CG13890	0.88741	5.24043	9.91661e-16	6.6509e-14	457	393	435	850	899	732
Sema-1a	1.38841	4.64887	1.03066e-15	6.87893e-14	294	200	184	747	493	584
nAcRbeta-21C	-3.99032	-0.00593117	1.11164e-15	7.38357e-14	32	24	26	0	4	1
CG14997	0.764088	6.90082	1.13599e-15	7.50903e-14	1615	1320	1378	2651	2672	2297
CG15449	-1.38286	2.69052	1.24e-15	8.15727e-14	160	146	142	62	66	51
CG32248	4.87396	-0.214233	1.91861e-15	1.25614e-13	0	0	2	27	27	18
CG31547	1.48985	2.82738	2.11386e-15	1.37742e-13	67	50	61	149	202	168
CG6357	1.96896	4.20438	2.17723e-15	1.41201e-13	153	82	130	702	487	302
CG34423	-2.80326	0.553837	2.79168e-15	1.80201e-13	49	30	38	5	6	6
CG7328	1.86392	1.80495	2.96044e-15	1.90202e-13	23	24	23	107	86	74
rut	0.979471	5.65034	3.32463e-15	2.12607e-13	736	478	448	1268	1121	985
CG31076	2.97198	0.764191	5.33052e-15	3.39302e-13	6	6	5	39	43	58
Ir85a	2.32457	1.04674	5.36922e-15	3.40191e-13	10	11	10	62	50	51
CG9436	-0.858562	5.07703	7.28511e-15	4.59463e-13	835	640	648	415	433	366
InR	0.806754	6.54073	8.35446e-15	5.245e-13	1225	1016	1054	2263	1970	1770
Cpr76Bc	-7.24095	-0.567556	8.52748e-15	5.32929e-13	17	18	20	0	0	0
CG10445	-1.05971	4.61043	1.03965e-14	6.46796e-13	577	452	574	243	308	249
Tsp	0.865428	6.744	1.4603e-14	9.04399e-13	1513	1009	1203	2679	2438	1920
LamC	-1.29232	6.38524	1.77996e-14	1.09743e-12	2295	1854	1651	589	933	912
Cyp316a1	-4.8402	-0.329985	1.81349e-14	1.11311e-12	22	24	19	1	1	0
Aprt	-1.08645	3.98564	2.05445e-14	1.2554e-12	395	354	295	178	173	160
CG32641	-0.894103	6.27311	2.44786e-14	1.48918e-12	1929	1551	1431	1039	998	719
CG10089	1.40309	2.90414	2.49654e-14	1.51211e-12	79	49	69	212	166	162
Kebab	0.901409	4.5893	2.62355e-14	1.58207e-12	303	231	280	536	553	490
CG17841	-0.864358	5.13289	2.86732e-14	1.71403e-12	838	664	704	473	439	350
Gadd45	-1.00097	3.95019	2.86007e-14	1.71403e-12	374	293	333	178	170	170
CG42806	-0.819009	6.77706	3.24814e-14	1.93328e-12	2436	2249	2108	1292	1526	1206
Mal-B2	2.22311	1.58308	4.33592e-14	2.56959e-12	20	16	13	57	100	81
yellow-b	-0.919726	5.17565	4.8135e-14	2.84038e-12	849	766	681	410	490	367
spen	1.0351	8.00228	5.77208e-14	3.39147e-12	3617	2526	2141	6994	5183	5280
CG42238	1.19181	7.42351	6.13409e-14	3.58883e-12	1558	1355	2132	3650	4501	3916
CG31769	-4.7636	-0.387395	1.11389e-13	6.48933e-12	25	22	15	1	0	1
Nf1	0.90404	6.12178	1.28917e-13	7.47879e-12	1003	705	671	1700	1414	1467
CG43103	-3.37192	0.0521759	1.66175e-13	9.59978e-12	31	29	23	1	5	2
moody	-1.39553	3.88922	1.75451e-13	1.00932e-11	465	312	275	158	110	141
toe	0.936086	5.16514	1.99917e-13	1.14527e-11	454	314	431	786	912	687
CG13516	1.50856	3.5651	2.18861e-13	1.2486e-11	75	109	107	284	329	264
CG14683	-0.742717	6.93864	2.36376e-13	1.34295e-11	2774	2385	2314	1628	1719	1317
Gasp	0.797846	7.47621	2.43228e-13	1.37619e-11	2240	2058	2009	3470	4100	3835
Gbs-76A	0.832847	5.24934	2.80078e-13	1.57819e-11	563	376	400	890	840	733
vkg	0.882766	6.0168	2.97963e-13	1.67212e-11	969	684	583	1451	1458	1333
CG1674	1.30732	3.40949	3.23078e-13	1.79838e-11	128	82	86	314	232	212
GABA-B-R2	0.985699	4.06168	3.22623e-13	1.79838e-11	217	173	153	360	392	361
CG5096	-1.59569	2.48448	3.79797e-13	2.09758e-11	129	112	161	43	55	41
Cht7	-1.06021	6.85798	3.79881e-13	2.09758e-11	2903	2453	2285	1017	1324	1432
CG30187	-1.01361	4.5107	4.81e-13	2.6453e-11	508	518	446	247	263	251
Ance-2	-3.82878	-0.141588	5.00072e-13	2.73924e-11	26	29	18	1	2	2
ana2	0.893969	5.29738	5.11219e-13	2.78919e-11	490	409	436	767	1007	807
PGRP-SA	-1.88443	1.33738	5.14491e-13	2.79594e-11	77	54	56	15	16	21
CG5835	-1.0198	3.60305	5.23173e-13	2.83193e-11	294	243	251	153	143	109
l(3)neo38	0.969167	6.61083	5.43134e-13	2.92845e-11	1456	968	834	2466	2061	2017
LRP1	0.876594	7.54448	5.59184e-13	3.00321e-11	2658	1776	2031	5060	3815	3410
CG42272	0.79598	4.6876	5.69264e-13	3.04545e-11	340	281	292	565	585	499
Cda5	1.72688	4.15548	5.97497e-13	3.1841e-11	162	158	80	376	474	514
Gpo-1	-1.03213	3.73131	6.09501e-13	3.23553e-11	334	280	251	138	164	137
GS	-0.719644	7.89527	6.41663e-13	3.39316e-11	5913	3858	4781	3105	3172	2833
CheB42c	1.31837	2.88062	8.96953e-13	4.72498e-11	80	58	64	197	150	174
Dif	-1.44457	3.25878	9.15408e-13	4.8038e-11	264	244	169	81	82	94
Obp99a	-1.15862	4.4636	9.91613e-13	5.18391e-11	588	467	430	189	301	201
CG42326	2.7742	1.73855	1.03729e-12	5.40218e-11	11	17	11	53	135	94
Cyp4d8	-3.03834	0.285831	1.08672e-12	5.63823e-11	31	24	42	2	7	3
Cyp304a1	7.15686	-0.594169	1.45439e-12	7.51742e-11	0	0	0	10	25	19
amd	-1.01604	3.52389	1.46324e-12	7.53487e-11	306	205	238	131	139	113
CG33170	-0.764907	6.13925	1.77976e-12	9.13057e-11	1516	1351	1437	869	921	849
CG1600	1.01607	6.89567	2.21229e-12	1.13073e-10	1384	964	1491	2594	2581	2838
CG4829	2.14177	2.08942	2.24398e-12	1.14268e-10	42	15	18	153	110	78
Sik3	-0.71795	6.78047	2.28281e-12	1.15817e-10	2661	2085	1940	1534	1429	1252
debcl	0.797485	5.46989	2.44087e-12	1.23381e-10	610	419	550	954	1050	843
CG17684	1.72357	2.08131	2.69794e-12	1.35875e-10	28	22	42	103	129	87
hdc	1.17209	6.72058	2.77838e-12	1.39416e-10	0	0	0	2	3	1
CG15117	-2.82925	0.225518	2.80022e-12	1.40001e-10	31	31	29	1	6	6
dtr	1.62731	1.76237	2.88059e-12	1.43497e-10	23	30	24	81	89	79
modSP	0.74467	6.83802	3.06353e-12	1.52059e-10	1747	1213	1237	2644	2609	2029
Ada	-1.3019	2.97849	4.57504e-12	2.26267e-10	192	190	157	93	66	69
Ten-a	0.928565	7.76076	4.68774e-12	2.3101e-10	3328	2093	1964	5773	4529	4135
CG34325	-1.19245	2.93345	5.66799e-12	2.78319e-10	208	158	148	95	72	66
Cyt-c-p	-0.778257	6.26275	6.21809e-12	3.04244e-10	1894	1499	1349	985	1091	799
CG9344	-0.797188	5.76794	6.52099e-12	3.17933e-10	1271	1141	952	703	765	555
CG9628	1.07151	6.67731	7.49103e-12	3.63937e-10	1162	814	1238	2976	2323	1771
grass	1.12912	3.00137	8.43945e-12	4.0857e-10	84	72	84	179	211	158
CG9902	0.814491	5.41532	9.15306e-12	4.41563e-10	567	480	456	995	838	906
CG42259	1.05171	3.61874	9.3067e-12	4.47405e-10	139	108	138	268	275	284
CG31414	1.64597	1.87586	9.49999e-12	4.55106e-10	29	29	25	111	75	85
Fuca	1.18129	2.86458	9.74108e-12	4.65035e-10	78	57	78	191	167	145
Clect27	-0.895721	5.41181	1.03465e-11	4.92228e-10	1008	838	848	417	562	520
CG15784	-0.798058	5.25843	1.24618e-11	5.90817e-10	900	649	821	464	483	463
kn	0.782976	5.03791	1.26774e-11	5.98975e-10	455	323	398	725	754	621
CG2064	0.968769	3.75083	1.36873e-11	6.44475e-10	148	145	144	296	310	286
CG10257	-4.14267	-0.465386	1.51462e-11	7.10733e-10	22	22	13	2	1	0
CG16985	-0.959613	4.25965	1.53236e-11	7.16613e-10	428	421	373	204	234	217
CG33307	3.29305	-0.0849221	1.54221e-11	7.18776e-10	1	4	2	26	29	20
CG32368	3.84343	-0.299497	1.64147e-11	7.62449e-10	0	1	3	20	27	18
GNBP2	-1.03862	4.27767	1.73357e-11	8.0252e-10	409	432	415	192	247	202
CG7565	-1.09621	3.59342	1.92072e-11	8.86174e-10	312	247	239	161	110	116
Spindly	-0.683602	6.48323	1.98667e-11	9.13534e-10	1958	1576	1832	1212	1188	1075
CG11875	-0.778494	5.21597	2.30931e-11	1.05836e-09	847	748	686	453	529	405
CG7367	-1.27488	3.137	2.3702e-11	1.08265e-09	235	194	173	107	97	56
CG10877	-0.881398	4.2759	2.49128e-11	1.13419e-09	489	382	352	214	254	219
eyg	0.752524	5.27484	2.50619e-11	1.13722e-09	563	392	453	849	920	693
CG8852	-1.26195	3.35857	2.81226e-11	1.2719e-09	214	228	252	89	122	93
CG10359	0.622119	7.39492	3.25293e-11	1.46638e-09	2408	1944	2106	3818	3654	2899
MED7	0.725995	5.90165	3.36523e-11	1.51204e-09	814	632	746	1197	1450	1126
pwn	0.604521	7.48755	4.30807e-11	1.92937e-09	2772	2093	2102	3655	3836	3462
Parp	-0.66094	7.50079	4.50329e-11	2.01025e-09	3945	3472	3370	2255	2469	2361
CG5642	-0.588469	8.81947	4.79784e-11	2.13481e-09	9964	7780	8734	6214	6445	5628
Cpr65Ax1	-6.78296	-0.934528	4.87386e-11	2.16163e-09	14	16	10	0	0	0
Nrt	1.06875	6.48208	4.89381e-11	2.1635e-09	1204	682	956	2697	1885	1581
ft	0.646892	8.97808	5.21282e-11	2.29715e-09	7892	5664	5733	11163	10122	9853
Toll-9	2.51965	0.241832	5.85519e-11	2.57198e-09	7	2	6	35	30	26
Msp-300	0.775805	9.53279	5.96044e-11	2.60988e-09	11130	8165	7524	18227	14197	14890
CG16947	0.866352	4.07116	6.16772e-11	2.69206e-09	214	161	201	357	408	327
CG1503	4.38842	-0.615238	6.38047e-11	2.77611e-09	0	0	2	18	14	19
rg	0.86496	6.95235	6.56014e-11	2.84528e-09	1827	1276	1210	3347	2495	2277
CG42598	1.31305	2.49551	6.60372e-11	2.85517e-09	62	48	44	165	121	112
beat-IIb	-2.22091	1.69212	6.65463e-11	2.86817e-09	125	59	71	31	17	8
NFAT	0.754136	6.53914	7.33859e-11	3.15307e-09	1377	975	1039	2261	1789	1851
Cpr65Ec	2.48616	2.22212	7.61599e-11	3.26206e-09	26	20	20	217	112	63
CG9812	1.26182	3.22991	7.91166e-11	3.37818e-09	109	69	88	271	238	156
l(2)41Ab	1.14988	2.4566	8.22209e-11	3.49986e-09	61	50	51	129	132	113
CG17083	-3.84976	-0.385556	8.3226e-11	3.53171e-09	20	26	14	1	2	1
Men-b	-0.693126	6.29408	8.43034e-11	3.56642e-09	1792	1506	1425	968	1095	969
CG1572	-0.846623	6.31984	8.63255e-11	3.64076e-09	1749	1589	1640	810	1139	937
CG5281	2.16885	0.579919	8.83621e-11	3.71526e-09	10	6	8	33	41	39
Gyc-89Db	3.93673	-0.551387	9.00684e-11	3.77546e-09	2	0	1	18	17	18
CG34120	1.07175	4.43581	9.15335e-11	3.82521e-09	326	194	166	536	497	444
chp	0.837373	4.06745	9.73098e-11	4.05428e-09	237	175	172	368	404	311
TfIIFbeta	0.688544	6.03111	9.83483e-11	4.08517e-09	948	698	798	1345	1543	1202
CG14257	1.52062	5.42633	1.02453e-10	4.24286e-09	532	216	356	1518	1047	691
CG3368	0.625355	6.74746	1.05799e-10	4.36824e-09	1618	1265	1244	2281	2298	2021
CG13676	0.741778	8.28656	1.08818e-10	4.47946e-09	5101	3208	3233	7398	6622	5813
scaf	-0.833855	6.28197	1.12928e-10	4.63475e-09	2196	1428	1295	931	993	903
Idh	0.645488	9.10071	1.15006e-10	4.70601e-09	8399	5955	6638	12859	11798	9426
Drip	0.835119	4.85855	1.34717e-10	5.49622e-09	429	308	281	691	636	551
CG13907	2.09468	0.82163	1.36126e-10	5.53725e-09	11	13	6	48	38	48
insc	-1.18707	3.62859	1.48573e-10	6.02574e-09	369	224	248	158	104	117
CG43867	0.896931	4.86753	1.65285e-10	6.68384e-09	433	309	256	695	647	575
CG34431	1.32123	2.21392	1.66792e-10	6.72499e-09	55	37	34	116	98	111
CG18641	-2.22032	0.703336	1.96129e-10	7.88471e-09	53	38	32	16	4	7
Gr61a	-1.33948	2.19275	2.13056e-10	8.54023e-09	106	99	107	36	44	48
CG13678	2.89716	0.361403	2.1911e-10	8.7574e-09	3	1	9	24	43	36
RhoGDI	-0.616171	8.71463	2.71862e-10	1.08343e-08	8877	7871	7954	5384	6098	5310
Prx3	-0.621995	6.74343	3.07412e-10	1.22156e-08	2382	1934	2014	1419	1601	1262
CG3253	-1.20104	2.75342	3.08729e-10	1.22326e-08	143	154	152	66	68	70
CG6401	0.870113	3.89489	3.11052e-10	1.22892e-08	200	159	150	367	331	270
Meltrin	1.21845	5.79853	3.12362e-10	1.23056e-08	737	434	478	1898	1170	904
mim	0.758757	6.11458	3.22286e-10	1.26603e-08	1033	667	824	1719	1447	1252
Uch	-0.578222	7.43546	3.9205e-10	1.5357e-08	3673	3138	3272	2523	2525	2008
CG1890	-0.65819	6.58868	4.2249e-10	1.65023e-08	2265	1825	1665	1364	1365	1065
salr	0.555674	8.13531	4.24204e-10	1.65223e-08	4376	3288	3473	5938	5931	5100
Cas	-0.562834	8.69868	4.3049e-10	1.67198e-08	8980	7307	7860	5758	5890	5334
Cyp18a1	-2.42051	1.73813	4.38867e-10	1.69971e-08	113	76	79	35	11	6
Arc2	-1.12909	2.66976	4.53178e-10	1.75021e-08	150	131	138	64	84	52
Chd64	-0.655157	8.59065	4.59981e-10	1.7714e-08	8558	7132	7282	4573	5480	5066
Gapdh1	-0.643139	7.92852	4.6253e-10	1.7714e-08	6042	4306	4239	3612	3384	2680
GstT3	0.90882	4.32968	4.6208e-10	1.7714e-08	249	178	250	409	509	403
mRpS14	-0.896614	3.50968	4.84255e-10	1.84945e-08	277	220	221	130	158	113
stan	0.728549	7.37618	5.09939e-10	1.94215e-08	2630	1813	1708	4136	3310	3065
CG42361	1.29606	2.493	5.17653e-10	1.96608e-08	71	49	36	125	131	138
Ada2a	0.685859	6.46053	5.36607e-10	2.03246e-08	1122	1056	1089	1777	2042	1679
yellow-c	-0.784006	5.26127	5.54924e-10	2.09606e-08	858	804	691	441	550	435
trx	0.632407	8.00922	5.63901e-10	2.12413e-08	3900	2972	3011	6085	4983	4802
CG43338	-3.02571	0.184549	5.75226e-10	2.16087e-08	36	16	38	5	0	6
CG9411	-1.20378	4.18078	6.20824e-10	2.32581e-08	616	320	316	208	171	173
CG15011	0.640071	5.59536	6.5205e-10	2.43615e-08	712	562	567	1096	1058	833
l(3)72Dr	4.95794	-0.806539	7.05596e-10	2.62906e-08	0	1	0	11	22	11
CG31475	0.753697	5.10166	7.12906e-10	2.64912e-08	525	352	374	710	744	716
CG33155	-0.757563	5.70579	7.20742e-10	2.67102e-08	1089	1068	1015	628	793	550
Pkc98E	0.677312	5.79368	7.25619e-10	2.68187e-08	904	564	630	1242	1182	1031
Rep	-0.591174	5.68119	7.5873e-10	2.79672e-08	1163	896	950	714	735	624
Tsp96F	0.632802	5.86395	7.71121e-10	2.8348e-08	827	734	657	1189	1248	1138
CG13954	-1.85428	1.30431	7.83163e-10	2.86548e-08	53	71	56	12	21	19
Osi14	-1.18876	3.92913	7.83635e-10	2.86548e-08	404	313	313	110	181	174
CG14174	-0.796927	4.46582	7.87009e-10	2.87018e-08	489	404	467	255	318	243
EndoG	-0.701119	5.5611	8.15835e-10	2.96744e-08	1063	915	865	586	721	518
CG31955	-1.357	1.78839	8.82916e-10	3.20296e-08	95	71	70	27	33	35
GstE3	-1.43815	1.6547	8.96569e-10	3.24393e-08	78	72	67	21	32	30
tobi	3.27095	-0.283559	8.99539e-10	3.24613e-08	2	3	1	28	24	12
B4	0.619606	6.7461	9.30094e-10	3.34761e-08	1526	1290	1301	2202	2213	2149
CG8027	-0.77844	4.13776	9.60115e-10	3.43985e-08	401	342	335	237	210	206
scb	-1.02289	6.1888	9.60726e-10	3.43985e-08	2054	1391	1364	1125	721	607
CG31030	-0.935026	3.07387	9.69897e-10	3.46367e-08	199	171	163	102	103	85
CG14301	-0.621964	5.68464	1.05096e-09	3.74344e-08	1114	923	995	702	772	582
CG10623	0.965319	3.49396	1.07356e-09	3.81406e-08	128	117	121	286	269	194
CG34398	0.754829	7.31807	1.17277e-09	4.15579e-08	2548	1688	1615	4010	3202	2954
Pvf1	-1.46582	2.54699	1.24713e-09	4.40791e-08	191	88	138	63	55	37
CG13053	2.29962	2.30859	1.28721e-09	4.53791e-08	36	20	23	217	132	60
rasp	0.581067	5.83773	1.33686e-09	4.7009e-08	834	683	712	1245	1218	1010
Nlg1	-1.36678	3.18669	1.38473e-09	4.85679e-08	214	200	217	125	69	63
mRpL53	-0.737978	5.92078	1.44294e-09	5.0481e-08	1275	1238	1153	732	924	651
CG10581	-1.14284	2.51595	1.44718e-09	5.05009e-08	164	109	107	60	57	60
CG7506	-0.686587	4.64145	1.4523e-09	5.0551e-08	545	474	474	332	339	295
CG5618	-0.98335	4.79492	1.50507e-09	5.22555e-08	615	576	592	270	416	261
CG8129	1.39312	3.26929	1.58379e-09	5.48501e-08	109	69	79	167	314	216
CG11253	0.843867	3.47674	1.65892e-09	5.73079e-08	138	117	128	242	248	225
Rbp1-like	0.631278	6.60103	1.79311e-09	6.17882e-08	1374	1175	1155	2200	2160	1638
rtet	-0.655061	5.88806	1.82469e-09	6.27191e-08	1421	1070	1052	891	795	650
Tie	0.88348	5.20185	1.83374e-09	6.28732e-08	445	407	400	667	853	873
CG12746	-0.676737	4.63213	1.8501e-09	6.32762e-08	576	453	456	332	329	302
CG10463	-0.666457	5.30969	1.85769e-09	6.33781e-08	898	712	760	586	542	428
gukh	0.578932	7.40752	1.89266e-09	6.44115e-08	2673	1870	2129	3845	3416	3053
vir-1	-0.614592	5.80258	1.92396e-09	6.53148e-08	1348	971	988	823	772	642
CG14102	1.08774	3.88867	2.13114e-09	7.21701e-08	189	133	138	266	421	323
CG42863	0.687289	5.56014	2.27703e-09	7.69211e-08	724	493	552	1098	916	924
hbs	0.951274	5.87182	2.38329e-09	8.03135e-08	881	513	575	1713	1209	1004
CG3630	-0.697973	5.5377	2.42612e-09	8.15567e-08	1151	752	915	585	695	517
Orco	6.6697	-0.992431	2.56983e-09	8.59673e-08	0	0	0	11	8	19
Spn47C	0.853049	4.23269	2.56385e-09	8.59673e-08	222	190	234	374	446	395
sda	-0.704542	8.06408	2.58855e-09	8.63833e-08	6819	5042	4428	3213	3517	3531
CG1988	-1.28555	2.76037	2.68302e-09	8.93193e-08	161	151	149	46	74	76
tam	0.711333	4.9571	3.14087e-09	1.04309e-07	483	322	347	697	686	567
CG10337	-0.907396	4.15448	3.19057e-09	1.05704e-07	393	378	351	180	252	193
RhoL	-0.781537	4.28108	3.20707e-09	1.05995e-07	463	376	356	229	286	208
Jra	-0.603313	6.07085	3.29659e-09	1.08693e-07	1494	1215	1241	942	979	786
esn	0.699588	6.78026	3.7728e-09	1.24096e-07	1723	1019	1380	2509	2403	1992
stwl	0.657409	5.43975	3.92584e-09	1.28822e-07	659	513	471	961	877	843
Nmdmc	-0.655894	5.79778	4.39348e-09	1.43824e-07	1352	1047	930	737	836	620
Cap-D3	0.619473	5.46349	4.46923e-09	1.45956e-07	615	505	569	905	936	856
heph	0.614147	9.42921	4.52538e-09	1.47439e-07	11351	7841	7617	14982	13876	13340
mtacp1	-0.581098	7.02781	4.53625e-09	1.47444e-07	2867	2398	2355	1789	1973	1546
CG1299	-0.702632	4.70372	4.6827e-09	1.51488e-07	625	500	448	333	353	315
Cg25C	0.79951	6.3471	4.68268e-09	1.51488e-07	1334	868	730	1843	1743	1640
CG10559	-1.12299	2.36934	4.92536e-09	1.58255e-07	119	116	103	52	65	45
CG42540	3.57396	-0.528452	4.91893e-09	1.58255e-07	2	0	2	12	17	24
GstD1	-0.54401	9.54796	4.92641e-09	1.58255e-07	16784	12418	14229	11140	10929	8884
CG9447	2.27757	0.553708	5.05653e-09	1.62056e-07	5	5	12	40	28	44
NLaz	-3.44986	-0.430563	5.11865e-09	1.63666e-07	31	14	12	3	2	0
CG30047	1.41867	1.79457	5.52673e-09	1.76304e-07	28	32	28	71	84	90
Mpcp	-0.512845	8.85251	5.59062e-09	1.77929e-07	10136	7989	8412	6609	6923	5793
Ir51b	0.882018	3.37714	5.83054e-09	1.85136e-07	119	115	116	237	248	190
Mnn1	0.606181	7.16247	6.29174e-09	1.99321e-07	2233	1573	1759	3314	2846	2605
CG13278	-1.23027	1.85167	6.53482e-09	2.06546e-07	89	74	77	31	39	36
EndoGI	-0.565917	6.947	6.66453e-09	2.10162e-07	2783	2207	2200	1679	1763	1591
Snoo	0.682743	5.35227	6.68304e-09	2.10263e-07	636	448	450	960	810	773
CG32111	0.58235	6.24047	6.75405e-09	2.12012e-07	1098	881	968	1543	1628	1415
rdo	0.76521	6.5181	7.26893e-09	2.27655e-07	1390	876	1070	2393	1962	1521
mas	0.582934	7.36169	7.4116e-09	2.31596e-07	2661	1960	1836	3711	3319	2971
Sb	1.02599	5.76905	7.59988e-09	2.3694e-07	796	409	569	1636	1229	866
CG7044	0.619016	5.76457	7.96922e-09	2.47893e-07	717	632	727	1168	1218	952
Lcp65Ag2	-1.79573	1.19375	8.48036e-09	2.63198e-07	67	57	42	8	19	22
CG13531	0.560261	5.80672	9.20846e-09	2.84075e-07	839	687	676	1213	1131	1029
CG14321	6.64714	-0.995156	9.18466e-09	2.84075e-07	0	0	0	6	21	11
Cyp9b1	4.7194	-0.994092	9.21505e-09	2.84075e-07	0	0	1	10	14	13
mGluRA	-2.35685	0.0494117	1.02396e-08	3.14954e-07	34	20	22	4	5	6
sima	0.596121	7.60157	1.03017e-08	3.16158e-07	3219	2203	2183	4275	3846	3707
CG5525	-0.519461	9.13239	1.0447e-08	3.19901e-07	12425	9618	10259	7915	8648	6862
Sema-2b	0.637696	7.81354	1.08101e-08	3.30285e-07	3599	2564	2481	5457	4388	4052
CG16800	-3.74659	-0.775635	1.12958e-08	3.4436e-07	12	17	14	2	0	1
pk	0.728581	5.80639	1.16736e-08	3.5509e-07	828	515	720	1384	1204	957
CG11486	0.609032	6.97298	1.18576e-08	3.59891e-07	1920	1411	1535	2972	2492	2234
Cyp6d2	-1.18851	2.25617	1.21896e-08	3.69153e-07	105	103	108	62	44	39
Skeletor	0.602646	6.59256	1.24679e-08	3.76751e-07	1461	1164	1115	2196	1877	1814
FK506-bp1	-0.528829	9.22865	1.30961e-08	3.94864e-07	12962	10626	10958	8072	9192	7635
CG13618	-3.32886	-0.529714	1.31555e-08	3.95787e-07	25	15	12	5	0	0
danr	3.39374	-0.413488	1.36135e-08	4.08673e-07	5	0	0	28	19	11
Cyp12a5	1.96832	0.438497	1.53962e-08	4.61181e-07	6	8	10	37	32	30
dp	0.657498	8.81922	1.55374e-08	4.64398e-07	5674	4336	4561	5058	5027	4537
CG16824	1.90353	0.591846	1.60762e-08	4.7946e-07	7	9	12	32	39	39
Dl	0.859759	6.59575	1.62902e-08	4.84791e-07	1543	1007	843	2550	1876	1888
CG14441	0.887428	3.85343	1.6845e-08	5.00221e-07	205	136	152	325	282	330
CG3008	-0.549565	6.45275	1.70061e-08	5.03916e-07	1943	1518	1617	1253	1281	1071
CG6931	-0.711627	3.98624	1.78071e-08	5.26514e-07	362	283	310	199	227	180
CG5758	1.07953	7.31159	1.86014e-08	5.48822e-07	2260	1186	1607	5129	3453	2458
seq	0.831797	4.65515	1.98933e-08	5.85681e-07	386	258	243	655	506	468
Gld	0.942404	4.46923	2.03769e-08	5.98637e-07	268	199	267	627	479	370
RpLP2	-0.58411	10.2209	2.06371e-08	6.04988e-07	25331	23305	20920	15389	17817	15166
CG34355	1.02747	4.24578	2.09169e-08	6.11885e-07	242	157	208	569	383	334
rpr	-0.825531	4.86718	2.12053e-08	6.19007e-07	636	593	577	312	358	387
CG34125	-0.54637	5.92034	2.22563e-08	6.48309e-07	1322	1049	1132	882	878	735
LpR2	0.671442	7.70113	2.28152e-08	6.63184e-07	3487	2315	2115	4949	4305	3728
Cyp1	-0.500032	10.6062	2.3429e-08	6.7959e-07	34343	26847	28030	22889	23460	19228
PGRP-LF	-1.24622	1.79758	2.35321e-08	6.81142e-07	88	63	81	29	35	37
CG31211	0.531929	7.79148	2.36379e-08	6.82769e-07	3219	2543	3059	4588	4597	4081
CG43986	1.13504	2.34475	2.38867e-08	6.87893e-07	71	41	40	129	107	108
Ir40a	4.67422	-1.02399	2.39154e-08	6.87893e-07	0	1	0	9	17	10
CG18853	0.628653	6.32046	2.55117e-08	7.32277e-07	1057	969	1014	1539	1842	1528
CG3339	6.47431	-1.11693	2.59352e-08	7.4288e-07	0	0	0	14	16	4
CG2225	0.544959	6.58884	2.64854e-08	7.57065e-07	1438	1151	1225	1984	1944	1843
CG3036	-0.997934	4.54382	2.69156e-08	7.67765e-07	670	403	455	352	232	205
Adgf-A	1.53231	1.23857	2.70775e-08	7.70783e-07	28	12	16	51	70	47
CG7787	-0.776145	4.86639	2.80444e-08	7.96659e-07	595	515	671	389	375	324
l(2)37Cc	-0.497751	7.89937	3.00402e-08	8.51592e-07	5180	4100	4360	3383	3691	2973
CG16791	0.565586	7.37055	3.10551e-08	8.78553e-07	2749	1798	2015	3757	3343	2922
arr	0.570557	8.48868	3.232e-08	9.11461e-07	6027	4041	4160	7926	7173	6652
CG3168	-0.880451	5.40763	3.23509e-08	9.11461e-07	1133	842	721	656	507	361
CG42748	0.629253	8.33359	3.26874e-08	9.17182e-07	5337	3692	3440	7481	6287	6079
viaf	-0.595816	6.28624	3.2673e-08	9.17182e-07	1897	1281	1432	1121	1146	890
CG6752	-0.698774	4.86511	3.29103e-08	9.21555e-07	624	567	556	356	395	369
CG3328	0.61795	7.03351	3.43074e-08	9.58725e-07	2183	1431	1474	2991	2665	2386
kst	0.570611	9.10018	3.4547e-08	9.63462e-07	8631	6199	6814	12743	10397	10099
CG1698	0.740345	3.93529	3.50166e-08	9.74581e-07	203	170	180	361	336	267
tai	0.593965	6.71123	3.70055e-08	1.02785e-06	1704	1162	1233	2280	2043	2044
CG41284	1.10109	2.44638	3.71372e-08	1.02944e-06	67	50	48	153	113	102
uif	0.610874	9.34794	3.7352e-08	1.03331e-06	10744	7276	7363	14811	12367	12655
Treh	-0.586068	6.58873	3.85013e-08	1.06296e-06	2141	1828	1659	1457	1354	1099
CG33255	0.678919	4.35923	3.88073e-08	1.06926e-06	274	255	233	451	435	386
Cyp4e3	-4.0239	-0.964546	4.19556e-08	1.15369e-06	16	12	9	1	1	0
CG16700	0.892704	5.01508	4.23359e-08	1.16183e-06	400	306	393	604	684	812
LanB1	0.50692	9.21528	4.26368e-08	1.16776e-06	9433	7258	7325	12665	11718	10953
CG18507	-0.738811	5.34925	4.31542e-08	1.17958e-06	943	768	771	428	559	549
CG14372	0.959353	4.39136	4.36979e-08	1.19207e-06	313	192	193	591	467	346
CG12171	-0.638788	5.08826	4.51993e-08	1.23059e-06	802	633	586	466	494	388
Traf-like	-0.648711	5.5133	4.56473e-08	1.24033e-06	932	899	867	575	698	530
CG3649	-0.761559	5.13806	4.59597e-08	1.24635e-06	923	596	656	543	434	350
CG2950	0.546431	5.96468	4.71812e-08	1.27696e-06	986	708	787	1292	1276	1178
sni	-0.770506	4.44375	4.73918e-08	1.28014e-06	496	457	377	261	320	233
hang	0.600777	7.93003	4.84933e-08	1.30732e-06	3934	2903	2672	5479	4616	4761
wts	0.589533	6.3889	4.90375e-08	1.31941e-06	1329	936	1012	1891	1626	1575
Nep3	2.50909	-0.264664	5.04135e-08	1.35378e-06	4	3	3	26	19	16
CG12868	-0.945625	3.3421	5.28576e-08	1.41665e-06	229	189	226	103	113	130
CG9350	-0.531291	6.02128	5.50218e-08	1.47178e-06	1479	1130	1142	919	954	817
dpr6	4.59371	-1.08518	5.55219e-08	1.48227e-06	1	0	0	14	13	7
CG14397	-2.66009	-0.351845	5.56595e-08	1.48307e-06	25	14	18	2	4	3
mle	0.541847	7.09717	5.75911e-08	1.53157e-06	2047	1564	1827	2977	2751	2494
dac	0.6563	4.472	6.05813e-08	1.60798e-06	322	231	284	499	462	408
CG3568	0.922096	4.08816	6.24011e-08	1.65205e-06	260	126	190	376	420	325
CG9836	-0.533787	5.99777	6.24821e-08	1.65205e-06	1379	1133	1168	876	966	802
Lcp65Af	-6.31472	-1.27932	6.28163e-08	1.6577e-06	13	11	5	0	0	0
Myo61F	-0.564445	6.45674	6.3291e-08	1.66703e-06	1989	1503	1628	1364	1211	1023
Dll	0.555055	5.70272	6.61222e-08	1.73827e-06	828	567	668	1139	1082	918
CG31462	2.01894	0.414913	7.11055e-08	1.86571e-06	10	9	4	45	26	27
CG10200	-0.643727	6.89756	7.15816e-08	1.87462e-06	2608	2002	2475	1855	1652	1235
obst-A	0.503852	7.35418	7.43455e-08	1.9433e-06	2568	1890	2157	3336	3212	3146
tud	0.572254	8.48896	7.83293e-08	2.04355e-06	5721	4310	4125	8104	6721	6900
exba	-0.508148	10.5677	7.96029e-08	2.07284e-06	33358	27370	26255	23142	22379	18183
CG1139	2.19165	0.287582	7.98416e-08	2.07513e-06	12	4	3	42	28	21
BthD	-0.647439	5.70239	8.03655e-08	2.08147e-06	1081	1022	975	606	766	676
CG3530	0.592737	5.43604	8.03885e-08	2.08147e-06	693	450	547	924	919	790
CG4199	-0.484133	7.77569	8.09197e-08	2.08736e-06	4965	3740	3803	3245	3245	2776
CG9503	1.24646	4.11523	8.08887e-08	2.08736e-06	215	126	160	600	359	276
upd3	-1.49112	1.08079	8.13139e-08	2.0936e-06	57	42	46	17	13	23
CG42588	-0.553806	5.60237	8.54271e-08	2.1954e-06	1086	892	838	724	663	605
Cad74A	0.517966	8.15813	8.74347e-08	2.2428e-06	4511	3535	3437	6317	5539	5187
CG34380	0.700326	6.395	8.90302e-08	2.27947e-06	1313	827	1010	2153	1745	1402
Obp73a	-1.44305	1.17951	9.16749e-08	2.34282e-06	53	44	57	22	25	12
Tl	0.577303	6.23972	9.58697e-08	2.44548e-06	1172	858	934	1723	1460	1395
Smr	0.590001	7.10347	9.83702e-08	2.50462e-06	2245	1523	1624	3076	2628	2649
TwdlT	3.05963	2.04013	1.00465e-07	2.55322e-06	19	9	13	241	91	31
GstE5	-1.45426	2.62898	1.02022e-07	2.58802e-06	174	158	104	83	44	39
BoYb	2.18365	0.217012	1.03246e-07	2.61424e-06	9	4	5	20	41	25
br	1.14664	7.23866	1.16933e-07	2.95536e-06	2368	1264	1060	4921	2998	2683
CG43117	1.92561	0.292467	1.18809e-07	2.99725e-06	7	9	6	29	31	28
Atet	0.959805	3.84141	1.19557e-07	3.01061e-06	207	125	142	386	346	225
5-HT1A	4.50828	-1.14668	1.2504e-07	3.14291e-06	0	0	1	10	13	9
CG7183	-0.633584	4.42757	1.25686e-07	3.15338e-06	472	367	432	285	313	254
E(spl)m2-BFM	0.593716	5.70527	1.27414e-07	3.19093e-06	719	610	688	1123	1214	852
Surf6	-0.578197	6.09773	1.31971e-07	3.29902e-06	1425	1304	1250	913	1044	828
CG10365	-1.20279	2.29093	1.40654e-07	3.50971e-06	92	115	116	49	58	41
CG17337	-0.519097	7.27705	1.50806e-07	3.75622e-06	3207	2836	2833	2320	2241	1907
tsr	-0.519545	10.3479	1.5119e-07	3.75896e-06	26528	23906	24110	19828	19402	15262
ewg	0.507768	7.09508	1.55257e-07	3.85311e-06	2109	1684	1714	2714	2833	2571
CG10098	-0.59631	6.03372	1.56424e-07	3.87508e-06	1525	1107	1225	1038	874	737
phm	-1.3932	1.15231	1.61203e-07	3.98629e-06	2266	1860	2021	2402	2678	1980
CG11309	-0.594014	4.58278	1.62917e-07	4.02146e-06	536	427	439	344	344	278
pip	1.44533	2.92655	1.65392e-07	4.07523e-06	88	43	66	273	158	125
Cyp4p3	6.46738	-1.11711	1.76185e-07	4.3334e-06	0	0	0	19	12	3
CoVb	-0.53291	6.85297	1.9092e-07	4.67906e-06	2575	2083	2013	1626	1820	1356
Cyp6a2	3.48751	-0.883779	1.9071e-07	4.67906e-06	0	0	3	17	12	10
tun	0.524318	6.23992	1.9156e-07	4.6864e-06	1176	906	943	1569	1518	1419
csul	-0.521406	6.38789	1.93283e-07	4.72015e-06	1790	1428	1590	1158	1254	1070
wech	0.877397	4.46682	1.95273e-07	4.7603e-06	344	224	196	558	414	466
fs(1)h	0.589628	7.9078	1.95621e-07	4.76035e-06	4044	2728	2668	5452	4539	4603
CG10026	-1.88306	0.183679	2.07817e-07	5.04818e-06	31	24	24	8	10	4
Cct5	-0.489787	9.28719	2.16464e-07	5.22133e-06	14323	10802	10624	9465	9349	7596
Men	-0.863395	4.32425	2.1587e-07	5.22133e-06	562	360	347	300	234	186
rst	0.542382	6.18992	2.15351e-07	5.22133e-06	1158	848	900	1602	1554	1238
Ten-m	0.700582	7.63412	2.16445e-07	5.22133e-06	3324	2186	1960	4943	3732	3781
CG9733	-1.78982	0.438072	2.25077e-07	5.41959e-06	45	23	27	10	9	9
Spn55B	-0.662747	4.91748	2.2644e-07	5.44287e-06	738	531	542	464	385	336
CG42372	-0.707619	4.81508	2.2709e-07	5.44898e-06	591	558	540	328	423	330
CG30100	-0.707619	4.81508	2.2777e-07	5.45576e-06	591	558	540	328	423	330
Cpr51A	0.749069	4.45718	2.31119e-07	5.52636e-06	310	281	203	484	478	425
alpha-Man-I	-0.519877	6.66553	2.37341e-07	5.65578e-06	2133	1852	1830	1557	1418	1254
RhoBTB	0.487022	7.20462	2.37355e-07	5.65578e-06	2264	1817	1907	2975	3026	2712
CG11151	-0.536445	6.06323	2.37971e-07	5.66067e-06	1448	1132	1277	946	933	879
CG10657	0.650512	4.4574	2.48062e-07	5.88035e-06	325	262	243	513	457	385
dnr1	0.721992	4.28522	2.47702e-07	5.88035e-06	295	197	225	366	442	410
CG42322	1.8433	0.230298	2.64508e-07	6.25941e-06	9	6	7	32	28	23
gig	0.51166	6.47013	2.66637e-07	6.29895e-06	1391	1099	1077	1874	1794	1607
RpLP0-like	-0.530071	6.91057	2.73982e-07	6.46137e-06	2475	2232	2194	1688	1867	1444
La	-0.473703	8.39487	2.80415e-07	6.60175e-06	7677	5656	5841	4930	5204	4178
CG31068	1.14833	2.37685	2.81074e-07	6.60596e-06	66	51	37	134	97	121
CG7272	-0.636355	4.10324	2.85367e-07	6.6954e-06	395	317	304	229	239	210
Ddr	1.05909	3.40932	2.88632e-07	6.76048e-06	162	99	75	283	223	212
grh	0.617225	7.94886	2.90754e-07	6.79861e-06	4186	2615	2821	5956	4703	4508
Ssb-c31a	-0.631339	6.33587	2.95915e-07	6.90752e-06	1627	1702	1414	1052	1168	989
mbl	0.534331	6.48922	3.00838e-07	7.01054e-06	1434	1085	1069	1971	1751	1655
CG44102	-1.87488	0.291901	3.05679e-07	7.11129e-06	39	23	24	8	12	4
elm	-0.560411	5.26676	3.10521e-07	7.21173e-06	848	720	664	537	570	468
inaE	0.619995	5.02083	3.13332e-07	7.25678e-06	528	366	358	655	706	623
nop5	-0.472833	8.62071	3.13516e-07	7.25678e-06	9059	6640	6732	5893	5906	4936
CG34247	3.56935	0.136917	3.15936e-07	7.30051e-06	4	1	2	61	18	12
Haspin	0.618686	6.2369	3.28312e-07	7.57377e-06	953	920	1000	1513	1543	1547
TwdlB	6.05245	-1.42897	3.29502e-07	7.58848e-06	0	0	0	8	10	7
Ac13E	0.8498	3.5167	3.39766e-07	7.81177e-06	175	106	116	293	231	214
eIF-5A	-0.502528	11.2022	3.44936e-07	7.91739e-06	46856	44019	43032	33351	35070	30400
CG30392	0.611232	4.58733	3.47563e-07	7.96441e-06	329	284	307	477	544	444
CG3902	0.564457	6.89882	3.50142e-07	8.01016e-06	1963	1412	1348	2725	2493	2017
wun	-0.50163	5.66462	3.54059e-07	8.0863e-06	1122	856	923	744	777	609
Dbp80	-0.500347	7.99568	3.68012e-07	8.39104e-06	5147	4496	4878	3495	3700	3488
Fs	0.517707	5.54146	3.77633e-07	8.59616e-06	698	558	607	1001	970	806
shn	0.510626	7.14969	3.86938e-07	8.79339e-06	2268	1766	1691	3034	2775	2633
CG6726	-0.515687	5.50104	3.92539e-07	8.90597e-06	1007	787	805	639	689	560
CG9114	-0.648495	5.28711	3.97254e-07	8.9981e-06	811	699	801	453	564	516
CG32196	-3.25717	-0.610369	4.01689e-07	9.08359e-06	12	24	12	1	4	0
unc	1.00643	2.51015	4.0243e-07	9.0854e-06	54	53	72	122	134	120
CG17470	-1.12167	1.696	4.06526e-07	9.16283e-06	81	61	68	28	42	30
CycT	0.603597	6.42462	4.13294e-07	9.30012e-06	1444	993	915	1967	1739	1545
beat-IIa	-4.45856	-1.2451	4.20932e-07	9.45652e-06	13	7	9	1	0	0
nej	0.783215	6.50613	4.21958e-07	9.46412e-06	1454	978	859	2401	1610	1800
CG8258	-0.481713	9.20133	4.28701e-07	9.59969e-06	13739	9839	10090	8848	8949	7171
mthl3	0.478685	8.3843	4.30711e-07	9.62902e-06	5125	4308	4171	6422	6931	6321
CG7432	-0.839156	3.74582	4.38047e-07	9.77051e-06	340	284	212	154	180	150
mira	1.53866	0.865143	4.38461e-07	9.77051e-06	17	13	12	48	51	29
cic	0.503178	8.30445	4.42108e-07	9.83583e-06	5219	3762	3847	6775	5995	5976
mwh	1.14096	2.1136	4.4494e-07	9.88285e-06	42	39	46	78	117	97
LanA	0.482596	9.71414	4.46983e-07	9.91221e-06	13485	10190	10614	17762	15960	15799
CG15312	1.82434	0.32861	4.55704e-07	1.00893e-05	8	7	9	31	25	33
CG11893	-2.3078	-0.261119	4.62739e-07	1.02286e-05	25	16	18	4	2	6
CG13739	-1.68714	0.789341	4.64735e-07	1.02563e-05	31	45	44	10	16	13
CG10924	0.937797	2.72447	4.67434e-07	1.02993e-05	69	77	69	133	164	134
wit	0.518929	6.55013	4.77945e-07	1.0514e-05	1550	1052	1176	2011	1875	1702
CG14964	1.52239	1.09193	4.84169e-07	1.06339e-05	15	19	16	38	56	56
CG10320	-0.579255	5.52795	5.12837e-07	1.12456e-05	1115	834	757	654	699	525
gpp	0.577867	7.15152	5.27847e-07	1.15514e-05	2322	1513	1770	3383	2799	2463
Tsp74F	0.602439	5.15893	5.28465e-07	1.15514e-05	488	401	486	744	714	711
sm	2.63194	1.83033	5.93887e-07	1.29609e-05	21	10	15	202	55	43
Proc-R	3.1804	-0.195687	5.95705e-07	1.29799e-05	4	2	1	8	34	26
Pglym78	-0.504685	6.38847	6.01911e-07	1.30944e-05	1906	1379	1524	1231	1273	1012
cora	0.500919	9.28292	6.13538e-07	1.33263e-05	10200	7206	7896	13214	11732	11947
Sema-2a	0.453559	9.79496	6.50015e-07	1.40963e-05	14145	10985	11509	18837	17329	15875
CG18213	-0.636708	5.46016	6.82831e-07	1.47846e-05	917	818	862	503	629	603
E(spl)m7-HLH	0.57126	5.40736	7.12249e-07	1.53974e-05	589	480	587	888	956	727
Mnt	0.58183	5.9667	7.28707e-07	1.57284e-05	979	730	739	1504	1163	1128
Sod2	-0.515761	6.83228	7.39869e-07	1.59443e-05	2464	2081	1987	1660	1797	1314
CG34057	2.18731	0.150948	7.41065e-07	1.59451e-05	9	3	5	39	29	14
CG7033	-0.446841	9.06897	7.535e-07	1.61873e-05	12135	8946	9275	7892	8201	6960
lbk	0.481283	7.44238	8.01126e-07	1.71836e-05	2869	2006	2242	3871	3458	2961
S2P	0.478193	5.69459	8.03608e-07	1.721e-05	792	657	656	1058	1081	912
RpII140	-0.444075	8.41233	8.13548e-07	1.73958e-05	7044	5978	6092	5012	5147	4471
CG43154	0.631771	5.81593	8.19849e-07	1.75033e-05	910	603	655	1393	1014	1054
tty	1.24484	1.3152	8.48576e-07	1.80885e-05	24	20	24	65	51	52
Sod3	0.457965	7.46994	8.53593e-07	1.81673e-05	2841	2061	2403	3768	3658	2994
Drep-2	-1.41753	0.863574	8.67981e-07	1.84449e-05	51	35	36	13	18	16
CG5177	-1.2463	2.15724	8.74995e-07	1.85653e-05	118	100	82	28	48	54
CG6700	0.45393	7.77724	8.96892e-07	1.89747e-05	3353	2683	2985	4696	4419	3756
mgl	0.848687	6.7957	8.97052e-07	1.89747e-05	1869	1151	913	3009	2123	2109
CG6788	-3.83534	-1.11024	9.28623e-07	1.96123e-05	8	15	9	0	1	1
lola	0.531389	7.91124	9.51938e-07	2.00125e-05	4094	2788	2802	5369	4525	4504
Spn	0.854643	4.64433	9.51058e-07	2.00125e-05	396	253	225	691	483	453
yellow-d2	1.12583	1.9455	9.49282e-07	2.00125e-05	34	38	41	106	83	70
CG33229	0.484665	7.49167	9.78957e-07	2.05491e-05	2730	2443	2124	3638	3656	3328
yellow-d	0.800249	3.30561	9.94176e-07	2.08368e-05	121	97	128	237	224	169
N	0.602833	9.02921	9.97e-07	2.08642e-05	8946	6051	5462	12270	10021	9644
CG8066	-1.29255	1.176	1.00587e-06	2.10178e-05	52	51	46	21	18	24
CG10802	-0.574937	4.83187	1.02255e-06	2.13338e-05	632	483	544	385	418	353
CG14763	0.969636	2.46534	1.03719e-06	2.16066e-05	65	62	50	127	144	92
FANCI	0.569614	6.3065	1.06918e-06	2.22393e-05	1162	980	958	1441	1688	1634
Sin3A	0.496463	9.09907	1.08262e-06	2.24849e-05	9212	6513	6617	12222	10521	9797
serp	0.519109	7.75742	1.16759e-06	2.4213e-05	3706	2422	2626	4887	4474	3601
Adam	-0.453687	7.31058	1.19175e-06	2.46768e-05	3357	2812	2770	2408	2417	1977
Sans	0.847798	6.45137	1.22962e-06	2.54226e-05	1108	823	1111	2607	1868	1280
dikar	0.761266	6.4212	1.25411e-06	2.58899e-05	1441	922	779	2214	1593	1647
alpha-Man-IIb	0.517618	5.31225	1.26975e-06	2.61736e-05	581	488	517	858	801	706
mbf1	-0.420608	7.37927	1.31066e-06	2.69765e-05	3521	2818	2956	2487	2553	2178
CG33491	-1.16248	3.17368	1.31594e-06	2.70446e-05	294	164	153	123	98	60
mtg	-0.567927	5.42731	1.32615e-06	2.72139e-05	1040	705	774	680	573	504
cv-2	-0.519668	6.243	1.34864e-06	2.7634e-05	1766	1176	1433	1100	1077	973
CG32280	-0.488819	5.77668	1.37027e-06	2.80356e-05	1115	936	1058	760	836	712
CG1792	0.556262	4.33559	1.38993e-06	2.83954e-05	298	239	255	421	418	371
san	-0.50852	6.44985	1.40507e-06	2.86622e-05	1881	1548	1572	1248	1404	1017
mad2	-0.559023	6.35593	1.40951e-06	2.87101e-05	1596	1533	1590	1058	1256	1039
dsx-c73A	1.21685	1.57687	1.42045e-06	2.88901e-05	36	14	34	67	73	62
CG42673	-0.51506	6.26015	1.44123e-06	2.92695e-05	1759	1219	1438	1169	1053	973
Cyp6d4	0.786815	3.34223	1.45041e-06	2.94125e-05	138	88	133	237	220	186
CG8908	1.56301	1.38636	1.48199e-06	3.00087e-05	34	18	10	46	73	68
Su(z)2	0.506724	5.35572	1.50406e-06	3.04107e-05	644	483	522	886	832	714
CG30497	0.858197	3.7771	1.55913e-06	3.14779e-05	219	143	114	294	289	300
tio	0.499467	6.2135	1.56532e-06	3.15565e-05	1151	898	949	1631	1436	1332
CG9987	-0.501564	6.28927	1.60368e-06	3.22826e-05	1790	1307	1389	1177	1196	917
CG6115	-0.466272	6.88127	1.608e-06	3.23222e-05	2529	1996	2146	1821	1765	1441
f	0.914274	2.27686	1.6171e-06	3.24577e-05	67	39	54	106	108	98
CG33468	-3.32946	-0.777967	1.65614e-06	3.31444e-05	14	6	22	1	2	1
CG6045	-0.599187	5.58632	1.65583e-06	3.31444e-05	987	906	911	582	652	687
pdgy	0.570536	6.86786	1.68749e-06	3.37228e-05	1916	1299	1400	2815	2410	1881
Arf102F	-0.453932	7.52755	1.69162e-06	3.37562e-05	3679	3276	3399	2630	2905	2363
CG11985	-0.529564	5.64979	1.70335e-06	3.39412e-05	966	932	969	712	756	614
LSm1	-0.551923	5.30673	1.70953e-06	3.39657e-05	798	772	707	563	562	498
mRpL44	-0.520573	5.8243	1.70915e-06	3.39657e-05	1261	1062	931	777	900	684
Dys	0.507074	8.14021	1.7236e-06	3.41958e-05	4745	3233	3473	6227	5219	5304
CG15864	0.732996	4.25349	1.72904e-06	3.42543e-05	225	215	249	369	410	414
CG7720	1.14284	4.71924	1.75756e-06	3.47694e-05	345	217	241	938	543	368
CG10344	-1.16469	2.44398	1.77281e-06	3.50205e-05	143	103	116	40	51	74
l(3)72Dp	0.68402	3.28286	1.78756e-06	3.52613e-05	142	103	115	214	205	181
CG6220	2.30687	2.94594	1.81308e-06	3.56623e-05	13	38	67	210	315	120
png	-1.69306	0.320105	1.81269e-06	3.56623e-05	31	25	29	10	6	11
Fas3	0.496178	8.97886	1.86809e-06	3.66919e-05	8827	5887	5908	10708	10006	9199
Traf4	-0.64676	4.5182	1.87286e-06	3.67331e-05	541	386	437	367	286	251
CG7668	-0.463263	6.9972	1.87972e-06	3.68153e-05	2618	2209	2374	1846	1914	1679
eEF1delta	-0.453821	9.11069	1.88476e-06	3.68614e-05	11466	9851	9784	8553	8543	6640
CG41128	-0.68953	5.80551	1.93003e-06	3.76932e-05	1005	1175	1134	644	816	703
CG10205	-2.57296	-0.551332	1.95955e-06	3.82154e-05	23	9	16	5	2	1
CG8451	-0.810137	3.67525	1.96569e-06	3.82809e-05	252	247	283	137	183	147
AnnX	-0.690172	4.31486	1.97601e-06	3.83764e-05	497	333	371	311	263	198
futsch	1.17426	2.8857	1.97618e-06	3.83764e-05	94	81	43	203	141	164
CG10962	1.84357	0.838758	2.03983e-06	3.95566e-05	16	8	11	69	39	24
CG2014	2.17245	-0.115084	2.09015e-06	4.04753e-05	8	2	4	27	14	25
CG11555	-0.49227	5.41529	2.09828e-06	4.05756e-05	915	761	751	606	651	538
CG17267	-0.695646	3.35575	2.13191e-06	4.11681e-05	237	167	209	131	138	123
CG12038	1.98747	1.25283	2.17729e-06	4.19853e-05	19	4	21	85	66	32
CG33469	-3.07536	-0.963213	2.23508e-06	4.30394e-05	12	14	9	3	1	0
CG3226	-0.562598	7.08872	2.25291e-06	4.3322e-05	2777	2569	2525	1712	2252	1619
CG6443	-0.575208	4.73578	2.25833e-06	4.33657e-05	564	455	529	375	404	305
CG15544	0.954547	4.75299	2.26721e-06	4.34754e-05	362	238	295	856	543	410
CG3921	0.461303	8.1228	2.32628e-06	4.45459e-05	4534	3569	3365	5936	5315	5094
spn-E	0.682471	3.53288	2.34966e-06	4.49312e-05	148	127	152	258	246	211
Cyp4ae1	0.955224	2.87538	2.37235e-06	4.53021e-05	111	77	53	178	153	150
CG32549	0.780532	4.16244	2.44271e-06	4.65809e-05	232	157	249	440	360	339
CG32241	2.07227	-0.00765545	2.46489e-06	4.69387e-05	4	3	9	17	27	27
Eip75B	0.659003	5.90688	2.49595e-06	4.74646e-05	951	653	677	1597	1130	1004
CG10399	-0.659239	3.68982	2.51301e-06	4.77229e-05	281	241	242	160	196	148
CG9727	0.625772	5.67799	2.52755e-06	4.79328e-05	862	588	528	1195	939	1000
CG3800	-0.433972	11.4665	2.55946e-06	4.84711e-05	60870	49151	48754	44070	42980	35285
CG13693	1.33901	2.17815	2.60028e-06	4.91765e-05	62	36	25	127	78	112
Alk	0.750759	3.09384	2.60461e-06	4.91907e-05	128	86	93	184	171	178
Su(Tpl)	0.619419	6.51162	2.68072e-06	5.05586e-05	1537	982	1024	2250	1678	1669
RpS5b	-1.92636	0.103706	2.78335e-06	5.24222e-05	36	23	16	4	8	8
ltd	-1.1537	2.15996	2.87603e-06	5.40938e-05	123	99	73	63	46	29
NT1	1.21197	3.26663	2.90598e-06	5.45823e-05	107	89	82	338	197	142
Ucrh	-0.56067	7.36019	2.92762e-06	5.49138e-05	3080	3126	3244	2039	2427	2237
sbb	0.638821	7.71388	2.96748e-06	5.55857e-05	3599	2110	2409	5370	3929	3685
Prosalpha5	-0.435504	7.72597	3.02171e-06	5.65244e-05	4618	3688	3583	3302	3243	2602
CG1628	-0.963943	2.94662	3.05276e-06	5.70277e-05	193	123	177	111	69	81
Jheh1	0.705146	3.97899	3.09476e-06	5.77338e-05	227	141	214	348	352	284
SKIP	0.553902	7.38996	3.11986e-06	5.81232e-05	2970	1860	1880	3887	3222	3006
Awh	1.00269	1.96617	3.12932e-06	5.82205e-05	42	41	39	86	103	67
ran	-0.419845	9.98644	3.19364e-06	5.93369e-05	21435	17362	17838	14780	16075	13182
east	0.702931	7.2584	3.20218e-06	5.94154e-05	2615	1668	1477	3895	2788	2919
E(spl)mbeta-HLH	0.52781	6.92471	3.20654e-06	5.94161e-05	1757	1382	1703	2560	2781	1962
jing	0.603264	6.63037	3.22762e-06	5.97261e-05	1738	1053	1093	2370	1947	1744
CG1815	0.440835	7.87746	3.28033e-06	6.06201e-05	3773	2837	3140	5000	4417	4286
Prx6005	-0.457007	5.61087	3.28766e-06	6.06739e-05	1048	827	880	697	757	631
His2B:CG17949	-0.709821	3.96301	3.3164e-06	6.11223e-05	347	252	340	223	181	191
CG13454	3.62119	-1.17893	3.37042e-06	6.20347e-05	0	1	1	8	14	8
CG5987	0.749914	3.43305	3.38747e-06	6.22651e-05	121	120	144	234	238	206
unc-104	0.560259	4.94688	3.39767e-06	6.23692e-05	497	351	369	673	598	582
CG1441	1.42127	0.918112	3.40328e-06	6.2389e-05	9	18	19	47	44	39
mura	0.714599	5.95779	3.41014e-06	6.24314e-05	1064	679	580	1593	1169	1148
CG33496	-1.16432	2.13774	3.47811e-06	6.35911e-05	144	70	80	58	40	36
CG32512	1.2424	3.81297	3.48614e-06	6.36533e-05	156	121	125	408	438	161
Pex7	1.6752	0.26645	3.49814e-06	6.37877e-05	14	4	7	24	31	28
CG6405	-1.97801	-0.158299	3.52378e-06	6.41701e-05	17	20	24	5	9	2
l(2)35Bg	-0.467337	6.63798	3.54144e-06	6.44065e-05	2140	1784	1708	1383	1567	1286
Sesn	1.25745	1.78124	3.59686e-06	6.53279e-05	37	27	31	55	106	75
His2B:CG33908	-0.831233	2.62691	3.62973e-06	6.5838e-05	136	114	129	91	70	61
CG12717	0.562767	4.49243	3.74045e-06	6.75788e-05	334	278	269	427	495	429
CG3349	2.77767	-0.857526	3.73859e-06	6.75788e-05	1	1	3	15	14	9
Lcp65Ag1	-1.63951	0.592141	3.73186e-06	6.75788e-05	47	30	27	5	14	15
CG31648	-0.677872	3.41405	3.78206e-06	6.82409e-05	239	199	196	140	161	112
CG43107	-2.20006	-0.446574	3.79359e-06	6.83591e-05	20	16	14	2	6	3
Lip1	1.56462	0.683942	3.89809e-06	7.01504e-05	9	9	18	30	47	35
Ssadh	-0.453425	5.68863	3.97784e-06	7.14919e-05	1133	877	899	799	769	639
CG42340	0.975948	2.41943	4.05353e-06	7.27572e-05	61	49	61	150	103	98
CG11263	1.27712	0.913266	4.06788e-06	7.29196e-05	23	13	14	44	45	37
mex1	3.37807	-0.966232	4.0893e-06	7.3208e-05	1	0	2	6	19	11
CG1146	-0.559296	6.02724	4.11928e-06	7.36489e-05	1612	1061	1146	1047	903	730
CG31798	-1.35848	1.64351	4.16137e-06	7.42085e-05	98	61	55	37	16	32
Gyc76C	0.506437	6.61208	4.1571e-06	7.42085e-05	1566	1180	1205	1894	1890	1997
HDAC4	0.478434	5.598	4.20306e-06	7.48547e-05	807	588	584	1039	968	847
CG6362	1.38032	0.836199	4.29356e-06	7.62832e-05	22	10	13	42	35	44
Taf12L	-1.29907	1.10396	4.29436e-06	7.62832e-05	43	55	43	19	25	16
Aats-phe	-0.52975	4.47476	4.43289e-06	7.8541e-05	480	389	407	312	342	266
CG15745	0.757658	2.71072	4.42727e-06	7.8541e-05	94	69	70	137	152	120
CG11321	4.15965	-1.38962	4.52117e-06	8.00021e-05	0	1	0	6	10	9
CG8145	0.55279	4.47003	4.53284e-06	8.01054e-05	313	268	288	435	460	430
CG42727	0.560989	4.35056	4.54934e-06	8.02939e-05	324	233	245	423	458	347
CG42726	0.560989	4.35056	4.56297e-06	8.04311e-05	324	233	245	423	458	347
CG15027	-0.616232	4.46635	4.60636e-06	8.10919e-05	470	420	406	319	341	226
cib	-0.47127	10.0822	4.6188e-06	8.12071e-05	23106	18782	19533	17869	15925	12486
CG15279	0.776421	2.79736	4.9099e-06	8.62149e-05	92	77	76	133	164	139
CG31142	-0.440045	5.7314	4.93433e-06	8.65334e-05	1116	920	941	794	831	661
tipE	-2.36615	0.0598468	5.15142e-06	9.02252e-05	42	25	10	8	5	2
Rpn3	-0.432283	7.75471	5.26606e-06	9.21158e-05	4787	3497	3860	3399	3347	2605
Osi24	1.66571	2.78422	5.32791e-06	9.30794e-05	88	31	42	281	142	100
PH4alphaEFB	0.471841	5.92191	5.35463e-06	9.33091e-05	994	710	780	1312	1258	1005
st	3.7057	-1.11555	5.35218e-06	9.33091e-05	0	0	2	18	8	6
glob1	-0.745281	3.79479	5.5025e-06	9.56741e-05	288	273	277	156	171	192
kuz	0.610162	6.65639	5.50427e-06	9.56741e-05	1749	1129	1060	2463	1921	1796
CG41378	0.526449	5.27218	5.66754e-06	9.83876e-05	530	473	529	747	824	730
CG14079	-1.51966	0.375771	5.68731e-06	9.86064e-05	31	26	29	13	11	7
CG42524	-3.2625	-1.1136	5.70253e-06	9.86214e-05	13	6	12	1	1	1
psh	-1.61975	0.316543	5.70102e-06	9.86214e-05	38	27	19	10	10	8
Nep2	0.772509	6.85172	5.78589e-06	9.99374e-05	1875	1074	1266	3366	2267	1802
CG3430	-0.54906	6.05842	5.83624e-06	0.000100681	1381	1240	1221	807	1057	872
CG6259	-0.449894	6.3704	5.97162e-06	0.000102863	1748	1468	1435	1219	1255	1069
Ipk1	-0.540646	5.15619	5.97773e-06	0.000102863	714	610	724	537	513	422
EcR	0.573745	6.25155	6.0091e-06	0.000103274	1235	914	850	1419	1528	1634
Syp	0.887238	7.65963	6.05561e-06	0.000103943	3301	2109	1622	6145	3632	3575
fd64A	5.9207	-1.5102	6.06424e-06	0.000103962	0	0	0	7	13	3
Taz	-0.531479	5.03777	6.19784e-06	0.00010612	727	575	589	428	522	409
Smyd4	-1.35822	1.07809	6.23246e-06	0.00010658	53	34	54	29	15	13
CG17119	-1.60409	0.296084	6.38761e-06	0.000109097	27	28	27	8	15	5
CG43736	0.438982	7.1288	6.40848e-06	0.000109318	2258	1659	1891	2958	2754	2451
CG15529	-1.24145	1.82783	6.53703e-06	0.000111209	116	62	61	45	39	20
Gr93a	2.12277	-0.146484	6.53769e-06	0.000111209	7	4	3	29	12	23
mRpS31	-0.556812	5.31237	6.54363e-06	0.000111209	798	721	772	507	648	475
CG13386	-4.19235	-1.4269	6.72349e-06	0.000114125	9	6	9	0	0	1
miple2	0.41992	9.33844	6.7506e-06	0.000114444	9753	8188	8998	13484	13183	10960
zfh2	0.511024	8.67997	6.87658e-06	0.000116436	6501	5046	4993	8884	7162	8253
Pif1A	0.573525	7.08524	6.93154e-06	0.000117222	2109	1571	1658	3464	2526	2266
CG18336	1.21605	1.31049	6.97465e-06	0.000117806	30	17	22	51	74	42
mRpL36	-0.623768	4.00471	7.1444e-06	0.000120526	366	300	279	214	253	172
CG9603	-0.449514	7.78653	7.32946e-06	0.000123496	4871	3919	3663	3432	3475	2595
Su(P)	-0.571841	5.2504	7.42882e-06	0.000125017	902	693	629	540	611	406
CG7409	1.20405	1.53326	7.68023e-06	0.00012909	35	23	24	55	59	80
CG14182	-0.570973	4.08027	7.76936e-06	0.000130429	407	285	294	244	234	208
CG32809	0.51538	5.22099	8.04371e-06	0.000134869	526	434	528	766	752	696
CG33144	0.498366	5.2987	8.13541e-06	0.000136241	633	488	470	866	767	697
mRpS11	-0.482284	5.9276	8.26572e-06	0.000138255	1180	1143	1109	879	919	774
pan	0.502773	6.35198	8.46512e-06	0.000141418	1331	977	999	1665	1519	1640
CG7137	-0.491172	5.16552	8.65413e-06	0.0001444	768	586	688	519	551	441
nrv3	5.81816	-1.59261	8.80202e-06	0.00014669	0	0	0	3	8	10
CG13749	0.947032	2.13227	8.81875e-06	0.00014679	48	46	47	82	117	85
sol	0.450064	6.79854	9.09418e-06	0.000151192	1919	1290	1411	2272	2288	1954
CG33062	0.684127	3.85852	9.18721e-06	0.000152554	174	170	190	276	327	293
Itp-r83A	0.453801	7.18969	9.34279e-06	0.000154951	2431	1726	1880	3097	2747	2690
Act5C	-0.418969	12.7597	9.62823e-06	0.000159492	155674	114030	119232	110389	104464	86771
RpL10	-0.453054	11.8179	9.75378e-06	0.000161377	70703	67170	64346	50348	56698	47465
CG10631	0.445397	6.95796	9.80975e-06	0.000162108	1968	1554	1614	2719	2379	2167
CG14446	1.04914	4.53769	1.00515e-05	0.00016574	381	221	147	671	434	471
CG32409	-0.427894	6.65658	1.00536e-05	0.00016574	2246	1689	1726	1516	1556	1291
Adar	0.425074	6.72187	1.04618e-05	0.000172263	1652	1334	1404	2203	2067	1857
CG16710	0.994056	2.27835	1.04989e-05	0.000172469	61	40	53	88	141	90
CG9586	-0.441605	5.76074	1.04994e-05	0.000172469	1130	984	922	833	821	677
ed	0.428637	9.58976	1.08131e-05	0.00017741	13096	9359	9776	16149	14537	14064
sesB	-0.424448	10.7532	1.10124e-05	0.000180465	36754	30952	28757	27064	26517	21353
CG4049	0.532269	5.91586	1.11172e-05	0.000181965	1020	750	649	1376	1191	1050
CG43326	-1.01542	2.0752	1.11844e-05	0.000182847	105	76	88	33	65	40
CG18600	-0.430249	5.83651	1.14187e-05	0.000186455	1210	1005	979	811	908	746
Spn77Ba	0.389958	7.50788	1.15021e-05	0.000187595	2972	2256	2469	3687	3734	3058
CG1718	0.967763	4.03652	1.15206e-05	0.000187674	202	196	138	268	388	425
CG7953	5.85756	-1.55191	1.15821e-05	0.000188452	0	0	0	6	13	3
spict	-0.473048	5.41027	1.16028e-05	0.000188566	977	681	761	605	667	532
CG10440	-0.532692	5.16737	1.16524e-05	0.000189149	839	618	620	584	487	418
dan	4.03895	-1.4679	1.18617e-05	0.00019232	0	1	0	9	7	7
mod	-0.391071	9.65691	1.19647e-05	0.00019376	16993	13818	13880	12540	12345	10559
cer	-0.561657	4.90521	1.23154e-05	0.000199205	608	559	562	377	450	394
Caf1	-0.394252	8.81778	1.23611e-05	0.000199709	9392	7497	8107	6517	7154	6090
CG5946	-0.43632	6.4035	1.26325e-05	0.000203855	1758	1464	1516	1214	1336	1096
CG9515	-0.748325	4.0675	1.27079e-05	0.000204832	422	355	246	204	237	190
CG9510	-0.748325	4.0675	1.27267e-05	0.000204894	422	355	246	204	237	190
obst-B	0.442072	7.24528	1.27686e-05	0.000205328	2622	1792	1904	2973	3158	2721
CG9948	0.504872	4.55889	1.27959e-05	0.000205526	350	299	295	487	503	406
beta4GalNAcTB	-0.540306	4.66304	1.28449e-05	0.000206073	555	457	447	345	336	357
ATPsyn-Cf6	-0.403832	7.48541	1.31397e-05	0.000210556	3868	3099	3000	2659	2905	2271
Eno	-0.449538	8.90774	1.31772e-05	0.000210912	11376	7672	8224	7790	7009	5843
Bx	0.566137	5.20862	1.32451e-05	0.000211753	634	436	392	702	828	698
CG10426	0.7366	2.9856	1.33877e-05	0.000213783	108	83	94	193	148	152
Obp93a	2.87162	-1.02329	1.34584e-05	0.000214662	0	2	2	9	15	9
CG31785	1.19494	1.45572	1.35302e-05	0.000215558	29	29	19	81	61	43
CG16719	0.935806	1.91056	1.3668e-05	0.000217502	54	38	30	79	80	82
CG16888	-1.53652	0.296579	1.37041e-05	0.000217824	25	25	31	9	14	6
Arp1	-0.394254	7.54321	1.43514e-05	0.000227849	4087	3099	3177	2941	2882	2363
CG7852	0.469955	5.70209	1.45289e-05	0.000230401	869	563	706	1087	1017	951
Vha13	-0.45314	6.66712	1.47019e-05	0.000232875	2376	1691	1695	1574	1557	1228
kis	0.467216	9.61627	1.48382e-05	0.000234765	13180	9499	9649	17695	14196	14234
eIF-2alpha	-0.392089	7.65049	1.49032e-05	0.000235522	4457	3326	3383	3084	3104	2627
Arf79F	-0.386818	9.96008	1.49277e-05	0.000235635	20556	17119	17328	15306	15142	13319
CG42368	1.42383	0.653882	1.49447e-05	0.000235635	13	8	17	34	46	27
CG10639	-0.557353	3.89751	1.49681e-05	0.000235735	309	267	282	217	215	176
Bruce	0.453025	8.24115	1.53315e-05	0.000241182	5004	3782	3721	6764	5497	5446
Arpc2	-0.381943	7.76131	1.54733e-05	0.000243134	4636	3569	3790	3327	3297	2922
Pka-C3	0.853546	3.98091	1.56982e-05	0.000246387	252	133	166	443	332	252
CG12883	-0.663374	3.43745	1.59413e-05	0.000249632	231	218	191	137	164	121
Rbcn-3B	0.582796	5.08419	1.59308e-05	0.000249632	560	371	399	821	631	604
BtbVII	0.531673	5.07183	1.63016e-05	0.000254983	583	374	392	706	674	626
CG42233	-0.508535	4.62391	1.65213e-05	0.000258126	535	418	455	323	372	331
CG7433	-1.20671	1.12837	1.71459e-05	0.000267581	46	52	43	23	28	13
Ggt-1	-0.750654	2.57042	1.73208e-05	0.000270004	131	106	120	72	73	75
ths	0.476992	6.00175	1.77993e-05	0.000277149	949	853	798	1174	1346	1241
CG12003	1.13003	1.61532	1.78249e-05	0.000277233	42	23	25	71	89	45
Tif-IA	-0.422087	7.45762	1.79828e-05	0.000279373	3346	3165	3236	2612	2634	2361
Nep1	0.822195	4.02641	1.81334e-05	0.000281396	269	134	175	440	325	284
Gprk1	-0.436131	7.50805	1.81783e-05	0.000281774	3651	3057	3468	2500	2689	2619
NHP2	-0.430982	7.22343	1.88439e-05	0.000291763	3215	2594	2564	2202	2448	1821
usnp	-0.472862	5.40056	1.89566e-05	0.000293177	911	673	810	607	675	512
tutl	0.457235	7.11032	1.91391e-05	0.000295666	2360	1608	1749	3009	2610	2476
bcd	1.40914	0.9818	1.93708e-05	0.000298911	20	20	9	62	36	38
CG11737	-0.500383	4.97367	1.94665e-05	0.000299987	682	512	599	433	495	389
Egfr	0.451735	8.64306	1.94842e-05	0.000299987	6862	4681	5051	9069	7808	6603
Gap1	0.426524	6.59203	1.97195e-05	0.000303269	1630	1166	1235	1998	1874	1726
Camta	0.669012	5.07071	2.01309e-05	0.000309251	565	362	348	837	588	654
CG42342	0.521263	6.35649	2.03359e-05	0.000312052	1384	849	1075	1895	1600	1404
klu	0.564092	5.73006	2.06378e-05	0.000316331	928	522	661	1266	1059	888
CG31635	0.469309	6.53814	2.06834e-05	0.000316677	1403	1142	1248	1820	1746	1868
CG10211	0.545655	5.87371	2.08437e-05	0.000318143	1020	697	626	1374	1156	999
CG42759	1.13753	1.2756	2.08629e-05	0.000318143	29	20	21	45	52	62
sca	0.571857	5.75928	2.08246e-05	0.000318143	967	534	650	1267	1021	987
smt3	-0.398038	9.78164	2.08717e-05	0.000318143	17637	14859	16189	12807	14141	11585
Rpb10	-0.487228	5.85265	2.09683e-05	0.000318908	1073	1047	1137	797	905	735
sls	0.740669	5.85081	2.09654e-05	0.000318908	895	746	473	1324	1027	1276
Hsp83	-0.435548	11.6453	2.1093e-05	0.00032045	66320	54377	58736	43531	54018	40781
bbg	0.392993	8.33633	2.11598e-05	0.00032111	5321	3938	4409	6822	6357	5448
Spn43Aa	1.45202	7.39086	2.12108e-05	0.000321175	1779	889	1753	7457	3505	1762
Syx4	2.83149	-1.05432	2.12034e-05	0.000321175	2	2	0	11	14	7
CG34383	0.658839	6.33825	2.15853e-05	0.000326215	1380	914	799	2033	1395	1575
ds	0.450507	9.4694	2.15911e-05	0.000326215	12006	8936	8440	15802	13207	12496
CG10103	-0.442268	6.46837	2.16953e-05	0.00032743	1933	1446	1605	1367	1405	1046
CG30020	0.389794	7.40186	2.20374e-05	0.000331501	2655	2196	2278	3240	3305	3146
CG4294	0.412472	7.25222	2.20369e-05	0.000331501	2350	1949	2067	3015	2978	2808
CG5921	1.39554	1.10362	2.20208e-05	0.000331501	23	15	16	72	48	29
Pkc53E	3.52948	-1.24598	2.2403e-05	0.000336633	1	1	0	15	5	8
CG8405	0.475971	6.30409	2.30248e-05	0.000345598	1289	1012	928	1718	1470	1458
CG9521	1.40931	1.16798	2.31161e-05	0.000346591	29	18	10	36	59	60
SerT	-1.41722	1.80581	2.35295e-05	0.000352404	139	48	59	37	35	21
GstD3	-0.475293	6.24597	2.37842e-05	0.000355832	1511	1462	1303	1072	1124	1015
Mlc2	-0.960928	4.66665	2.38791e-05	0.000356476	550	598	470	182	349	333
Oscp	-0.414803	7.80556	2.38607e-05	0.000356476	5069	3762	3698	3487	3574	2697
otk	-0.554434	6.48219	2.39795e-05	0.000357586	2219	1404	1612	1511	1137	1030
CG2121	1.17692	1.04991	2.41753e-05	0.000360116	22	19	17	43	41	52
flfl	0.528951	7.43703	2.44228e-05	0.000363016	3054	1999	1941	4008	3075	3266
P32	-0.39061	7.5893	2.44055e-05	0.000363016	4071	3354	3231	2954	3084	2429
CG15293	-4.27002	-1.35454	2.44909e-05	0.000363635	17	4	5	1	0	0
CG10077	0.38715	9.27604	2.45266e-05	0.000363771	9673	7713	8796	12469	12196	10937
Hsepi	0.418786	5.73566	2.46723e-05	0.000365538	906	661	663	1103	1047	934
Sema-1b	0.405697	8.73758	2.51257e-05	0.000371855	7318	5375	5313	8908	8116	7613
CG9691	-0.702236	5.90111	2.53474e-05	0.000374732	1601	1050	995	1017	787	522
CG30183	0.425022	6.00798	2.55099e-05	0.00037673	1048	828	804	1366	1257	1112
CG6144	-0.509078	4.4511	2.57122e-05	0.000379311	444	386	414	301	341	270
Hexo2	1.56666	0.314759	2.5777e-05	0.000379858	6	11	10	31	36	18
kappaB-Ras	-0.529006	4.41353	2.58047e-05	0.000379859	490	355	382	314	276	288
CG14963	0.929241	2.88984	2.59717e-05	0.000381909	73	103	65	180	169	136
CG4497	0.491211	4.86522	2.65443e-05	0.000389912	452	351	375	568	600	548
CG30026	2.62871	-0.965633	2.68262e-05	0.000393633	2	0	3	9	13	12
CG40002	-0.435666	7.80538	2.69004e-05	0.000393881	4229	4194	4016	3286	3536	2832
CG7997	-1.483	1.62401	2.6892e-05	0.000393881	92	88	35	30	20	29
mth	0.380841	7.78939	2.69336e-05	0.000393947	3517	2799	3054	4598	4307	3785
CG8317	-0.80305	2.32853	2.6987e-05	0.000394308	120	80	106	67	67	48
CG8675	-0.506906	4.88868	2.70455e-05	0.000394743	606	547	532	426	456	357
CG7896	0.413956	7.62862	2.78218e-05	0.000405213	3298	2359	2653	4359	3752	3360
scrib	0.473258	8.18927	2.7805e-05	0.000405213	4999	3385	3631	6216	5168	5733
eIF4G2	0.513287	6.15882	2.78563e-05	0.000405288	1197	861	827	1594	1278	1368
CG7156	0.495811	4.5298	2.79449e-05	0.000406147	383	279	272	481	461	420
CG16798	0.82343	2.41365	2.80141e-05	0.000406722	72	60	51	101	138	98
CG7048	-0.438681	6.86307	2.82642e-05	0.00040992	2400	2030	2088	1740	1919	1371
CG5098	0.425481	6.26372	2.8343e-05	0.00041063	1224	929	1046	1615	1497	1347
Gug	0.440858	7.69641	2.8562e-05	0.000413368	3582	2429	2634	4543	3786	3759
Buffy	-1.1629	1.00015	2.88025e-05	0.000416409	54	43	31	21	20	18
CG42531	-2.84528	-1.11335	2.90489e-05	0.000419531	12	7	11	2	1	1
dlg1	0.658711	5.33295	2.9812e-05	0.0004301	721	443	379	975	760	757
CG31688	0.541817	5.39743	3.00508e-05	0.00043309	732	471	483	981	780	764
CG13650	-1.11752	1.05727	3.03282e-05	0.000436175	50	33	49	22	24	17
CG8366	0.516082	5.10942	3.02993e-05	0.000436175	500	409	469	708	797	556
skd	0.413839	7.34841	3.1203e-05	0.000448286	2668	2084	2075	3503	2940	2971
CG8105	1.43347	0.304519	3.13942e-05	0.000450562	10	9	10	25	30	27
Mlc-c	-0.372624	8.0555	3.18698e-05	0.000456912	5406	4493	4719	3975	4238	3545
CG3216	-1.9177	0.447605	3.20964e-05	0.00045968	53	32	13	9	7	10
lea	0.396194	8.56439	3.215e-05	0.000459969	6384	4628	5003	8078	7154	6577
glec	0.468887	6.01104	3.34619e-05	0.00047824	1024	727	891	1468	1214	1111
T-cp1	-0.411947	9.31303	3.38392e-05	0.000483131	14424	10701	10481	10251	9754	7763
CG32486	0.447738	6.14395	3.3964e-05	0.00048441	1049	832	1027	1437	1434	1258
stl	2.45822	-0.708876	3.46097e-05	0.000493107	2	1	4	23	11	8
CG6287	0.769066	7.2195	3.46973e-05	0.000493844	2413	1304	1735	4358	3164	2101
CG31917	-0.426921	5.66434	3.48778e-05	0.000495448	1012	895	915	726	819	647
Tfb5	-0.426921	5.66434	3.48821e-05	0.000495448	1012	895	915	726	819	647
Tsp66E	-0.456919	6.21575	3.51785e-05	0.000499143	1569	1267	1352	984	1107	1068
CG8180	0.555243	4.82456	3.53318e-05	0.000500801	433	292	393	544	597	556
Reph	0.722521	3.6695	3.54024e-05	0.000501285	202	133	132	324	228	242
CG17230	0.465127	4.97082	3.55947e-05	0.000503489	486	372	423	650	627	559
CG2124	-0.560115	3.92286	3.60219e-05	0.000509008	341	248	289	222	194	200
su(w[a])	0.367762	8.46124	3.6431e-05	0.00051426	5923	4417	4719	7022	7013	6097
Zw	-0.490444	5.24222	3.66326e-05	0.000516576	880	614	670	617	541	439
CG15528	-1.35045	0.429476	3.67363e-05	0.000517085	37	23	27	13	9	13
Ephrin	0.40233	7.50611	3.67439e-05	0.000517085	2919	2439	2276	3557	3458	3435
mthl5	-0.40087	7.00611	3.67865e-05	0.000517155	2773	2180	2191	2025	1976	1624
ttk	0.507507	6.96124	3.71328e-05	0.000521491	2050	1454	1540	3053	2378	2010
mey	-0.481039	6.53597	3.72156e-05	0.00052212	2163	1336	1812	1412	1341	1173
CG6191	0.483259	6.02667	3.74364e-05	0.000524683	986	767	894	1215	1278	1331
CG18522	-1.26902	0.730514	3.75193e-05	0.000525309	39	28	40	21	14	11
CG7294	-1.09563	1.26878	3.76287e-05	0.000526305	69	42	43	18	31	25
Mrtf	0.610006	5.71242	3.78911e-05	0.000529435	956	548	549	1236	944	1016
CG5367	-1.16039	1.14793	3.83236e-05	0.000534935	65	41	37	30	22	14
Kdm4A	0.513385	4.92466	3.8392e-05	0.000535346	485	393	340	591	661	551
CG2865	0.642596	4.36234	3.8542e-05	0.000536894	347	248	190	464	420	379
CG34187	1.50698	0.257389	3.86853e-05	0.000538344	11	9	7	29	21	30
CG32230	-0.484551	7.49652	3.92589e-05	0.000545774	3475	3628	3074	2438	2937	2265
capt	-0.415002	8.04568	3.97647e-05	0.000552247	5699	4124	4946	4353	3974	3194
Ef1alpha100E	1.51681	5.60744	3.98617e-05	0.000553035	561	275	410	2322	941	467
Aats-tyr	-0.397182	7.27851	3.99721e-05	0.000554008	3442	2552	2646	2412	2402	1988
if	0.486293	6.63168	4.00322e-05	0.000554282	1675	1108	1272	2312	1816	1735
Pde11	0.492363	5.54607	4.26388e-05	0.00058978	827	546	534	1025	897	839
app	0.565207	5.21645	4.28201e-05	0.000591322	629	469	370	834	719	687
svp	0.889178	2.62427	4.28363e-05	0.000591322	100	47	62	154	115	127
CG2493	0.372116	8.17502	4.29356e-05	0.000592098	4875	3585	3873	5903	5851	4805
Art8	-0.424885	5.65393	4.33095e-05	0.000596089	1019	915	867	738	807	634
lilli	0.521753	6.10997	4.33118e-05	0.000596089	1220	761	812	1564	1264	1286
CG3857	0.457597	6.13959	4.36119e-05	0.00059962	1226	853	836	1423	1534	1183
CG1637	0.477838	4.85919	4.4224e-05	0.000607428	446	341	392	574	601	529
CG12951	5.50477	-1.78028	4.4617e-05	0.000611469	0	0	0	8	5	4
CG17202	-0.43884	5.5793	4.46409e-05	0.000611469	1049	773	865	677	800	583
Tim9a	-0.453295	5.38251	4.46516e-05	0.000611469	849	783	706	599	638	544
eap	0.625925	3.46344	4.48743e-05	0.000613908	680	573	568	571	564	422
CG3987	0.912703	1.88812	4.61771e-05	0.000631103	52	41	28	91	84	62
CG4038	-0.414886	6.90188	4.62637e-05	0.000631481	2330	2137	2159	1752	1866	1576
RpL36A	-0.383294	10.7267	4.62967e-05	0.000631481	34113	29970	29208	24914	27200	22496
mthl15	-1.14542	1.05576	4.64468e-05	0.000632901	43	49	40	22	17	23
CG13731	1.02842	2.85365	4.65235e-05	0.000633318	121	53	58	207	138	137
CG32676	0.41417	7.01851	4.70936e-05	0.000640445	2175	1484	1788	2689	2572	2247
CG7054	-0.507373	5.18208	4.74641e-05	0.000644846	720	689	653	526	587	410
babos	-0.469135	7.10022	4.80372e-05	0.000651988	2991	2325	2463	2240	2152	1481
trol	0.553716	8.31173	4.81214e-05	0.000652487	5564	3770	3363	7798	5713	5658
Rab6	-0.442288	6.67425	4.81694e-05	0.000652494	2315	1688	1759	1713	1460	1227
trpm	0.441379	6.03294	4.82482e-05	0.000652918	1049	847	811	1289	1252	1261
cnn	0.425352	6.82196	4.94153e-05	0.000668054	1672	1418	1600	2127	2285	2137
Mrp4	-1.13216	1.1541	4.95903e-05	0.000669761	55	51	36	27	17	23
CG43902	1.97894	-0.530927	4.97131e-05	0.000670762	6	2	3	12	20	14
olf413	0.376658	7.32804	5.03332e-05	0.000678461	2568	2090	2156	3339	3127	2738
capu	0.396553	6.79799	5.0797e-05	0.000684043	1737	1360	1583	2252	2255	1904
CG5220	-0.451312	5.54696	5.11799e-05	0.000688525	912	826	878	703	745	557
His1:CG31617	-0.63876	3.1851	5.15347e-05	0.00069262	185	180	167	121	119	116
stai	0.410394	9.29529	5.18213e-05	0.000695791	9825	7385	9120	13537	11932	10895
CG9705	-0.37368	8.43512	5.28259e-05	0.000708588	7286	5612	6182	5125	5713	4476
rn	0.47965	7.02916	5.37945e-05	0.000720877	2382	1512	1489	2821	2570	2317
scyl	0.537929	8.21625	5.39111e-05	0.000721737	4949	3473	3494	7665	5443	4819
CG9706	-0.479953	4.45459	5.44458e-05	0.000728186	442	400	394	328	325	272
CG13083	1.75627	-0.145729	5.45174e-05	0.000728435	3	6	8	27	17	17
CG10306	-0.367056	7.81107	5.49285e-05	0.000733216	4548	3735	4037	3438	3649	2877
CG11089	-0.407436	7.21768	5.50191e-05	0.000733712	3336	2525	2448	2386	2220	1889
CG31381	-0.407435	7.21768	5.51182e-05	0.000734322	3336	2525	2448	2386	2220	1889
Atx2	0.542964	6.44341	5.5262e-05	0.000734814	1568	928	1003	2077	1642	1514
CG7970	0.416322	6.53437	5.52217e-05	0.000734814	1487	1131	1257	1977	1925	1484
RpL15	-0.434343	11.3501	5.54511e-05	0.000736615	49701	47735	47815	35484	42050	34975
CG9194	-0.623217	4.87651	5.61461e-05	0.000744782	585	531	606	328	487	355
eIF-3p66	-0.363023	9.01153	5.61742e-05	0.000744782	11284	8246	8913	8145	7928	6834
kto	0.400973	7.21157	5.72399e-05	0.000758181	2525	1813	1921	3068	2814	2654
Ant2	-0.498047	4.3231	5.80925e-05	0.000767903	397	356	380	278	293	265
eIF-1A	-0.367883	8.35703	5.80564e-05	0.000767903	7092	5499	5475	5253	4987	4289
fbp	-0.489988	6.58133	5.81415e-05	0.000767903	2130	1673	1660	1595	1465	1005
mei-W68	0.637789	3.93031	5.86822e-05	0.000774301	238	183	158	369	278	285
CG32187	3.31038	-1.39021	5.95622e-05	0.00078452	1	1	0	12	5	7
CG8249	0.954748	2.26832	5.95708e-05	0.00078452	68	51	37	138	94	82
CG11905	1.14206	3.18053	6.00709e-05	0.000790349	109	66	97	323	178	127
CG9422	0.444159	5.01819	6.01346e-05	0.00079043	501	397	436	638	672	576
Cad99C	0.392934	7.96053	6.17887e-05	0.000811397	4254	2990	3316	5320	4627	4378
alphaTub84B	-0.406734	12.2872	6.21449e-05	0.000815296	115124	79161	85722	81541	75990	61155
tow	-1.21758	0.640544	6.2323e-05	0.000816853	37	27	35	17	14	13
htt	0.456512	6.59356	6.32847e-05	0.000828667	1602	1170	1213	2133	1700	1809
RpS3A	-0.424403	11.9783	6.346e-05	0.000830173	76380	73178	74281	55855	64345	54369
fwd	0.422622	7.22154	6.36125e-05	0.000831377	2532	1899	1815	3156	2774	2716
SmG	-0.387988	6.90019	6.43283e-05	0.000839933	2432	2045	2112	1761	1912	1573
Chd1	0.420755	7.17786	6.45365e-05	0.000841852	2497	1754	1824	3178	2836	2403
CG9392	2.09499	-0.549477	6.47748e-05	0.00084416	0	4	6	13	19	14
nudC	-0.371417	7.48937	6.5346e-05	0.000850798	3642	3116	3105	2797	2915	2252
CG43759	0.411736	6.41159	6.55402e-05	0.000851723	1404	1006	1162	1758	1618	1538
rk	1.35932	1.24287	6.5541e-05	0.000851723	26	13	22	81	53	30
CG10472	1.70842	-0.179169	6.56166e-05	0.0008519	4	7	6	24	21	14
ImpL3	-1.12902	3.50483	6.5908e-05	0.000854877	339	193	230	190	107	65
SamDC	-0.438486	5.21959	6.61088e-05	0.000856672	784	607	696	523	562	512
CG4313	-0.593563	3.52476	6.67237e-05	0.000863827	253	220	196	143	165	152
mRpL12	-0.40564	5.8457	6.68993e-05	0.000865285	1308	929	973	860	937	714
PNUTS	0.368266	8.09757	6.72863e-05	0.000869473	4390	3394	3883	5705	5375	4587
CG12560	-1.10053	1.14875	6.75277e-05	0.000871773	49	55	36	27	21	20
CG14855	2.3345	-0.26483	6.77192e-05	0.000872607	3	4	4	36	12	12
CG2641	-0.545212	4.15958	6.76907e-05	0.000872607	388	309	332	230	241	258
CG11267	-0.41897	7.50163	6.87311e-05	0.000884816	3663	3216	3199	2690	3099	2113
CG13293	0.821839	2.08524	6.92497e-05	0.000890659	44	48	52	95	86	85
salm	0.373454	7.56513	7.00933e-05	0.000900666	3299	2345	2448	3864	3627	3333
RpL34a	-0.355034	8.30175	7.04373e-05	0.000904241	6677	5040	5594	4786	5044	4216
ihog	0.395512	8.39535	7.16183e-05	0.000917689	5955	4046	4296	7127	6457	5815
pum	0.523231	6.47549	7.15833e-05	0.000917689	1601	1005	996	2096	1668	1555
CG32264	0.4768	6.43817	7.26614e-05	0.000930187	1551	944	1078	1929	1655	1527
CG42346	0.91832	1.65919	7.31178e-05	0.00093516	36	26	40	78	66	57
CG42389	0.67866	6.06571	7.38336e-05	0.000943437	1165	706	674	1852	1184	1148
CG13215	-5.48054	-1.82879	7.39964e-05	0.000944639	5	6	5	0	0	0
CG14645	-0.605932	3.67464	7.42778e-05	0.000947352	261	243	239	182	200	130
Lcp65Ag3	-1.48462	0.364064	7.47651e-05	0.000952683	37	27	21	4	13	14
CG43143	0.529688	5.28837	7.50198e-05	0.000955044	692	396	486	898	765	674
CG14949	2.25663	-0.855815	7.51911e-05	0.000956339	3	3	1	8	13	15
CG13775	-0.699108	2.89531	7.5616e-05	0.000960855	167	140	136	91	86	105
CG30284	-1.40338	0.37832	7.63024e-05	0.000968681	24	23	37	10	13	10
CG10383	-0.59605	4.0345	7.86166e-05	0.00099714	403	270	290	195	227	232
hoip	-0.407911	7.30329	7.90094e-05	0.0010012	3335	2642	2810	2200	2668	2024
Vps28	-0.406448	5.46053	8.04546e-05	0.00101857	937	736	773	648	712	559
proPO-A1	2.76704	-0.8587	8.08129e-05	0.00102123	2	2	1	7	24	7
Tsp68C	1.04643	1.44971	8.07601e-05	0.00102123	32	17	34	51	60	66
CG7985	0.468042	5.15486	8.22306e-05	0.00103819	603	393	467	722	781	592
CG14619	0.420939	6.06649	8.23201e-05	0.00103837	1099	876	821	1411	1291	1180
ex	0.376136	9.20348	8.2914e-05	0.0010449	9621	7614	7821	11538	11009	11087
Con	1.68071	1.40612	8.2999e-05	0.00104501	25	13	20	113	56	27
CG42533	0.422325	6.34841	8.37739e-05	0.00105284	1363	1005	1038	1748	1499	1471
CG4764	-0.42206	5.9294	8.37362e-05	0.00105284	1195	1014	1178	949	948	747
Cyp4e1	-1.46045	0.116601	8.41145e-05	0.00105616	33	20	17	10	8	8
Klp61F	-0.36277	8.3348	8.45824e-05	0.00106106	6601	5440	5657	4670	5063	4558
CG15629	-0.919974	1.89583	8.47108e-05	0.0010617	85	65	81	31	45	50
CG6785	-0.862651	1.973	8.49626e-05	0.00106389	75	85	79	53	50	35
CG3326	0.615455	3.50802	8.56462e-05	0.00107147	180	131	124	215	276	200
CG8034	0.425606	6.01621	8.59136e-05	0.00107384	1039	862	790	1196	1309	1237
Got2	-0.351434	7.72071	8.68608e-05	0.0010847	4494	3390	3678	3181	3419	2804
CG30094	-0.54426	3.62596	8.94709e-05	0.00111628	263	221	224	158	181	165
LKR	0.607217	3.26284	9.13994e-05	0.0011393	129	110	126	216	207	158
CG31262	1.00828	2.0229	9.25505e-05	0.00115258	46	49	32	67	98	100
Syb	-0.358548	7.8091	9.26326e-05	0.00115258	4431	3872	3944	3487	3577	2914
CG33054	-0.56102	4.52541	9.32199e-05	0.00115884	448	448	428	279	338	319
tna	0.399449	7.82659	9.39515e-05	0.00116688	3933	2594	3089	4928	4371	3809
CHMP2B	-0.49927	4.15807	9.46331e-05	0.00117429	378	331	304	275	248	223
Hsc70-2	2.15134	-0.780224	9.5359e-05	0.00118223	4	0	4	13	11	14
mus101	0.387336	5.67124	9.55984e-05	0.00118413	853	648	654	999	990	927
CG42241	1.59454	-0.19545	9.56952e-05	0.00118426	8	4	6	18	19	20
CG8012	3.31821	-1.38838	9.66373e-05	0.00119484	0	1	1	4	8	12
CG31522	0.413599	6.26899	9.68149e-05	0.00119596	1306	999	929	1554	1508	1392
CG14253	0.486735	4.12023	9.8031e-05	0.00120981	267	200	235	352	376	295
rept	-0.346479	7.46621	9.81113e-05	0.00120981	3826	2820	3042	2697	2835	2364
CG13722	-1.74536	-0.46654	9.91366e-05	0.00122135	18	16	12	8	3	3
sqz	0.427115	5.18724	9.94251e-05	0.00122381	553	443	513	712	739	658
CG16711	0.605386	4.40267	9.96486e-05	0.00122445	359	232	230	502	374	407
Cyp28d1	-3.86246	-1.63633	9.9655e-05	0.00122445	7	6	6	0	0	1
CG3609	0.38093	5.93666	0.000100821	0.00123767	1009	747	841	1218	1247	1044
Art1	-0.350267	8.27421	0.000101984	0.00125083	6594	5160	5202	4817	4975	4030
mei-41	0.431331	5.41791	0.000104972	0.00128633	727	519	534	868	803	804
CG10730	0.747988	2.42503	0.000106795	0.00130634	73	47	71	104	128	101
RhoGAP19D	0.423403	6.56418	0.000106701	0.00130634	1643	1137	1186	2077	1768	1646
mp	0.56421	4.313	0.000107844	0.001318	314	233	233	469	347	376
CG1746	-0.355897	10.1856	0.000108179	0.00132092	23986	19946	19802	18120	18867	14937
CG31223	-0.491341	4.87067	0.000108972	0.00132942	603	524	531	379	437	409
Cad87A	0.382742	7.79803	0.00011172	0.00136174	3870	2779	2827	4767	4169	3833
Cpr49Ah	0.982885	5.58856	0.00011257	0.00137089	560	614	387	608	1334	1255
E(Pc)	0.3978	7.68351	0.000112919	0.00137392	3563	2538	2602	4525	3779	3544
CG12054	0.513313	5.50364	0.000113307	0.00137742	799	558	478	1002	838	852
CG13144	-0.643084	3.44932	0.000114263	0.00138781	220	198	223	133	180	117
blw	-0.351222	10.077	0.000114903	0.00139435	23394	17262	18640	17075	17181	13975
Ude	-1.09513	2.97968	0.000115714	0.00140296	150	177	186	56	79	114
CG5399	3.05879	-0.642129	0.00011597	0.00140412	2	0	3	29	15	3
cpa	-0.396077	7.31607	0.000116015	0.00140412	3508	2666	2685	2676	2401	1923
CG12343	-0.395612	7.15476	0.0001168	0.00141238	2735	2504	2609	2059	2257	1918
dbr	0.373562	7.03109	0.000118056	0.00142632	2073	1681	1796	2620	2497	2349
CG12974	1.72217	-0.244825	0.000119123	0.00143794	3	6	7	24	15	17
RpL27	-0.352105	10.6729	0.000121376	0.00146385	35371	26059	28220	24546	26629	21633
CG31712	0.407871	6.6927	0.000123132	0.00148374	1570	1234	1522	2058	1985	1916
wah	0.399574	7.29445	0.000124625	0.00150041	2766	1901	1982	3273	2991	2778
CG13300	0.473733	5.79876	0.000125234	0.00150642	1025	608	665	1242	1116	925
ana1	0.403934	6.29258	0.000126865	0.00152471	1334	984	984	1664	1497	1360
CG11873	0.352338	7.53494	0.000127843	0.00153378	3019	2352	2578	3682	3468	3364
CG3420	-0.399787	5.88453	0.000127772	0.00153378	1259	1023	994	927	948	713
slpr	0.442179	6.07043	0.00012805	0.00153492	1164	750	883	1479	1289	1154
nonC	0.439913	6.85086	0.000128406	0.00153785	1993	1361	1455	2626	2092	2014
CG8635	-0.362767	7.07026	0.000130268	0.0015588	2811	2210	2356	2083	2116	1765
CG2678	1.56433	-0.213416	0.000132007	0.0015775	8	4	6	22	19	15
S	0.546937	5.11289	0.000132061	0.0015775	585	385	408	856	625	597
stau	0.382139	6.93662	0.000132175	0.0015775	2094	1508	1607	2542	2324	2152
CG32267	-0.457116	5.66978	0.000132388	0.00157867	949	1009	883	747	752	671
CoVIIc	-0.395585	7.42532	0.000133486	0.00159002	3412	3178	2888	2569	2873	2109
RpL23	-0.349462	10.7472	0.000133572	0.00159002	37668	27920	28772	26811	27402	22548
Corin	-1.46417	0.0670504	0.000133879	0.0015923	22	22	23	6	8	11
Cct1	-0.390348	5.69825	0.000134731	0.00159854	1170	857	855	816	758	699
CG3560	-0.420325	6.94288	0.000134729	0.00159854	2418	2316	2091	1841	1996	1511
x16	-0.34708	7.43123	0.000134752	0.00159854	3617	2866	2949	2501	2751	2435
CG1434	0.555084	4.07535	0.000135126	0.00160159	296	192	179	335	375	300
CG9667	-0.484262	5.2071	0.000136905	0.00162128	830	641	631	621	544	401
cu	0.55021	3.66401	0.000137604	0.00162682	194	130	174	277	263	217
Mco1	1.45492	0.178585	0.00013761	0.00162682	12	10	4	30	30	15
Karybeta3	-0.339408	9.37617	0.000138551	0.00163654	14117	10714	11469	10367	10154	9199
RhoGAPp190	0.402625	7.69935	0.000139113	0.00164177	3649	2490	2656	4601	3807	3588
tsu	-0.368275	6.6157	0.000139625	0.00164641	2067	1592	1735	1495	1580	1269
Trax	-0.422973	6.14944	0.00014044	0.00165459	1360	1210	1370	1006	1119	945
CG5880	-0.573713	3.3144	0.000140764	0.00165699	216	192	166	131	146	124
CG17904	-0.386276	5.57661	0.000140972	0.00165802	984	787	861	751	758	590
CG8177	0.435309	5.57871	0.000141876	0.0016658	814	622	550	1028	899	850
His3:CG31613	-1.3729	3.48193	0.000141827	0.0016658	311	281	191	51	91	163
Slc45-1	-1.41434	0.225846	0.000142854	0.00167586	23	23	29	8	7	14
CG3457	1.53287	-0.0390985	0.000143042	0.00167663	8	9	4	27	20	17
Cpr76Ba	-5.37991	-1.88241	0.000144063	0.00168716	7	5	3	0	0	0
Myo95E	0.389913	6.18158	0.000145303	0.00170023	1197	893	978	1427	1391	1339
CG17912	0.335031	7.64259	0.000145555	0.00170029	3260	2623	2734	3958	3901	3436
CG2065	-1.45436	0.320185	0.000145437	0.00170029	25	34	22	13	14	4
CG8386	-0.451435	4.97769	0.000146007	0.00170412	706	532	538	511	444	392
TwdlL	2.60521	-1.21281	0.000146917	0.00171328	4	0	0	8	10	9
mthl1	0.457808	5.23721	0.000147227	0.00171545	627	501	422	784	731	688
CG7630	-0.392176	7.10574	0.000149465	0.00173857	2894	2461	2262	1987	2260	1796
CG7841	-0.55202	3.48044	0.00014941	0.00173857	248	175	220	169	153	133
CG3638	0.447109	6.54039	0.000149821	0.00174124	1668	1111	1096	2007	1714	1707
Fancl	-0.556978	3.38232	0.000150128	0.00174333	215	198	185	139	148	136
CG1927	0.340263	7.36809	0.000152109	0.00176484	2617	2185	2294	3232	3413	2725
Thd1	0.378333	7.81792	0.000152733	0.0017706	3849	2971	2783	4649	4145	4103
RpL10Ab	-0.343556	11.4895	0.000154336	0.00178767	58290	48705	49685	44044	46558	38078
Cpr64Ac	-2.71413	-1.20765	0.000156334	0.00180929	6	13	8	1	1	2
CG12943	1.82973	-0.427644	0.000157448	0.00182065	3	3	7	19	13	17
CG6954	0.334307	7.36899	0.000157881	0.00182412	2670	2114	2344	3312	3202	2828
fs(1)Yb	-1.79547	-0.278263	0.000158293	0.00182582	17	10	27	5	8	3
kirre	0.662819	2.69723	0.000158207	0.00182582	102	73	66	139	125	130
Ntf-2	-0.419166	7.92082	0.000159934	0.0018432	4930	4676	3857	3524	4003	3013
jvl	0.407306	6.06678	0.000161335	0.00185779	1145	794	883	1353	1268	1238
Mpc1	0.531601	4.34638	0.000163579	0.00188205	270	284	246	448	424	342
tko	-0.397143	5.49418	0.000163996	0.00188527	945	798	750	704	700	568
Xrp1	-0.347112	8.86607	0.000165214	0.00189768	10313	7383	7923	7435	7031	6351
l(1)G0320	0.399571	8.33866	0.000166219	0.00190763	5512	3847	4333	7336	6145	5242
disco-r	0.956398	2.31632	0.000166696	0.00191151	68	50	43	153	100	73
GstS1	-0.334516	8.97175	0.000166835	0.00191151	10331	8219	8773	8066	7759	6708
CG14275	-0.725269	2.96077	0.000167246	0.00191225	185	151	132	76	120	97
Pdcd4	0.444657	8.43755	0.000167316	0.00191225	6336	4042	4116	7532	6254	6426
Samuel	0.410407	6.16828	0.000167217	0.00191225	1198	812	1012	1490	1482	1192
alpha-Man-II	0.400501	7.36431	0.000168714	0.00192661	2880	2133	1953	3626	3091	2793
l(2)k05819	0.362676	7.28781	0.000169198	0.00193055	2632	2012	2040	3188	3121	2611
CG33203	-1.76263	-0.636761	0.000169992	0.00193799	15	12	13	4	6	2
CG17486	-0.439942	6.42335	0.000170982	0.00194767	1646	1475	1666	1137	1324	1216
CG3308	0.380951	6.14222	0.000171994	0.00195757	1152	857	985	1398	1401	1243
CG14966	-0.602396	4.17708	0.000175211	0.00199089	332	374	341	235	287	205
mub	0.411474	7.41564	0.0001751	0.00199089	2952	2051	2189	3932	3117	2845
CG31673	-0.526265	5.13311	0.000179875	0.00204219	694	706	601	427	549	475
alpha-Est4	1.1028	0.881946	0.000180533	0.00204797	21	14	18	38	52	29
CG42788	0.495633	3.93901	0.00018133	0.00205533	237	191	188	332	287	282
Socs36E	-0.390466	6.30119	0.000183266	0.00207555	1698	1349	1319	1126	1200	1121
Ice	-0.359025	6.99238	0.000184518	0.00208774	2743	2083	2169	2016	1989	1656
Pax	-0.422478	6.67546	0.000184646	0.00208774	2357	1657	1729	1742	1479	1220
Spn100A	2.42956	5.87076	0.000185072	0.00209085	421	107	383	4048	834	260
janB	-0.685072	3.66048	0.000186424	0.00210439	233	239	276	141	173	172
CG42817	1.48334	0.0855984	0.000186716	0.00210542	14	4	6	31	23	16
CG43462	-1.04992	1.70019	0.000186822	0.00210542	73	55	79	40	21	42
CG13436	0.53429	3.42299	0.000191683	0.00215727	165	120	138	229	231	177
RpS23	-0.339935	11.1436	0.000191737	0.00215727	48602	37292	37769	35481	36345	29611
shrb	-0.333432	7.42683	0.000193352	0.00217367	3511	2774	3070	2585	2807	2328
CG17036	-0.955006	1.91537	0.000195228	0.00219296	117	57	65	54	37	35
CG6126	-0.831718	1.95157	0.000196335	0.0022036	91	86	58	47	46	44
RpLP1	-0.347438	11.1061	0.000196598	0.00220398	44090	36785	39298	32193	35229	30826
vps2	-0.3788	6.32402	0.00019669	0.00220398	1617	1375	1412	1283	1230	1021
enok	0.394727	7.14429	0.000198914	0.00222709	2464	1739	1793	3094	2671	2386
CG12896	0.806193	2.67473	0.00019917	0.00222815	97	59	67	162	156	88
Arpc3B	-2.09995	-0.880655	0.000199867	0.00223412	10	11	13	3	4	1
CG13397	-0.65257	2.6149	0.000201718	0.00225298	123	108	127	81	79	77
snz	0.484091	4.50545	0.000203966	0.00227624	375	261	287	449	423	457
CG4951	-0.377783	6.86827	0.000204564	0.00228106	2368	1903	2158	1665	1931	1555
CG42494	1.34474	0.925226	0.00020625	0.002298	13	24	11	31	58	40
CG14434	-0.447473	6.16972	0.000206447	0.00229833	1650	1317	1095	994	1168	925
CG2016	0.756763	3.94352	0.00020664	0.00229862	224	131	201	428	321	229
tou	0.389013	8.67359	0.000207626	0.00230772	7104	5026	5226	9107	7558	6841
CG43341	-0.542352	3.25048	0.000208345	0.00231384	218	167	161	135	142	112
CG1598	-0.397672	6.27216	0.000211739	0.00234964	1669	1200	1426	1121	1284	980
CG17273	-0.354072	7.25005	0.000214319	0.00237635	3290	2423	2644	2278	2401	2089
CG7173	-0.604132	4.85279	0.000216144	0.00239465	754	513	445	483	370	310
RpL38	-0.435584	9.88416	0.000220117	0.00243671	18258	18524	15794	12601	14686	13318
bnb	0.47587	8.99421	0.000221008	0.0024446	7910	6022	6900	8273	10785	10786
CG42388	0.597664	4.10502	0.000221458	0.00244761	271	197	198	296	357	382
l(3)L1231	0.602204	6.12364	0.000224522	0.00247948	1272	717	753	1809	1213	1236
CG1887	2.35335	-1.14672	0.000225832	0.00249195	3	0	2	10	9	9
CG6847	0.459305	4.18696	0.000227169	0.00250469	304	219	223	370	353	337
CG34002	-1.57159	-0.20704	0.000229211	0.00252517	17	19	19	5	5	9
l(3)neo43	-0.521757	3.62369	0.000231771	0.00255134	253	203	246	166	178	164
CG10011	0.406481	6.45353	0.000232421	0.00255645	1519	1088	1087	1926	1645	1492
CG8436	-0.423632	6.38525	0.0002327	0.00255747	1615	1469	1557	1113	1391	1112
Irbp	-0.428859	4.6868	0.0002341	0.0025708	569	436	435	353	409	346
CG32645	1.11541	0.905132	0.0002345	0.00257108	26	10	18	33	51	37
MAGE	-0.487165	4.06875	0.000234493	0.00257108	345	294	309	222	275	208
CHORD	-0.382611	6.01169	0.000239103	0.00261947	1274	1153	1116	928	1045	863
CG42507	0.339651	8.32556	0.000239813	0.00262516	5534	3974	4368	6496	6076	5582
CG30343	-0.4607	5.27443	0.000240923	0.00263102	716	653	797	566	567	513
CG9170	-0.38084	5.97231	0.000240577	0.00263102	1310	1099	1049	971	1025	774
Ir93a	1.98464	-0.753699	0.000240749	0.00263102	2	2	5	14	8	16
eIF-2beta	-0.343292	8.51475	0.000242002	0.0026407	7823	5825	6365	5928	5876	4596
CG42497	-0.407324	6.1912	0.000243372	0.00265355	1465	1347	1231	1045	1205	936
Msr-110	0.353069	9.06594	0.000244727	0.00266621	9032	6329	7692	10890	10200	9367
FK506-bp2	-0.333282	9.27505	0.000245196	0.0026692	12416	10197	11033	9588	10088	8166
YT521-B	0.334798	8.35942	0.000250097	0.0027204	5164	4219	4757	6380	6503	5681
NetA	0.964892	4.56146	0.000251599	0.00273457	339	154	292	773	508	311
CDase	0.390466	5.2745	0.000251803	0.00273463	625	502	503	804	778	641
CG6583	0.391453	6.48178	0.000252433	0.00273931	1361	1185	1209	1608	1907	1614
CREG	0.549554	4.2728	0.000256005	0.00277588	325	233	207	458	394	309
CG6028	-0.382725	5.66951	0.000257377	0.00278856	1054	864	886	852	771	620
bmm	-1.1085	0.839948	0.00025789	0.00279192	42	38	32	28	14	12
n-syb	-2.29869	-1.05195	0.000259007	0.0028018	13	8	9	0	3	3
Cyp6a13	-1.82024	-0.704985	0.000259289	0.00280265	11	11	16	4	6	1
CG8303	-0.49688	3.86029	0.000259734	0.00280425	323	256	246	231	210	167
Tim10	-0.405776	6.18797	0.000259845	0.00280425	1461	1345	1226	1045	1203	933
CG31810	1.12633	0.619148	0.000261218	0.00281477	16	16	11	30	37	31
Cyp12a4	1.58979	-0.262552	0.00026123	0.00281477	5	6	6	21	16	17
Asx	0.371107	6.54619	0.000263704	0.0028278	1575	1234	1172	1886	1775	1669
CG11360	0.368282	8.08702	0.000263879	0.0028278	4266	3565	3725	4996	5184	5270
CG12828	1.17658	4.32881	0.000263389	0.0028278	211	134	250	774	426	225
CG13362	-0.484433	4.74425	0.00026358	0.0028278	528	438	548	374	413	342
CG31538	1.10461	1.35741	0.000263682	0.0028278	29	23	23	84	47	38
ligatin	-0.355649	5.67848	0.000262885	0.0028278	1097	843	866	773	827	676
rno	0.386293	6.88641	0.000262855	0.0028278	2030	1479	1514	2567	2177	2046
CG4447	-0.522522	3.32039	0.000266064	0.002849	218	179	172	145	150	117
CG3655	0.386194	6.95466	0.00026697	0.00285648	2216	1511	1556	2615	2412	2100
Tsp5D	1.27287	0.242009	0.000267433	0.0028592	12	7	11	26	32	18
Anxb11	-0.407889	6.80675	0.00026844	0.00286774	2634	1842	1796	1861	1638	1388
RhoGEF2	0.364028	8.23596	0.000269108	0.00287042	5194	3910	3809	6315	5479	5377
vfl	0.345376	7.79618	0.000268998	0.00287042	3811	2901	2868	4237	4257	4076
Cpr78E	1.61634	2.76005	0.00026984	0.00287599	70	23	67	294	150	69
CG31075	0.402541	7.64866	0.00027141	0.00289048	3360	2265	2847	4529	3902	3191
CG11289	-1.63023	-0.387418	0.000275233	0.00292666	14	14	20	8	6	2
CG6180	-0.351023	7.79581	0.000275028	0.00292666	4464	3731	3931	3519	3689	2732
CG10339	-2.31157	-1.0517	0.000276853	0.00294162	11	11	8	2	4	0
Nuf2	-0.45392	5.56266	0.000277335	0.00294446	921	836	889	591	794	632
CG6488	-0.516525	4.3224	0.000279888	0.00296928	416	304	423	301	302	230
CG2076	-0.391465	6.37618	0.000281836	0.00298764	1908	1340	1376	1220	1377	1051
CG1140	-0.387235	6.14341	0.000286351	0.00303232	1511	1250	1145	1135	1056	914
CG13897	-0.433479	5.19717	0.000286492	0.00303232	808	587	663	601	568	417
CG30195	-1.07206	0.966737	0.000287187	0.00303734	46	46	30	16	21	23
simj	0.359113	7.30696	0.000289663	0.00306117	2637	1931	2215	3283	3005	2728
Hop	-0.329082	8.80383	0.000293356	0.00309781	9027	7309	7918	7158	7217	5759
cenG1A	0.444563	4.83396	0.000295889	0.00312216	481	321	378	597	581	484
Alh	0.404576	6.69557	0.000297175	0.00313123	1768	1220	1384	2324	1880	1779
CG8311	0.353993	6.0039	0.000297204	0.00313123	1038	820	886	1306	1229	1108
pps	0.335356	7.53901	0.000297542	0.00313239	3091	2422	2516	3907	3477	3136
CG43783	0.378297	5.64387	0.000298844	0.0031437	821	623	676	1083	928	849
Idgf4	-0.401887	7.81456	0.000299659	0.00314745	5333	3465	3819	3843	3313	2712
Mhcl	0.399163	6.40891	0.000299485	0.00314745	1464	1009	1119	1790	1535	1557
Tom7	-0.420509	6.80625	0.000300657	0.00315552	2097	2099	1996	1667	1860	1342
wac	-0.376116	5.952	0.000304997	0.00319863	1235	1103	1057	898	1010	821
Sk1	-0.830139	1.65711	0.000306797	0.00321506	70	68	52	39	36	36
CoVa	-0.356113	7.08877	0.000307961	0.00322234	2867	2283	2309	2117	2234	1717
Prosbeta7	-0.339934	7.91675	0.000307844	0.00322234	5360	3748	4136	3892	3828	3116
CG1832	0.322372	7.7536	0.000308506	0.00322313	3659	2750	2968	4129	4217	3793
Ncoa6	0.378436	6.82777	0.000308309	0.00322313	1935	1470	1427	2427	2093	1981
CG34054	2.24255	-1.02283	0.000309764	0.00323383	1	2	3	7	14	10
bor	-0.353599	6.45196	0.000310509	0.00323914	1844	1459	1489	1317	1405	1173
Pi3K68D	0.36717	6.92031	0.000311008	0.00324189	2025	1488	1659	2467	2223	2205
e(y)3	0.573151	6.94763	0.000312005	0.00324736	2347	1279	1305	3070	2227	2187
NetB	0.44729	5.39041	0.000311816	0.00324736	721	510	506	961	758	728
Arf72A	-0.379611	5.99379	0.000313238	0.00325289	1341	1064	1108	1063	986	766
CG17843	0.652693	5.69601	0.000312799	0.00325289	640	716	584	786	1182	1207
CG3192	-0.359549	5.76729	0.000313247	0.00325289	1213	877	906	845	879	696
CG40472	-0.372935	7.67464	0.000315174	0.00327043	3797	3747	3608	3099	3304	2637
Hrb27C	0.494521	8.85725	0.000316737	0.00328417	8726	5284	5067	10767	8319	8392
Sox102F	0.50447	5.22661	0.000317661	0.00329127	616	391	508	912	727	590
drpr	0.357763	7.02122	0.0003194	0.00330431	2093	1615	1845	2668	2436	2281
Mdh1	-0.346627	6.60686	0.000319392	0.00330431	1993	1595	1729	1531	1547	1275
CG43444	0.350308	9.16962	0.000320446	0.00331264	9809	7189	7795	11760	10420	10456
ppk28	-0.60354	2.73957	0.000322851	0.003335	146	116	125	85	106	74
cid	-0.558353	3.20216	0.000325532	0.00336016	199	154	176	114	131	127
CG1236	-0.355652	6.27658	0.000327243	0.00337529	1602	1284	1355	1205	1224	1019
CG16865	0.461266	4.46334	0.000328119	0.00338179	310	304	281	423	474	391
CG10803	0.45554	5.92017	0.000330602	0.00340483	1077	767	663	1328	1104	1106
clos	-0.371293	7.24273	0.000332032	0.003417	3175	2659	2493	2129	2390	2157
foxo	0.379165	5.59885	0.000333654	0.00343112	811	629	615	994	888	883
CG11122	0.424258	6.00061	0.00033444	0.00343583	1171	741	779	1407	1219	1091
CG5391	-0.706408	2.07562	0.000334612	0.00343583	99	78	72	51	56	51
CG7265	-0.378705	6.13128	0.000335234	0.00343965	1422	1235	1195	1013	1148	927
dgt3	-0.377933	5.85844	0.000337292	0.00345818	1173	1005	1009	798	989	769
CG9306	-0.36589	6.18898	0.000338647	0.00346949	1502	1267	1230	1133	1163	938
uzip	-0.375988	6.51863	0.000339833	0.00347905	1962	1591	1500	1322	1382	1325
pit	-0.313744	7.37853	0.000345156	0.00353092	3460	2708	2836	2591	2718	2220
CG6171	-0.400315	5.5178	0.000346291	0.00353989	948	756	833	611	762	624
Dscam4	-2.58792	-1.27908	0.000349677	0.00357184	10	9	6	3	0	1
CG15916	-0.476113	3.7929	0.000350948	0.00358217	295	240	246	189	223	172
CG32628	1.77217	-0.660232	0.000354351	0.0036134	3	4	4	12	15	13
CG33158	-0.35528	6.31751	0.000354534	0.0036134	1674	1276	1419	1207	1282	1058
CG10280	3.12043	-1.51007	0.0003571	0.00363687	2	0	0	8	9	4
CG31029	1.3307	0.290967	0.000357372	0.00363694	8	11	11	28	36	16
Flo-1	-0.425297	6.52244	0.000358671	0.00364746	1946	1515	1678	1157	1422	1374
blp	-0.463733	4.36313	0.000359015	0.00364826	428	356	373	277	350	248
l(3)psg2	0.380108	6.75207	0.00036053	0.00366095	1862	1335	1392	2346	1983	1847
CoIV	-0.340357	7.29689	0.000361552	0.00366862	3353	2550	2686	2394	2554	2092
cn	5.35561	-1.88153	0.000362366	0.00367417	0	0	0	4	2	9
l(1)G0334	-0.375847	6.84651	0.00036266	0.00367444	2624	1864	1889	1864	1816	1413
CG5384	-0.318785	7.83433	0.000364444	0.0036898	4587	3745	4010	3642	3671	3000
CG8086	-1.25613	1.09076	0.000364781	0.00369049	56	55	28	23	29	9
CG18317	0.402948	4.59942	0.000365653	0.00369418	377	318	317	485	494	414
CG33506	-0.369059	5.37893	0.000365949	0.00369418	862	715	705	656	643	540
ksr	0.372376	5.75553	0.00036622	0.00369418	880	633	784	1140	1041	906
Psa	-0.353918	6.94156	0.000366078	0.00369418	2706	1989	2058	1977	1823	1666
IP3K2	0.428261	5.33516	0.00036666	0.0036959	679	434	571	859	825	663
CG11700	-0.437142	5.55394	0.000368004	0.0037013	1035	811	791	817	685	528
CG12493	3.11139	-1.50922	0.000367481	0.0037013	0	0	2	8	9	4
CG4911	0.550669	4.05453	0.00036792	0.0037013	290	199	169	377	325	292
Hel25E	-0.316505	9.37243	0.000370815	0.00372685	13873	10794	11257	10099	10790	9053
RFeSP	-0.412325	6.04717	0.00037301	0.00374618	1562	1014	1135	975	1098	809
Mcm5	-0.357941	7.56745	0.000373458	0.00374794	3902	3078	3411	2580	3073	2749
CG31950	-0.557239	3.28806	0.000374069	0.00375133	226	145	193	128	143	125
noe	0.91902	1.83843	0.000377043	0.0037784	44	46	26	90	62	76
Der-1	-0.365346	6.17374	0.000378526	0.00379049	1523	1175	1268	1089	1199	915
CG5355	-0.32164	8.70522	0.000382316	0.00382567	8276	6801	7500	6400	6650	5755
sun	-0.363934	7.09656	0.000383587	0.0038356	2962	2338	2227	2007	2288	1780
CG31140	1.65734	1.00627	0.000384385	0.00384077	22	17	5	82	34	29
CG12964	0.426982	5.57338	0.000385141	0.00384274	795	568	622	1107	938	730
Src64B	0.53017	4.78731	0.00038513	0.00384274	470	329	306	670	516	464
CG34430	0.989892	1.31442	0.000386827	0.00385403	31	25	21	72	40	47
Pgd	-0.371437	6.13823	0.000386832	0.00385403	1551	1094	1244	1117	1109	891
Cpr66Cb	5.95104	-1.47036	0.000394577	0.00392797	0	0	0	18	6	0
Trim9	0.510567	4.38689	0.000394825	0.00392797	349	206	288	448	393	395
Ir62a	0.721559	2.69752	0.000395256	0.00392941	92	86	56	147	120	133
CG14221	-1.16832	0.523064	0.000396301	0.00393696	40	25	25	9	15	17
l(3)01239	-0.398041	7.27404	0.000400969	0.00398045	3238	2882	2446	2561	2290	1933
CG10638	-0.330179	7.49566	0.000401681	0.00398176	3478	3056	3228	2809	2942	2367
mRpS33	-0.430675	4.6564	0.00040156	0.00398176	503	454	445	350	415	321
CG33156	0.371327	5.2271	0.000403601	0.00399792	616	465	510	749	748	639
CG4169	-0.390895	6.44241	0.000404098	0.00399996	2071	1373	1410	1352	1362	1105
CG6241	0.354522	5.801	0.000406382	0.00401967	909	731	743	1009	1170	984
tyf	0.60075	6.65823	0.000407653	0.00402935	1893	1154	933	2574	1873	1732
Aats-ser	0.364619	5.36303	0.000409585	0.00404553	677	537	538	817	808	716
Kr-h1	0.372233	7.06182	0.000410094	0.00404766	2291	1511	1909	2598	2703	2334
Pp2C1	0.380471	6.02516	0.000412868	0.00407211	1087	821	855	1347	1183	1189
ssp	-0.399353	5.90122	0.000414377	0.00408406	1151	1081	1060	812	939	851
Arpc4	-0.365764	6.29029	0.000416241	0.00409949	1696	1327	1282	1158	1285	1025
UGP	-0.353316	7.00686	0.000420739	0.00414083	2547	2138	2331	2093	2007	1636
mRpS18C	-0.457498	4.15145	0.000422797	0.00415811	348	302	344	254	282	220
Rcd6	-0.488043	4.13626	0.00042445	0.00417138	436	274	295	248	258	231
CG5290	-0.35459	5.82563	0.000425213	0.0041759	1123	929	1041	815	915	787
FBX011	0.454189	6.50936	0.000425941	0.00418006	1631	1109	1041	2138	1686	1520
CG10462	0.428856	6.37473	0.000427794	0.00419525	1173	1032	1221	1469	1727	1606
CG17331	-0.337839	7.71364	0.000430164	0.00421548	4296	3627	3495	3286	3512	2634
Esyt2	-0.962997	5.29106	0.000431729	0.00422781	908	918	681	222	537	565
Fur2	0.348839	7.91943	0.000432525	0.00423259	4378	3014	3075	4922	4563	4248
CG11563	-0.356945	5.99722	0.000434582	0.0042497	1259	1125	1098	952	1024	860
btv	0.606267	3.59189	0.00043531	0.00425378	155	168	135	259	221	247
CG14662	1.85812	-0.413658	0.000436653	0.00426388	8	2	3	18	25	7
Vha100-2	0.34877	6.95152	0.000437921	0.00427323	2072	1580	1667	2610	2374	2050
cype	-0.370161	6.71479	0.000438817	0.00427894	2394	1648	1771	1583	1754	1319
DmsR-1	3.60337	-1.73139	0.000442894	0.00431563	0	1	0	9	5	3
CG7065	0.35113	6.01227	0.000445292	0.00433592	1037	825	900	1339	1283	1048
aay	1.50893	0.112661	0.000447578	0.00435509	11	6	7	38	22	12
Ets96B	-1.03622	1.58838	0.000448951	0.00436537	54	66	69	21	34	41
CG7518	0.398172	7.62036	0.000449721	0.00436977	3633	2327	2411	4341	3635	3369
Pros26	-0.31552	7.72733	0.000450344	0.00437273	4547	3358	3597	3391	3379	2814
CG16721	0.388121	6.07899	0.000453983	0.00439874	1173	792	905	1454	1320	1113
CG42321	0.450462	5.35194	0.000453567	0.00439874	715	499	477	899	719	760
icln	-0.354102	6.53215	0.000453674	0.00439874	1867	1564	1622	1452	1517	1159
CG15766	0.851879	2.05137	0.000455166	0.00440709	39	54	45	73	106	83
Mtor	0.367465	8.73723	0.000457665	0.00442817	7570	5310	5426	9327	7756	7296
rictor	0.381616	6.39604	0.000458382	0.004432	1497	995	1099	1796	1638	1399
Eaf6	-0.416565	4.60915	0.000460655	0.00445084	498	406	450	339	370	344
Gr64b	2.15615	-1.08295	0.000466766	0.00450355	2	0	4	8	10	11
Gr64c	2.15615	-1.08295	0.000466739	0.00450355	2	0	4	8	10	11
CG5375	-1.08074	1.31007	0.000467585	0.0045083	45	66	45	24	21	32
l(1)G0469	0.579958	3.11951	0.000473206	0.0045593	118	99	117	177	162	179
al	0.42976	5.97363	0.000474856	0.00456878	1000	655	961	1287	1321	1050
CG15523	0.358368	6.13742	0.000474594	0.00456878	1197	913	904	1425	1355	1222
spri	0.441093	5.6807	0.000479656	0.00461174	896	620	617	1218	968	813
CG6434	-0.467939	3.78609	0.000486823	0.00467738	292	245	238	214	187	181
mRpL52	-0.436489	4.992	0.000487255	0.00467826	661	597	518	470	517	384
CG9154	-0.384311	5.29407	0.000491675	0.00471741	761	700	691	594	619	510
CG7766	0.344511	6.96944	0.000492387	0.00472094	2158	1612	1633	2569	2389	2145
Sps2	-0.546899	5.47538	0.000498424	0.00477549	818	885	840	488	693	639
CG1607	-0.334163	8.85305	0.000500076	0.00478465	9875	7982	7343	7534	6978	6234
Mipp1	0.945792	1.33211	0.000499981	0.00478465	21	27	31	50	50	59
CG13807	-0.424112	4.00701	0.000504626	0.00482444	343	269	282	236	249	207
Hsc70-5	-0.31912	8.38753	0.000504937	0.00482444	6955	5719	5465	5388	5238	4493
Ir56b	5.62609	-1.68556	0.000505711	0.00482849	0	0	0	12	7	0
CG11247	0.374381	5.42812	0.000507669	0.00484046	659	548	613	857	904	702
mRpL41	-0.432695	4.72163	0.000507632	0.00484046	525	491	451	384	421	331
CG17278	-0.31581	9.483	0.000512923	0.00488716	14873	11661	12226	10576	11683	10040
ubl	-0.444232	5.28993	0.000514993	0.00490349	695	743	733	575	587	514
CG1638	0.993542	1.21404	0.00051621	0.00491168	22	22	27	37	65	46
pcx	0.40123	6.09259	0.000517558	0.00492109	1195	816	873	1514	1259	1161
CG42399	0.44263	3.94541	0.000519541	0.00493313	248	189	196	328	311	255
kek5	0.613874	6.27807	0.000519448	0.00493313	1507	812	734	1948	1399	1405
RpL23A	-0.340985	10.8627	0.000520418	0.00493804	41083	28150	32901	27561	31065	24782
awd	-0.363692	10.1765	0.000521034	0.00494048	26704	18421	18915	18606	18944	14010
ChLD3	-0.385063	5.23864	0.000521628	0.00494184	726	656	689	562	592	502
RpL22	-0.324992	10.943	0.000521896	0.00494184	38192	33078	35146	30058	32203	26449
CG42674	-0.342829	7.26041	0.000523071	0.00494956	3031	2491	2819	2313	2365	2161
CG10262	0.948445	1.0761	0.000524933	0.00496375	27	20	19	35	50	47
Inx7	0.797947	1.48707	0.000528862	0.00499747	33	32	30	60	56	56
eIF-4B	-0.327729	8.4182	0.000529932	0.00500415	6531	5731	6224	5393	5429	4572
CG33232	-0.363016	6.60652	0.000531552	0.005016	2103	1533	1726	1650	1453	1226
His2B:CG33872	-0.571072	2.78594	0.000533814	0.00503388	146	114	136	104	90	83
Tsp42Ej	-0.814337	1.84847	0.000544235	0.00512864	96	50	73	52	37	39
CG34229	-0.669908	3.12575	0.000545104	0.00513331	166	177	170	91	131	115
Arf84F	-0.411387	5.27375	0.000546614	0.00514049	752	641	748	602	626	458
RpL40	-0.330336	10.7401	0.000546293	0.00514049	33834	29697	29124	25659	28626	22671
CG11885	-0.416031	4.57039	0.000547225	0.00514272	498	416	405	362	386	283
Roe1	-0.343822	5.68259	0.000550847	0.00517322	1025	867	900	765	848	680
CG14482	-0.513751	5.24444	0.00055319	0.00518788	646	773	719	513	608	462
ro	2.29657	-1.1781	0.000553317	0.00518788	1	0	4	12	6	9
sns	0.497202	4.61175	0.00055354	0.00518788	417	299	274	581	481	387
Np	0.637963	6.0193	0.000558371	0.0052296	1103	611	790	1879	1207	943
wge	0.386591	6.9541	0.000561688	0.00525708	2232	1433	1622	2643	2278	2190
IA-2	3.63313	-1.73006	0.000562263	0.00525888	1	0	0	5	3	9
CG2211	0.413319	4.74634	0.00056426	0.00526994	406	351	358	545	535	467
CG8547	-0.375847	7.44571	0.000564596	0.00526994	3667	2916	3025	2247	2805	2603
Cul-2	-0.313995	7.4889	0.000564506	0.00526994	3565	2955	3171	2749	2764	2586
CG3419	0.485343	4.3607	0.000565966	0.00527557	338	207	290	385	431	389
Muc91C	3.04639	-1.17989	0.000565768	0.00527557	1	2	0	20	5	4
Trip1	-0.310264	8.94215	0.000572949	0.00533705	10187	8170	8226	8009	7817	6480
CG31051	-0.974031	1.44039	0.000576685	0.0053682	46	58	63	36	36	18
CG11523	0.388383	5.07468	0.000577781	0.00537477	521	445	450	678	704	552
CG4300	-0.394887	4.70232	0.000581604	0.00540668	522	423	490	379	412	345
Srp14	-0.403557	5.23804	0.000585199	0.00543642	757	634	696	591	622	438
CG9921	-0.414879	4.68576	0.000592368	0.0054993	500	476	446	371	403	340
rho-7	0.347822	6.12488	0.000601121	0.00557679	1198	870	935	1366	1372	1216
RpS27A	-0.317364	11.5447	0.000606243	0.00562053	59095	50751	51434	45458	49210	40332
Glut1	0.615332	5.43759	0.000609479	0.00564672	698	422	559	1238	776	654
CG4836	1.41875	-0.112651	0.000610069	0.00564838	5	6	10	18	19	22
CG13822	-3.61382	-1.77983	0.000617867	0.00571672	8	4	4	0	1	0
CG13847	1.51797	-0.391391	0.00062019	0.00573436	9	3	4	15	17	16
DLP	0.346491	7.04962	0.000621714	0.00574459	2218	1817	1657	2660	2545	2304
ome	0.437031	6.0271	0.000626902	0.00578863	1128	814	773	1539	1185	1080
CG10268	-0.436262	4.10045	0.000632019	0.00583197	344	304	306	236	267	231
Rpn12	-0.344473	7.07802	0.000632483	0.00583233	2943	2139	2319	2166	2197	1690
pyd	0.368031	9.07434	0.000633493	0.00583773	9701	6448	7010	11900	9949	8989
mav	0.336986	7.66886	0.000635776	0.00585484	3073	2644	3013	3759	4090	3642
Tom70	0.33045	6.71326	0.000636922	0.00586148	1766	1349	1425	2005	2175	1748
CG15019	-0.36139	7.00056	0.000637866	0.00586623	2446	2359	2170	1952	1991	1735
CG42669	0.347154	6.52368	0.000647512	0.00595097	1607	1138	1222	1757	1778	1670
Cctgamma	-0.328777	8.77862	0.000650722	0.00597647	9997	6851	7190	7025	6953	5790
CG3436	-0.342423	6.61104	0.000657301	0.00602894	1893	1678	1734	1504	1588	1281
CG9527	0.377579	5.39645	0.000657312	0.00602894	691	532	562	888	757	757
CG31775	-1.62371	0.410244	0.000658403	0.00603492	36	39	15	3	15	12
CG32250	-0.379126	4.62756	0.000659964	0.0060452	526	406	428	385	371	329
Smg5	0.375026	7.40008	0.000665202	0.00608913	2967	2027	2226	3771	2943	2944
Prx5	-0.318122	7.68954	0.00066656	0.0060975	4231	3435	3506	3351	3397	2599
CG2278	0.615706	2.51112	0.000669433	0.0061197	84	57	74	108	132	102
CG11835	1.19603	4.03194	0.000672812	0.00614651	193	111	178	683	303	176
l(2)37Ce	-0.348302	5.47669	0.000674044	0.00615292	896	759	769	699	709	577
SpdS	-0.361751	6.39052	0.000674409	0.00615292	1740	1490	1364	1227	1398	1099
beta3GalTII	-0.426004	4.04871	0.000679848	0.00619843	349	283	288	244	235	231
CG5903	-0.323474	6.77521	0.00068234	0.00621703	2280	1825	1835	1679	1772	1481
Phk-3	0.334834	7.62297	0.000686812	0.00625363	3170	2641	2680	3733	4325	3126
Trxr-1	-0.336758	8.73938	0.000691344	0.00629073	9771	6690	6992	6967	6798	5439
l(1)dd4	-0.337716	6.50364	0.000692531	0.00629736	1816	1506	1607	1348	1417	1288
CG8549	-0.371502	5.45076	0.000695337	0.0063187	863	791	738	636	696	596
CG3321	-0.327646	7.14038	0.000698726	0.0063453	2926	2317	2419	2122	2369	1860
Liprin-alpha	0.392405	5.96713	0.000703694	0.0063862	1110	814	727	1338	1168	1087
CG11739	0.410597	5.48128	0.000708917	0.00642935	789	552	538	978	924	688
CG2135	0.391025	6.19731	0.000711674	0.00644161	1108	855	1124	1536	1410	1269
CG32581	0.354117	7.06099	0.000711319	0.00644161	2152	1861	1693	2707	2775	2133
px	0.340752	6.2734	0.000711071	0.00644161	1297	969	1067	1526	1473	1371
CG1399	0.368012	7.48585	0.000713407	0.00645304	3165	2196	2322	4058	3288	2913
CG5873	0.582414	5.16096	0.000716055	0.00647274	555	403	439	985	716	487
Uba3	-0.334473	5.98363	0.000717492	0.00648147	1297	1062	1078	953	1046	838
Taf4	0.319374	8.0005	0.000718372	0.00648516	4431	3082	3652	4974	4891	4523
CG7131	0.825938	1.23058	0.000720307	0.00649836	30	23	25	53	50	41
CG3040	-0.458361	4.10937	0.000724462	0.00653156	348	289	330	270	273	193
CG6734	0.399813	4.92297	0.00072809	0.00655996	528	372	378	617	592	533
CG33226	1.48048	-0.128817	0.000729768	0.00657078	4	7	9	13	26	20
CG11374	1.1496	0.472456	0.00073201	0.00658665	11	10	17	23	32	33
Grip163	0.354524	5.44712	0.000734235	0.00659804	741	522	607	838	864	771
l(2)37Cg	-0.448555	4.28407	0.000734223	0.00659804	371	353	361	264	312	255
CG5703	-0.355049	6.2028	0.000734725	0.00659813	1617	1170	1259	1092	1238	950
cdc14	0.414958	5.13505	0.000737563	0.00661352	580	442	446	798	642	591
CG11077	-0.480034	4.2149	0.00073742	0.00661352	369	319	358	268	314	204
cno	0.400652	7.24744	0.000737882	0.00661352	2743	1842	1859	3369	2701	2683
CG9643	-0.397459	4.89491	0.000738437	0.00661418	631	504	511	451	484	366
Nmt	-0.31131	7.54539	0.000741473	0.00663706	3879	3167	3048	3031	3008	2430
ovo	0.307817	7.6775	0.000744595	0.00666066	3555	2630	2770	4064	3835	3565
CG42239	-0.381873	5.69184	0.000746537	0.00667369	968	965	894	768	849	659
CG6800	0.974242	1.3746	0.000748392	0.00668593	35	31	15	50	73	43
CG4793	5.76348	-1.59553	0.000750378	0.00669932	0	0	0	16	5	0
CG3011	-0.328668	7.53748	0.000753069	0.00671462	4197	2854	3110	2715	3016	2608
inv	0.354316	6.52773	0.000752864	0.00671462	1531	1125	1300	1789	2001	1471
CG7609	0.367579	5.24928	0.000756544	0.00673275	613	478	525	705	812	650
mask	0.374582	8.89799	0.00075644	0.00673275	8451	5900	6060	10729	8446	8139
zetaCOP	-0.357566	6.72514	0.000756571	0.00673275	2042	1841	1882	1761	1642	1311
CG31248	-1.42621	-0.178938	0.00075867	0.0067427	24	15	16	13	5	3
CG5706	-0.323704	7.06244	0.00075834	0.0067427	2838	2195	2228	2146	2103	1774
alphaTub85E	2.67748	-1.42867	0.000762	0.00676536	1	0	2	12	4	6
CG5514	0.325665	6.66482	0.000762204	0.00676536	1731	1289	1382	2046	1931	1738
Rm62	0.313463	10.9308	0.000763286	0.00677059	32313	24383	28348	37113	37764	34621
Scsalpha	-0.309804	7.34291	0.000763792	0.00677071	3602	2581	2631	2557	2573	2219
CG13993	-0.367243	6.6552	0.000764555	0.00677311	1928	1825	1748	1503	1699	1270
Unc-89	1.04967	1.49653	0.000767187	0.00679205	30	34	21	86	42	56
alphaPS5	0.532849	3.57733	0.000769433	0.00680755	151	161	155	227	246	233
E5	0.508151	4.88179	0.00077191	0.00682508	531	278	389	592	656	503
CG3527	-0.382573	5.10037	0.000774531	0.00684385	729	597	564	498	552	456
RpS4	-0.304977	11.9455	0.000777504	0.00686571	82829	63809	66516	63074	64347	51894
plexB	0.315184	8.65023	0.000781771	0.00689895	6475	5335	5631	7717	7472	7322
Arpc1	-0.357724	6.80719	0.000784369	0.00691744	2614	1693	1882	1775	1764	1444
CG14757	-0.794853	1.76218	0.000784991	0.00691849	84	64	56	44	31	46
CHES-1-like	-0.384627	7.09066	0.000785548	0.00691896	2497	2401	2565	1924	2089	1959
larp	0.308632	8.12403	0.000790009	0.0069538	4720	3636	3823	5572	5134	4914
Cam	-0.30432	9.90845	0.000792956	0.00697138	19536	16201	16040	15241	14773	13544
CG16817	-0.303432	9.46201	0.00079302	0.00697138	14082	11958	11899	10892	11503	9632
CG40045	-0.349534	8.06447	0.00079415	0.00697239	4994	4684	4850	3773	4363	3778
RpL12	-0.302311	11.1563	0.000793794	0.00697239	47665	36146	39430	35919	37391	30494
Dyb	0.40675	5.15723	0.000797405	0.00699205	607	406	487	760	647	645
GlyP	-0.30775	7.9587	0.000797094	0.00699205	5009	4076	4326	3833	3785	3622
Swim	-0.596707	2.63943	0.00080602	0.00706308	141	122	97	82	88	77
RhoGAP71E	0.333818	6.86683	0.000808379	0.00707924	2065	1487	1509	2333	2239	2018
CG34376	0.382645	4.9254	0.000811414	0.0071013	494	386	403	589	589	555
Aats-cys	-0.322994	6.87848	0.000816042	0.00713725	2503	1863	2028	1908	1828	1566
CG8192	0.508508	3.84403	0.000816658	0.0071381	206	163	203	291	336	224
CG10237	-0.408817	5.12663	0.000817343	0.00713955	820	583	549	503	564	452
CG14384	5.01925	-2.05269	0.000818528	0.00714536	0	0	0	4	4	4
CG11961	0.313579	7.87002	0.000819705	0.0071511	3602	3087	3444	4473	4624	4036
del	0.399664	4.72158	0.000825169	0.00718964	407	315	382	537	525	453
Gs2	0.704128	3.78765	0.000824655	0.00718964	180	168	158	216	288	346
vav	0.407634	5.56483	0.000826068	0.00719291	862	556	581	1025	853	848
CG32017	-1.18387	0.161645	0.000830208	0.00722439	20	23	25	11	8	12
Unr	0.357661	7.74931	0.000843454	0.00733038	3944	2711	2624	4588	4005	3661
wapl	0.334664	6.46035	0.000843002	0.00733038	1520	1091	1200	1776	1679	1517
alphaTry	3.16489	-1.08612	0.000844782	0.00733728	1	2	0	20	11	1
CG2816	-1.00273	1.65355	0.000851035	0.00738692	60	62	75	20	38	44
Cip4	0.373257	6.76997	0.000855281	0.00741909	1928	1355	1382	2388	1947	1900
CG43885	-2.52171	-1.31575	0.000860158	0.00745669	12	9	3	2	1	1
E(spl)m6-BFM	0.627588	3.92403	0.000866809	0.00750962	226	179	172	404	322	208
CG33123	-0.308005	7.8173	0.000870656	0.00753819	4678	3649	3858	3808	3507	2925
CG30069	0.504082	10.7485	0.000871922	0.00754003	30171	19416	20586	44843	28115	29493
spel1	0.347292	6.70311	0.000871965	0.00754003	1669	1272	1529	1971	1985	1933
CG18281	1.58392	-0.50925	0.000873997	0.00755065	8	4	2	17	11	16
CG32816	1.62893	-0.231249	0.000874291	0.00755065	6	4	7	31	16	9
CG2982	-0.326259	6.92857	0.000876456	0.00756329	2586	2017	2018	1816	2015	1649
Myo10A	0.470529	6.9774	0.000876856	0.00756329	2227	1306	1675	2997	2130	2278
CG30185	-0.34584	5.43779	0.000878354	0.00757147	872	728	758	638	705	588
CG8854	0.943178	1.0485	0.00088102	0.00758969	28	17	20	47	34	48
Tsf3	-0.629899	3.44324	0.000883981	0.00761043	252	207	181	122	135	168
CG33267	-0.698845	1.89132	0.00088992	0.00765498	76	70	71	40	53	46
CG42676	0.443299	3.97754	0.00089027	0.00765498	220	198	225	312	317	283
Fdh	-0.30657	7.90417	0.00089178	0.00766317	5193	3689	4101	3812	3912	3154
unc-45	-0.344182	6.46223	0.000896069	0.00769522	1841	1361	1614	1453	1330	1157
CG10505	2.90881	-1.63835	0.000896841	0.00769704	2	0	0	5	7	6
RpL29	-0.321597	10.2814	0.000900597	0.00772446	24306	21699	21182	18396	20848	16890
Abl	0.440957	6.34114	0.000902664	0.00773736	1496	890	1007	1895	1514	1330
CG42514	0.48098	7.04003	0.000903552	0.00774015	1759	1694	1855	2090	2950	2685
NT5E-2	1.83571	-0.337417	0.000908072	0.00777402	7	3	4	32	12	9
Ubi-p63E	0.323574	12.052	0.000913596	0.00781645	70990	57971	55201	88554	84145	67427
CG13255	-0.984002	0.908235	0.000917481	0.00784481	50	32	33	14	30	16
CG42666	-0.737583	3.51761	0.000925678	0.00790997	355	172	179	177	143	112
CG17159	0.410198	5.9759	0.000926951	0.00791594	1122	827	701	1360	1151	1120
CG6512	-0.323188	7.09161	0.000930369	0.00794019	2967	2216	2238	2185	2117	1841
epsilonCOP	-0.336676	6.04963	0.000931597	0.00794573	1329	1089	1179	1004	1067	894
CG10343	-0.383042	5.35222	0.00093397	0.00795611	774	731	732	641	658	500
daw	1.18161	2.17878	0.000933817	0.00795611	54	29	48	169	93	50
mRpL54	-0.428971	4.93723	0.000936506	0.00797277	626	584	494	434	502	386
os	-0.51318	3.54925	0.00093992	0.00799688	259	195	213	138	179	166
Cont	0.296522	9.69722	0.000943114	0.00801909	14114	10820	11490	16323	15652	14376
CG43672	0.660083	2.45373	0.000945809	0.00803494	77	65	60	100	142	91
Inr-a	0.330623	7.62434	0.000946146	0.00803494	3572	2481	2533	4146	3770	3242
l(2)06225	-0.332297	7.23629	0.000951405	0.00807461	3236	2553	2425	2344	2501	1937
Atg9	0.362939	5.15596	0.000957143	0.0081183	598	456	466	735	673	618
CG9121	-0.372103	5.69655	0.000958272	0.00812286	969	840	1025	771	839	680
CG34261	-0.465256	4.33354	0.000960405	0.00813593	401	379	350	253	333	268
rempA	-0.542113	3.25057	0.00096226	0.00814662	187	181	174	127	123	137
tlk	0.354267	7.49307	0.000965118	0.00816579	3239	2348	2176	3903	3334	3017
CG31998	0.375304	7.59	0.000987597	0.00834571	3408	2522	2299	3972	3356	3650
Dlc90F	-0.322765	7.19187	0.000987488	0.00834571	2911	2372	2628	2251	2437	1909
128up	-0.32003	7.26045	0.000995415	0.00840515	3131	2593	2573	2429	2515	1984
FucTC	1.14135	0.47333	0.000996274	0.00840515	8	12	18	29	28	31
Hsp67Bc	1.74654	1.40515	0.000996469	0.00840515	22	27	6	80	99	20
Ptp10D	0.330723	7.80716	0.000997486	0.00840515	3705	3081	2889	4196	4155	4236
Taf2	0.321461	6.82867	0.000997687	0.00840515	1797	1469	1650	2272	2204	1922
CG10082	0.345083	7.16758	0.000998873	0.00840998	2240	1732	2194	2755	2860	2528
CG7692	-0.374183	5.38069	0.0010011	0.00842356	908	735	651	672	647	521
CG6852	-0.389499	5.22663	0.00101021	0.00849502	704	671	678	528	608	503
Syt12	0.816937	1.39246	0.00101161	0.00850164	33	28	27	53	68	41
CG6426	0.755543	1.57859	0.00101373	0.00851423	44	29	31	72	55	55
CG3376	0.397457	5.66916	0.00101535	0.00852261	868	656	622	1181	936	817
CD98hc	-0.322577	9.33976	0.00101701	0.00853133	13368	10534	11249	10846	10549	7936
CG5953	-0.621979	2.99059	0.0010178	0.0085328	161	128	174	89	112	111
CG32649	-0.448122	4.60447	0.00102081	0.00855276	538	397	433	307	358	368
CRMP	0.489177	3.68021	0.00102173	0.00855529	192	149	174	285	227	238
CG32702	-0.556941	4.52426	0.00102365	0.00856092	560	404	375	382	357	210
MFS17	0.37864	5.83638	0.00102327	0.00856092	804	768	828	1044	1125	1086
CG30101	3.26795	-0.472879	0.00103039	0.00861209	2	2	1	46	7	2
CG40006	-0.578603	3.83859	0.00103198	0.0086201	326	222	285	250	190	141
rdgB	0.60427	3.50235	0.00103829	0.00866758	148	126	158	261	187	234
Psc	0.373519	6.38899	0.00103975	0.00867448	1518	1046	1022	1756	1537	1490
CG8184	0.431122	8.12198	0.00104199	0.00867845	5184	3282	3252	6618	5013	4618
Nxt1	-0.343259	6.11475	0.00104141	0.00867845	1400	1202	1167	1020	1145	930
oaf	-0.342201	6.04434	0.00104212	0.00867845	1347	1105	1140	947	1052	942
CG16787	-0.413955	4.04871	0.00104457	0.00869357	370	274	276	241	267	208
CG9007	0.320357	7.66766	0.00104528	0.00869423	3550	2585	2723	3874	3738	3785
CG16935	-0.361235	5.14486	0.00105376	0.00875943	725	605	604	574	538	456
Fib	-0.334837	7.7918	0.00105584	0.00876611	4965	3355	3819	3122	3716	3089
klar	0.367935	9.11425	0.00105541	0.00876611	10152	6642	7045	12139	9887	9618
wls	0.288597	7.45877	0.00105867	0.00878435	2928	2374	2420	3471	3441	2901
CG32369	0.423232	4.84932	0.00106353	0.0088193	518	325	364	608	564	496
Ice2	0.412887	3.932	0.0010651	0.00882701	229	198	205	300	308	268
Max	-0.355782	5.92662	0.00106574	0.00882701	1282	907	1146	911	908	875
CG7006	-0.333529	5.61999	0.00106747	0.00883074	993	850	823	750	817	639
Rrp40	-0.406066	5.01929	0.0010669	0.00883074	684	562	552	472	561	383
CG17032	0.299919	7.89754	0.00107	0.00884629	4073	3002	3379	4781	4754	3833
Dcp2	0.304381	8.69751	0.0010853	0.00896741	6604	5632	5837	8231	7690	7297
dnk	-0.39205	6.25095	0.00108655	0.00897239	1595	1309	1307	964	1250	1110
14-3-3zeta	-0.297597	10.7274	0.00108979	0.00899372	33771	28596	28681	25853	27556	23692
E(spl)m8-HLH	0.433088	5.02733	0.00109325	0.00901686	494	391	462	608	772	520
Pde8	0.567835	4.72653	0.00109689	0.00904149	458	336	250	651	471	473
CG42678	-0.350391	6.50653	0.00109809	0.00904591	1801	1398	1761	1356	1455	1237
ec	0.312667	8.56194	0.0011027	0.00907842	6581	4742	5194	7270	6974	6910
RhoGEF3	0.450945	5.59335	0.00110663	0.00910532	854	530	620	1179	916	739
CG42353	0.354593	6.57247	0.00110858	0.00911593	1634	1240	1211	2067	1717	1625
SmD3	-0.338454	7.11731	0.00111011	0.0091231	2893	2349	2321	2147	2389	1705
tkv	0.304113	8.88469	0.00111251	0.00913733	7716	5935	6987	9363	8898	8191
twf	-0.383447	5.2912	0.00111399	0.00914405	890	625	655	655	601	469
CG14642	-0.987355	0.960064	0.00112328	0.0092148	55	23	42	18	25	19
CG15579	-1.32715	-0.0344571	0.00112994	0.00926388	16	20	24	7	14	4
Ack-like	0.363521	7.08195	0.0011321	0.00927394	2341	1786	1673	2937	2420	2361
Hers	0.371082	5.78531	0.00113251	0.00927394	990	606	766	1164	1041	943
CG7337	0.340461	6.43979	0.00113334	0.00927517	1473	1096	1175	1835	1583	1492
CG2263	-0.320353	6.86994	0.00113794	0.00930726	2475	1878	1995	1926	1864	1495
Fen1	-0.336204	6.16871	0.00114017	0.00932	1481	1170	1262	1072	1215	939
CG17754	0.559727	6.02949	0.00114576	0.00934961	1232	644	743	1726	1181	1048
CG42699	0.449717	4.84482	0.00114632	0.00934961	518	359	313	608	564	503
CG5181	-0.378555	5.13582	0.00114708	0.00934961	675	596	654	502	558	484
CG7911	-0.326123	8.69548	0.00114523	0.00934961	8091	7391	6917	6386	7023	5300
CG9270	0.990515	1.00839	0.0011472	0.00934961	17	23	21	31	52	44
CG3711	0.331282	6.83923	0.00114952	0.00936303	2017	1462	1489	2291	2115	2044
mRpS18B	-0.399695	4.95633	0.00115341	0.00938911	596	522	592	459	509	388
CG3625	-0.382893	6.21409	0.00115636	0.00940201	1549	1297	1246	981	1301	984
sqh	-0.293664	8.18514	0.00115606	0.00940201	6119	4509	5055	4698	4697	3883
CG8503	0.766464	1.76958	0.00116549	0.00947065	42	41	35	90	65	55
CG7029	0.332135	6.16846	0.00116631	0.00947172	1219	895	997	1472	1367	1220
CG42837	-0.316318	6.82658	0.00117166	0.0095095	2440	1754	1968	1829	1754	1541
CG8446	-0.316318	6.82658	0.00117267	0.00951211	2440	1754	1968	1829	1754	1541
kkv	0.32276	8.88601	0.00117701	0.00954167	8509	6086	6045	9756	8701	8179
Pex3	0.319897	6.2809	0.00117948	0.00955607	1301	1013	1060	1509	1527	1334
CG8187	-0.385106	5.14179	0.00118211	0.00957173	664	637	632	539	565	447
porin	-0.336131	10.0597	0.00118773	0.00961163	22516	17999	17664	18265	17036	12790
e(r)	-0.322703	6.5448	0.00118871	0.00961389	1917	1616	1521	1451	1497	1257
CG12576	0.347394	6.31843	0.00119136	0.00962955	1386	1060	989	1472	1621	1425
CG2260	-0.338644	5.77304	0.00119205	0.00962955	1253	819	926	848	875	724
CG17327	-0.366817	5.28681	0.00119324	0.0096335	782	695	657	565	655	507
in	0.371629	6.04245	0.0011964	0.00964772	1077	835	890	1475	1169	1120
r	0.304979	7.80058	0.00119632	0.00964772	5758	4760	4720	4582	4656	4155
CG6770	0.308546	8.14523	0.00119908	0.00966361	4495	3693	4123	5880	5290	4719
Hexo1	0.334541	7.86405	0.00121009	0.00974667	3803	2846	3412	5070	4522	3629
hiw	0.865118	1.20234	0.00121769	0.00980211	28	28	19	40	52	50
CG12582	0.290507	7.86545	0.00121858	0.00980355	3917	3109	3213	4647	4640	3747
smi35A	0.607246	6.09544	0.00122299	0.00983329	1176	698	798	2003	1183	1021
CG15168	-0.367685	5.43104	0.0012264	0.00985487	870	756	735	665	733	516
mRpL28	-0.336698	5.85711	0.00122711	0.00985487	1164	1002	979	845	1006	748
CG14567	-0.61874	2.3407	0.00122785	0.00985505	110	90	93	82	69	48
LSm3	-0.349565	5.85046	0.00123136	0.00987747	1131	1000	1007	856	1010	712
fdl	0.393029	6.01958	0.00123349	0.00988874	1188	795	774	1448	1188	1095
alpha-Spec	0.39603	9.13359	0.00123457	0.00989169	10428	6467	7054	12584	9801	9939
CG4159	-0.403714	4.91474	0.00123793	0.00991282	676	489	513	420	515	380
cdc2	-0.30785	7.82901	0.00124057	0.00992816	4329	3878	4002	3392	3768	3140
CG14438	0.31868	7.30192	0.00124948	0.00999366	2746	2040	2088	3157	2941	2765
CG40042	-0.294663	7.38117	0.00125755	0.0100524	3310	2813	2816	2546	2815	2238
Not1	0.432496	8.32332	0.00126325	0.010092	5904	3923	3623	7482	5484	5671
Tollo	0.307604	8.0774	0.00127275	0.0101621	4541	3578	3669	5313	4863	4918
CG8389	-0.315179	5.83677	0.00130561	0.0104184	1114	951	1013	921	920	742
Rcd-1r	-2.04392	-1.05339	0.00131134	0.010458	14	9	6	5	2	0
CG11892	-5.68786	-1.64097	0.00131385	0.0104598	17	3	0	0	0	0
CG13102	-2.04392	-1.05339	0.00131332	0.0104598	14	9	6	5	2	0
Pxd	-1.11039	0.417207	0.00131239	0.0104598	38	27	17	14	13	12
Ir	-0.333735	6.11033	0.00131955	0.0104992	1478	1173	1110	1096	1060	939
CG6424	0.383631	5.15089	0.00132433	0.0105311	621	423	464	767	651	614
CG13148	-1.6595	-0.295821	0.00133635	0.0106205	17	14	21	0	13	4
CG42724	0.292428	8.42825	0.00133736	0.0106224	5797	4441	4888	6917	6410	5887
Jon65Aiv	2.84271	-0.598898	0.00134481	0.0106754	3	0	3	12	34	2
CycK	0.31751	6.40715	0.00134675	0.0106846	1410	1124	1150	1667	1727	1383
Lig4	0.398878	4.14157	0.00134878	0.0106902	273	214	250	336	354	319
Nlp	-0.30874	9.60269	0.00134901	0.0106902	16458	13024	12575	12244	13165	9929
bi	0.369413	6.4944	0.00135096	0.010694	1627	1172	1062	1863	1661	1614
CG33082	0.505665	2.85492	0.00135104	0.010694	113	83	91	141	156	126
blos1	-0.395674	4.2252	0.00137142	0.010849	383	297	351	296	278	241
CG6023	0.610087	2.36782	0.0013733	0.0108577	73	67	54	108	117	84
Or22c	1.94453	-1.054	0.00137445	0.0108605	4	1	2	12	9	8
Cad96Ca	0.324191	6.43355	0.00137658	0.0108711	1449	1080	1219	1755	1607	1500
CG8370	0.320729	6.31797	0.00138615	0.0109404	1367	1058	1040	1530	1583	1372
RpL19	-0.294978	10.9316	0.00138734	0.0109435	41297	31156	32860	29135	32463	27324
sr	0.692386	3.90093	0.00139689	0.0110125	236	126	195	424	280	228
Ptp4E	0.348463	6.55054	0.00141034	0.0111122	1699	1214	1134	1919	1780	1617
et	-1.14372	0.0922809	0.00141742	0.0111616	22	21	21	12	11	7
CG33228	-0.427769	3.78213	0.00142132	0.0111859	281	238	244	190	206	193
CG32982	0.317323	6.78227	0.00143314	0.0112596	1831	1342	1613	2088	2242	1859
CG7598	-0.42359	3.80144	0.00143252	0.0112596	306	243	226	206	208	185
CG7781	0.731259	1.54219	0.00143157	0.0112596	38	33	31	66	53	57
CG8891	-0.356048	5.52199	0.00143964	0.0113031	930	823	753	676	782	586
CG9231	-0.399279	5.40874	0.00144032	0.0113031	832	788	720	568	738	550
CG17233	0.319937	7.27908	0.00144256	0.0113121	2756	1903	2118	3176	2984	2587
NijB	0.4726	4.282	0.00144311	0.0113121	275	271	239	427	426	292
chif	0.295161	7.37091	0.00144456	0.0113169	2843	2197	2224	3350	3006	2874
Pros26.4	-0.305292	8.21746	0.00144539	0.011317	6416	4670	5031	4913	4882	3753
CG32814	1.45143	-0.352201	0.00145465	0.011383	6	8	3	14	19	16
abs	0.342227	5.47779	0.0014566	0.0113849	762	596	559	898	832	786
CG5116	0.3136	5.60982	0.00145737	0.0113849	784	659	673	952	973	814
CG9634	0.287537	8.26089	0.0014568	0.0113849	5115	3930	4441	5782	5951	5338
l(1)G0289	0.427156	7.11661	0.00146156	0.0114111	2616	1739	1487	3067	2560	2435
bun	0.346169	7.15563	0.00146703	0.0114473	2444	1866	1831	2678	2602	2761
CG8290	0.318467	6.60591	0.00147161	0.0114766	1562	1257	1401	1859	1837	1764
2015-09-05	-0.337638	5.45652	0.00147544	0.0114999	887	775	720	682	707	576
CG7607	0.846687	1.34035	0.00148094	0.0115362	34	26	24	39	57	60
CG7049	0.343315	5.27803	0.00148225	0.0115399	624	476	564	750	793	652
akirin	-0.301007	8.91335	0.00148759	0.0115749	9404	7903	8587	7289	7450	7098
CG8607	-0.553293	4.03491	0.00149145	0.0115984	291	279	367	203	242	223
CkIIalpha-i3	0.362228	5.64401	0.00151383	0.0117657	716	671	728	903	1060	880
Aats-arg	-0.291037	7.31502	0.00152514	0.0118403	3160	2659	2711	2495	2574	2191
CG7430	-0.293916	7.76458	0.00152492	0.0118403	4699	3381	3657	3574	3485	2864
His4:CG33887	0.74212	1.63867	0.00153214	0.0118879	43	38	28	55	68	66
ATPsyn-beta	-0.290446	10.6031	0.00153464	0.0119006	31271	26460	25655	25032	25100	20916
SelD	-0.29469	8.44303	0.00154102	0.0119433	7135	5392	6202	5228	5833	4792
su(s)	0.327247	6.9596	0.00154441	0.0119629	2189	1657	1559	2560	2375	2087
spi	0.328807	8.19333	0.00155318	0.0120241	4466	3608	4541	5423	5883	5190
RhoGAP15B	0.339621	6.21134	0.00156093	0.0120772	1307	926	971	1549	1366	1274
Iap2	0.329694	6.06785	0.00156524	0.0121037	1132	811	961	1291	1314	1173
Meics	0.342528	5.18452	0.00156723	0.0121123	571	463	523	723	723	610
mRpL39	-0.321856	6.30424	0.00157009	0.0121276	1569	1321	1380	1287	1257	1021
CG32536	0.522098	3.30482	0.00157284	0.0121352	154	122	115	237	195	153
vps24	-0.321983	6.0987	0.00157261	0.0121352	1401	1156	1151	1038	1074	968
tsh	0.303198	8.38456	0.00157409	0.0121381	5336	4376	4854	6959	6494	5312
Atg1	0.332784	5.78919	0.00158226	0.0121942	986	650	763	1150	1067	907
fu12	-2.4037	-1.38848	0.00158751	0.0122278	9	9	4	2	0	2
Cp1	0.284205	7.95229	0.00159111	0.0122487	4360	3192	3386	4718	4934	4141
CG10492	0.311647	6.30379	0.0015965	0.0122813	1332	1011	1098	1554	1558	1321
G9a	0.290191	7.47666	0.00159803	0.0122813	3038	2453	2332	3470	3349	3098
Spps	0.332264	5.31961	0.00159754	0.0122813	691	509	526	777	806	669
dyn-p25	-0.463936	4.27423	0.0016036	0.0123173	365	391	324	269	305	247
CG9547	-0.411645	4.01972	0.0016048	0.0123196	366	251	285	226	258	217
Droj2	-0.28812	8.75463	0.00160761	0.0123343	8959	6822	7430	7020	7152	5603
CG6574	-0.409865	4.3008	0.0016101	0.0123465	378	332	377	274	321	259
CG11454	-0.416424	4.81267	0.0016116	0.0123511	609	492	463	377	482	359
CG15765	0.931086	3.79485	0.00162699	0.0124621	272	100	104	416	290	212
Trf2	0.569385	5.75612	0.00162856	0.0124672	965	671	506	1460	924	892
CG10732	0.316527	6.41333	0.00163891	0.0125395	1485	1065	1165	1721	1632	1436
CG3009	-0.585561	2.3497	0.00164006	0.0125413	108	91	93	78	75	50
Hsc70Cb	-0.295794	9.12289	0.00165262	0.0126303	12038	8842	9228	9357	8748	7326
CG40127	-0.419627	6.96469	0.00165674	0.0126407	2213	2267	2412	1608	2148	1660
CG6280	0.938695	3.4362	0.00165507	0.0126407	189	76	100	348	231	139
Gapdh2	-0.299853	9.60982	0.00165658	0.0126407	16748	12814	12643	12715	12911	10005
CG13359	-2.01611	-1.07895	0.00166787	0.0127185	5	12	11	2	2	3
CG31809	0.931476	1.00602	0.00167379	0.0127566	25	26	12	35	48	42
Wnt5	0.328437	6.84476	0.00168505	0.0128353	2012	1436	1544	2439	2083	1959
CoVIII	-0.355858	6.22102	0.00168778	0.012849	1576	1260	1249	1036	1320	965
CG41320	1.18772	0.875419	0.00168912	0.0128521	9	19	22	29	42	49
CG40439	-0.372592	6.06031	0.00170109	0.012936	1235	1165	1242	926	1039	970
CG1161	0.340462	6.28706	0.00170915	0.012983	1266	949	1145	1596	1616	1222
metro	1.62491	-0.662215	0.00170916	0.012983	7	2	3	19	9	11
kibra	0.370835	5.22855	0.0017116	0.0129944	660	448	492	768	673	690
elav	0.32842	5.70893	0.00171619	0.013022	871	701	687	989	965	980
mei-P26	0.436706	6.32237	0.00171829	0.0130308	1355	1121	847	1777	1400	1472
CG34278	4.89867	-2.114	0.00172202	0.013041	0	0	0	2	5	4
kon	0.385472	6.40357	0.0017233	0.013041	1429	1036	1126	1998	1530	1343
lid	0.439429	7.00321	0.00172344	0.013041	2418	1492	1471	3041	2264	2183
mRpS23	-0.371831	5.06798	0.0017211	0.013041	645	613	573	525	521	434
CG13029	-1.0639	0.283898	0.0017266	0.0130578	28	25	20	11	11	14
CG14701	-0.518796	3.81448	0.00173062	0.013081	273	289	235	185	234	165
Spt20	0.358776	5.87848	0.00173446	0.0131028	1079	712	741	1229	1066	1045
CG5059	0.369407	7.4068	0.00175049	0.0132167	2495	2005	2691	3026	3420	3210
Prosalpha1	-0.302919	9.84212	0.00175851	0.0132699	18180	15517	15650	14674	15584	11578
CG42365	-0.447621	3.41622	0.00176749	0.0133304	214	178	202	164	148	141
CG1646	0.284319	8.34392	0.00177236	0.0133598	5263	4281	4726	6064	6368	5635
CG30389	0.336236	6.90093	0.00177754	0.0133841	2181	1493	1516	2480	2214	2059
Plod	0.312811	6.93039	0.00177708	0.0133841	2127	1501	1700	2452	2446	1964
RpL14	-0.305748	10.811	0.00178005	0.0133957	40460	26966	30256	27342	28784	25277
CG15602	0.361922	4.36054	0.0017829	0.0134001	324	265	282	390	419	355
CG31690	2.82071	-1.68413	0.00178237	0.0134001	1	0	1	9	4	4
cwo	0.314109	6.52563	0.00178357	0.0134001	1526	1216	1262	1685	1798	1674
CG42364	-4.96224	-2.11234	0.00178858	0.0134305	2	4	5	0	0	0
CG15863	-0.481934	3.71873	0.00179087	0.0134403	238	239	260	186	210	158
Aats-asp	-0.276407	8.46018	0.0017929	0.0134482	7116	5661	6045	5635	5739	4791
CG42566	5.29708	-1.88436	0.0018013	0.0135038	0	0	0	10	5	0
CG17715	0.314063	7.02687	0.00181799	0.0136161	2036	1759	1853	2397	2569	2340
unk	0.331953	6.7296	0.00181826	0.0136161	1706	1450	1416	2019	1931	2012
CG9253	-0.292956	7.83788	0.0018253	0.0136614	4592	3889	3789	3566	3902	2983
CG7728	-0.301616	7.03909	0.00182657	0.0136635	2715	2223	2144	2036	2099	1832
kug	0.313814	8.67776	0.00183063	0.0136864	6970	5439	5439	8812	7298	6901
ppan	-0.320729	5.95287	0.00183184	0.013688	1245	1058	1043	905	1045	840
CG14082	-1.02708	0.399119	0.0018405	0.0137418	28	22	29	13	11	16
CG9512	3.33968	-1.88359	0.00184103	0.0137418	1	0	0	6	5	3
w	-2.5657	-1.55007	0.00184865	0.0137911	749	470	458	819	488	559
CG6208	-3.43858	-1.8815	0.00185194	0.0138082	4	4	6	1	0	0
CG10973	-0.355249	5.55731	0.00185566	0.0138209	888	835	835	662	793	636
Gl	-0.332911	6.88574	0.00185556	0.0138209	2639	1891	1934	2019	1719	1569
Rpt4	-0.301391	7.96854	0.00185751	0.0138273	5518	3872	4179	4158	4059	3195
CG5515	-0.31999	6.56596	0.00186135	0.0138483	1856	1669	1584	1558	1478	1240
Prosalpha7	-0.283402	7.90146	0.00186464	0.0138653	4965	3857	4003	3908	3945	3110
CG12909	-0.318928	5.61798	0.00186639	0.0138708	1001	853	798	760	811	644
Shal	0.895717	1.26797	0.00187288	0.0139115	23	28	26	68	47	36
Nup58	-0.312388	5.68895	0.00187412	0.0139132	1129	792	876	781	837	711
CG3792	-0.322852	6.30113	0.00187553	0.0139162	1609	1317	1343	1307	1264	989
RpS25	-0.288727	11.099	0.00187843	0.0139302	44328	36719	36562	33684	37187	29428
Arp3	-0.323678	7.02446	0.00188394	0.0139566	2915	2054	2132	2188	1985	1697
l(1)G0007	0.313942	6.61978	0.00188424	0.0139566	1749	1275	1271	1911	2008	1611
mRpS34	-0.403399	4.86444	0.00188504	0.0139566	597	497	517	410	511	351
CG32432	-3.43745	-1.88098	0.00189145	0.0139965	4	6	4	0	0	1
Cht6	0.501063	6.54335	0.00190078	0.014058	1718	1074	1022	2418	1568	1560
ns1	-0.293336	7.29977	0.0019041	0.014075	3162	2549	2745	2490	2520	2167
Ets98B	0.425399	4.08132	0.00190689	0.014088	239	223	234	325	323	325
eIF4AIII	-0.276154	7.4987	0.00191043	0.0141066	3735	2922	3018	2963	2932	2411
Clc	-0.286117	7.77992	0.00191256	0.0141148	4610	3479	3720	3687	3490	2884
CG1271	0.532025	2.98341	0.0019177	0.0141451	106	96	107	145	187	135
CG8671	0.314045	6.77953	0.00193248	0.0142465	1951	1385	1464	2240	2026	1897
C3G	0.37187	5.7933	0.00194243	0.0143121	1035	665	678	1167	985	1006
CG18788	-0.604398	2.11776	0.00194602	0.0143309	94	83	72	53	62	55
CG7568	-0.367588	6.23471	0.00195139	0.0143628	1403	1255	1451	1041	1275	1015
pen	-0.290641	7.4958	0.00197607	0.0145367	18114	13055	13019	15263	14711	12720
sgl	-0.330054	6.09518	0.00197833	0.0145455	1511	1088	1130	1113	1098	865
chic	-0.309593	10.0497	0.00198984	0.0146223	22938	17156	17373	18185	16758	13244
metl	-0.358501	4.8826	0.00199507	0.0146468	608	497	506	442	447	415
Rbm13	-0.315835	5.94946	0.00199531	0.0146468	1368	948	1042	981	999	812
CG30415	-0.321383	7.09084	0.00200326	0.0146974	2856	2265	2272	2142	2343	1683
CG17593	-0.339469	6.49683	0.00200549	0.0147059	2043	1482	1422	1521	1375	1152
CG10576	-0.284406	9.95154	0.00200829	0.0147123	20664	15997	16500	16297	16237	12869
CG34163	-0.421307	4.73453	0.00200851	0.0147123	519	488	467	340	431	376
CG14435	0.407227	4.53515	0.00201011	0.0147162	414	285	275	504	428	401
CG42663	0.336124	5.23002	0.00201201	0.0147222	661	457	504	743	751	625
CG10543	0.334943	6.17457	0.00201715	0.014752	1289	941	899	1423	1356	1292
ade3	-0.283773	7.7934	0.00202014	0.014766	4714	3572	3632	3340	3649	3145
CG32767	0.464373	5.68536	0.00202675	0.0147986	956	612	563	1173	840	992
CG6020	-0.319753	6.77945	0.00202646	0.0147986	2520	1685	1791	1700	1768	1486
myo	0.333954	6.89235	0.00203813	0.0148738	1756	1645	1688	2148	2402	2146
dgt5	-0.305558	5.76362	0.00204834	0.0149325	1065	903	950	807	909	744
Syx17	0.415879	4.14132	0.00204825	0.0149325	262	232	236	353	391	275
ImpE2	0.993512	10.9166	0.00205479	0.0149685	27296	11845	24899	75203	37110	20780
mus209	-0.299832	8.40845	0.00205546	0.0149685	6826	5555	5893	4824	5672	4916
CG7130	-0.587231	2.2297	0.0020588	0.0149849	95	81	92	73	63	50
CG9932	0.376885	6.29534	0.00206063	0.0149903	1381	1013	954	1579	1362	1527
Klc	-0.278987	7.37875	0.00206755	0.0150326	3430	2570	2915	2761	2563	2298
Nle	-0.317531	6.24459	0.00206927	0.0150372	1575	1295	1231	1133	1246	1040
His1:CG33810	-0.671747	1.65654	0.00207074	0.0150399	64	63	55	41	43	35
CG13994	-0.394088	4.46821	0.00207521	0.0150644	488	384	352	312	374	281
CG5794	0.389267	7.33693	0.00207793	0.0150762	2998	1964	1937	3634	2772	2871
Toll-7	0.291231	8.13198	0.00207956	0.0150801	4803	3724	3803	5517	5061	5027
CG31869	-0.534919	5.88297	0.00208329	0.0150992	1388	962	1071	1165	712	582
CG17734	-0.350359	5.24304	0.00208869	0.0151303	781	683	599	573	611	501
CG15485	1.02087	0.621137	0.00209565	0.0151712	12	20	13	27	39	30
Rpt3R	-0.565743	2.39184	0.00209653	0.0151712	111	101	87	78	67	65
CG17664	1.34464	-0.35476	0.0021008	0.015194	9	4	5	14	22	12
CG16868	0.353419	6.71753	0.00210273	0.0152	1997	1279	1279	2075	2007	1887
rpk	-0.450311	3.51982	0.00210487	0.0152075	234	181	225	183	169	136
mRpL21	-0.377477	4.89734	0.002111	0.0152438	622	523	492	449	499	366
CG17292	0.368525	5.43028	0.00211618	0.0152731	673	516	641	761	863	823
CG7158	0.307829	5.75467	0.00212216	0.0153082	925	672	759	1039	1001	974
CG9626	1.60697	-0.662227	0.00212757	0.0153392	4	2	6	20	12	7
dm	0.313776	8.20452	0.00213094	0.0153546	5152	4066	3651	5519	5582	5414
ptc	0.312839	7.17086	0.00213193	0.0153546	2492	1735	2067	2755	2708	2604
fd68A	0.272076	7.73905	0.00213518	0.0153699	3697	2811	2954	4027	4185	3629
CG1544	0.651103	3.50396	0.00214384	0.0154242	210	97	126	287	204	203
CG10566	-0.444693	3.36591	0.00215631	0.0155058	209	179	185	138	164	136
CG5273	0.3587	6.33655	0.00215783	0.0155086	1259	919	1271	1618	1576	1402
Aac11	0.290164	9.03893	0.00217987	0.0156589	8222	7054	7723	9707	10329	9254
Atpalpha	0.306703	9.78398	0.0021932	0.0157464	15799	10897	12012	18666	16414	14425
Rya-r44F	1.10564	0.0475979	0.00219923	0.0157814	11	7	10	26	19	18
gprs	1.89715	-1.0823	0.00220085	0.0157848	2	1	4	5	11	12
Zir	0.281688	7.72532	0.00220448	0.0158026	3526	2813	2977	4188	3851	3707
pes	-0.354116	4.99557	0.00222141	0.0159157	706	505	538	522	480	415
AGO3	0.761512	2.11077	0.00222691	0.0159468	45	63	42	74	104	89
CG17737	-0.295957	8.62556	0.00222887	0.0159525	7379	6823	6904	6208	6482	5309
CG14054	0.552911	2.95998	0.00223551	0.0159917	114	106	82	184	147	131
olf186-F	0.311212	6.28174	0.00223706	0.0159945	1312	960	1119	1469	1566	1327
CG7837	0.330887	5.13645	0.00224468	0.0160406	579	473	463	682	698	600
CG5390	0.280157	8.52284	0.00224726	0.0160507	5983	4897	5301	7237	7400	5864
CG15125	4.90137	-2.11388	0.00226274	0.0161529	0	0	0	6	1	4
CG32364	0.960891	0.84123	0.00226513	0.0161616	18	17	20	38	27	46
CG32313	-1.6473	-0.803605	0.00227313	0.0161934	13	9	12	2	5	4
CG3448	-0.442113	3.67338	0.00227167	0.0161934	251	219	239	176	180	186
Dmn	-0.296035	6.6066	0.00227205	0.0161934	2055	1561	1633	1517	1618	1303
CG30471	2.29978	-1.3912	0.00228274	0.0162535	2	0	2	9	9	4
CG3868	1.81695	-0.995726	0.00229488	0.0163314	6	0	2	11	10	9
Edg91	0.986073	1.11831	0.00229749	0.0163416	19	32	15	39	58	41
CG6066	-0.34358	5.06165	0.00230177	0.0163635	681	532	604	487	538	462
GRHRII	4.88849	-2.11467	0.00231679	0.0164618	0	0	0	2	7	2
CG14695	-4.95623	-2.11299	0.00231949	0.0164724	4	6	1	0	0	0
dsd	0.330921	5.67515	0.00232089	0.0164739	904	636	675	1104	961	821
kdn	-0.309004	6.75471	0.00232343	0.0164834	2385	1709	1764	1752	1757	1391
chas	0.320797	6.93091	0.00232587	0.0164922	2215	1490	1624	2534	2280	2054
Sox15	0.308567	7.11865	0.00233158	0.0165242	2249	1762	2039	2505	2757	2509
CG6724	-0.291452	6.55395	0.00233701	0.0165541	1899	1517	1624	1496	1502	1284
CG18327	0.889521	1.20261	0.00234674	0.0166145	22	16	36	46	49	48
Vha36-1	-0.306073	6.17243	0.00235109	0.0166367	1511	1163	1219	1175	1151	946
Psi	0.314701	7.58736	0.00235694	0.0166695	3441	2509	2456	4135	3483	3195
CG43066	2.25087	-1.4284	0.00236032	0.0166849	3	0	1	6	6	9
numb	0.281515	7.67901	0.0023621	0.0166888	3578	2605	2872	3968	3783	3620
mRpS25	-0.349962	5.12486	0.00237473	0.0167695	735	596	573	542	582	432
CG30421	0.325342	5.62563	0.00238051	0.0168017	863	607	673	909	934	924
hth	0.317772	7.83293	0.00240508	0.0169664	4000	2953	2991	5040	4155	3657
CG7650	-0.377451	4.81007	0.00241208	0.017007	569	471	499	385	445	400
Neu2	1.2521	0.0470341	0.00242382	0.0170723	10	7	9	34	15	16
sprt	0.440805	4.1082	0.00242284	0.0170723	232	211	261	325	357	316
CG14668	1.54803	-0.708463	0.00243359	0.0171235	7	3	2	16	10	11
GalNAc-T1	0.289211	6.7111	0.00243347	0.0171235	1715	1396	1481	1995	2043	1795
kat80	0.31047	6.34765	0.00243859	0.01715	1416	1035	1105	1684	1549	1338
CG7694	-0.365632	4.29923	0.00244548	0.0171896	395	337	342	280	316	271
Elo68alpha	3.32712	-1.88332	0.00246261	0.0173012	0	1	0	8	4	2
CG42245	0.290005	8.31223	0.00248603	0.0174568	5653	4052	4317	6549	5821	5355
MEP-1	0.289881	8.30924	0.0024894	0.0174716	5639	4047	4307	6535	5812	5341
RpL7	-0.274841	11.5042	0.00249106	0.0174743	61296	45251	49179	45554	48284	39611
PpD3	-0.290283	7.06641	0.00251414	0.0176272	2689	2126	2373	2139	2171	1807
Ahcy13	-0.29924	8.24316	0.00251971	0.0176482	6791	4879	4744	4927	4943	3938
CG12374	1.54569	-0.708025	0.00251883	0.0176482	6	3	3	17	9	11
beat-IIIc	0.904765	2.08117	0.00252831	0.0176995	76	29	37	122	68	80
CG9034	-0.394172	4.2246	0.00253588	0.0177434	439	284	315	290	282	243
c12.1	-0.310455	5.50152	0.00254178	0.0177756	962	710	777	680	749	618
Got1	-0.284517	7.52606	0.00254814	0.0178066	3887	3021	2988	3099	2978	2372
nbs	-0.334583	5.61297	0.00254879	0.0178066	933	829	884	682	826	681
CG3409	0.402235	4.64091	0.00255351	0.0178305	429	339	279	511	464	455
CG6678	0.433849	3.79731	0.00255707	0.0178463	211	176	184	292	243	265
E(spl)mdelta-HLH	0.381074	5.05563	0.00256286	0.0178776	523	401	480	651	746	512
Ir41a	-1.65733	-0.803446	0.00256794	0.017904	11	9	14	1	8	2
O-fut1	0.296737	8.12742	0.00256955	0.0179061	4349	3713	4132	5080	5883	4677
ade2	-0.2888	6.68868	0.00260485	0.0181429	2080	1675	1773	1618	1601	1478
par-1	0.295723	7.9418	0.00260799	0.0181556	4438	3218	3173	5022	4506	4199
CG8128	-0.479161	3.3128	0.00261288	0.0181727	226	182	152	137	160	120
Cortactin	-0.295519	7.74505	0.00261309	0.0181727	4768	3287	3554	3630	3349	2806
Axn	0.285689	7.41776	0.00262234	0.0182278	3002	2143	2402	3433	3082	2988
fok	0.517445	4.36887	0.00264826	0.0183893	308	224	292	535	394	304
Rel	0.320068	6.27426	0.00264702	0.0183893	1216	969	1163	1521	1582	1257
CG6709	-0.488536	3.19867	0.00265051	0.0183957	192	150	175	112	154	117
mRpL33	-0.393072	5.12774	0.00266547	0.0184902	641	651	623	474	565	487
CG8596	0.433642	5.86989	0.00266821	0.0184906	1026	655	762	1462	1104	856
Jafrac2	-0.290956	7.15088	0.00266715	0.0184906	2839	2316	2463	2143	2405	1935
CG7231	-0.538474	3.11865	0.00267202	0.0185076	190	157	149	154	110	92
tyn	0.422474	5.78814	0.00267521	0.0185204	926	743	636	1370	987	858
trr	0.325372	6.62406	0.00268129	0.0185531	1773	1236	1286	2114	1807	1640
asf1	-0.302549	6.86986	0.00268532	0.0185663	2334	1964	1989	1698	1976	1631
CG13920	-0.480687	3.34443	0.0026859	0.0185663	208	161	202	126	163	136
Set2	0.308696	6.49743	0.00268793	0.018571	1564	1192	1189	1884	1679	1503
CG15100	-0.295024	7.25685	0.00269491	0.0186099	3318	2412	2526	2529	2407	2035
CG9086	0.347502	7.59141	0.0027105	0.0187081	3612	2434	2314	4212	3469	3267
CG40178	0.425834	5.85759	0.00271727	0.0187361	743	751	888	983	1215	1149
RpII18	-0.312553	6.04608	0.00271659	0.0187361	1409	1039	1130	990	1114	884
CG43343	0.316396	5.84449	0.00272245	0.0187624	897	752	836	1084	1051	1076
Mov34	-0.298889	7.75656	0.00272435	0.0187661	4655	3406	3623	3750	3407	2710
l(3)mbt	0.293454	6.43458	0.00272779	0.0187804	1494	1122	1182	1681	1674	1468
eater	1.76649	0.564276	0.00273796	0.0188409	11	15	3	55	43	9
CG2217	1.20939	-0.0393778	0.00275386	0.0188748	13	6	6	13	26	21
[truncated: 11,750 more rows]

## Sheet: sas-4
Symbol	logFC	logCPM	PValue	FDR	sas4_rep1	sas4_rep2	sas4_rep3	yw_rep1	yw_rep2	yw_rep3
Hsc70-2	-7.54014	6.17906	9.0821990262576e-314	0	2305	2452	2279	13	11	14
CG31157	-7.70883	5.11972	1.11289e-238	7.65057e-235	1077	1132	1167	7	3	6
Cyp4p1	7.68889	5.12211	9.41618e-217	4.31544e-213	8	4	4	1103	1344	990
CG6912	7.47564	4.99621	9.39223e-215	3.22834e-211	8	6	3	1011	1149	976
CG15236	8.28402	5.42201	2.19993e-208	6.04938e-205	6	6	1	1291	1399	1509
Syt4	7.13305	5.97275	4.81456e-208	1.10326e-204	19	14	10	1736	2274	2134
Cyp6a17	-6.62753	4.9395	3.43017e-188	6.73734e-185	898	1045	1018	11	7	12
miple	-4.30685	6.01188	5.08386e-169	8.73724e-166	1906	1897	2203	118	91	98
Gr64c	-6.23676	4.50579	9.52326e-164	1.45484e-160	698	732	754	8	10	11
Gr64b	-6.23676	4.50579	1.12283e-163	1.54378e-160	698	732	754	8	10	11
Gr64a	-9.11477	4.24748	8.99108e-152	1.1238e-148	539	624	683	0	1	2
l(2)03659	-5.14563	4.6939	2.30448e-141	2.64036e-138	783	786	886	16	32	22
CG3984	6.77271	4.02992	2.02555e-140	2.14225e-137	3	5	6	533	564	496
CG34002	-6.03725	3.71505	1.19269e-120	1.17131e-117	413	383	461	5	5	9
CG17124	-4.16121	5.50543	4.54514e-118	4.16607e-115	1340	1316	1549	110	70	59
Sas-4	3.58469	5.09703	1.19754e-107	1.02906e-104	87	95	74	995	1150	977
Gr64e	-6.80802	4.03986	1.61098e-105	1.3029e-102	423	603	558	6	4	4
CG6330	-4.06474	4.63885	4.94175e-105	3.77467e-102	792	772	726	61	42	36
Gr64d	-8.4221	3.05756	1.3791e-104	9.97961e-102	248	257	298	0	2	0
AcCoAS	-3.03755	5.09611	3.09357e-95	2.12667e-92	1047	971	956	125	137	106
CG11594	-3.49446	4.70498	3.89224e-94	2.5483e-91	864	731	740	69	77	64
Ilp8	-6.26572	4.26649	2.24438e-90	1.40264e-87	544	787	512	6	9	9
Cyp4p2	8.14485	7.63651	3.5424e-89	2.11759e-86	47	17	4	6245	7423	6012
CG12224	-6.2888	2.92042	4.35516e-84	2.49496e-81	258	248	215	1	5	3
CG7966	-3.40275	4.67969	1.10937e-83	6.10108e-81	719	688	878	70	73	75
CG44085	-2.79385	5.02971	5.73775e-83	3.03417e-80	930	911	944	157	135	116
Ets21C	-4.6179	3.19938	1.23733e-82	6.30076e-80	306	277	271	12	14	9
CG32364	-3.97893	4.25098	2.53733e-74	1.24592e-71	529	568	646	38	27	46
CG4267	-5.43775	2.88844	7.02316e-74	3.3297e-71	207	224	268	9	3	4
Ddc	-4.46754	3.21728	1.16858e-71	5.35559e-69	304	297	259	12	10	17
CG42260	-5.87874	3.22681	7.05753e-71	3.13013e-68	361	295	234	6	4	5
GstE1	4.287	3.87571	1.52859e-70	6.56767e-68	21	26	22	384	521	464
CG43144	-3.39923	3.68557	1.82623e-69	7.60873e-67	385	381	374	36	32	41
Mmp1	-2.29634	7.33654	4.21636e-69	1.70502e-66	4614	4289	4225	1091	889	744
Gr64f	-5.00269	3.6027	1.35681e-64	5.32993e-62	281	428	434	17	12	7
del	-2.02482	6.27425	7.06038e-63	2.69648e-60	2020	1851	2207	537	525	453
CG42708	-4.36593	2.92183	2.25284e-61	8.37144e-59	274	201	223	11	13	10
Cyp6a23	-6.43555	1.98524	8.8401e-61	3.19849e-58	119	118	136	3	0	1
CG15784	-2.09269	6.23073	4.26856e-60	1.50483e-57	1914	2114	1909	464	483	463
SoYb	-2.81406	5.1901	8.98008e-60	3.08668e-57	1193	884	1045	182	125	142
rpk	-2.45722	4.99715	5.81488e-57	1.94997e-54	918	744	978	183	169	136
CG34215	7.2214	1.91092	1.95779e-56	6.40897e-54	2	0	0	112	119	126
wun2	-2.46953	5.14118	6.70874e-56	2.14508e-53	1006	828	1088	215	176	145
CG41520	2.94247	4.12794	7.10062e-56	2.21878e-53	63	72	60	496	505	517
ImpL2	-2.21032	5.58283	8.03301e-56	2.45435e-53	1288	1256	1305	333	303	213
scaf	-1.79712	6.99729	1.50385e-55	4.49489e-53	3141	3155	3406	931	993	903
unc-13-4A	6.74812	1.94994	2.19464e-55	6.42004e-53	0	2	1	143	108	116
CG15279	-2.47907	4.85915	3.7229e-53	1.0645e-50	712	870	815	133	164	139
CG4822	-4.75902	2.8047	3.79377e-53	1.0645e-50	188	244	217	15	2	7
CG32686	3.95544	2.68609	5.08152e-52	1.39732e-49	14	11	12	237	183	169
Klp54D	8.02618	1.92793	9.6931e-52	2.61315e-49	1	0	0	158	117	90
cac	-2.71481	4.3852	1.38778e-51	3.66935e-49	639	521	607	106	77	89
CG5282	-6.44479	1.62967	2.15676e-51	5.59495e-49	91	102	96	1	2	0
hig	5.80725	1.70225	3.42438e-49	8.71886e-47	3	1	1	94	118	93
CG33107	-2.43634	5.41868	5.56993e-49	1.39238e-46	1071	1181	1272	185	223	247
Ugt86Di	-1.79372	6.36382	4.10047e-48	1.00674e-45	2075	1879	2301	671	632	529
upd2	-4.44135	2.32106	5.978e-47	1.44196e-44	169	163	125	6	7	8
phr	1.82079	6.68997	2.37059e-46	5.61952e-44	659	821	743	2525	3003	2452
Tret1-1	-3.36314	3.51722	3.15181e-46	7.34479e-44	391	263	360	34	43	23
CG32681	3.07376	3.04503	1.66288e-45	3.8105e-43	35	25	24	275	248	200
CG3523	-2.03174	7.81256	4.22049e-43	9.51271e-41	7060	5154	5460	1371	1481	1507
CG4174	-6.10119	1.30569	5.33186e-43	1.18238e-40	76	75	77	0	2	1
CG14985	-2.32122	4.41847	7.81959e-43	1.70653e-40	540	536	661	136	109	107
pinta	2.65697	3.87736	2.07028e-42	4.44754e-40	52	60	83	412	450	386
Rcd2	-2.49418	3.88891	5.62564e-42	1.18995e-39	397	404	421	63	78	78
Ir76a	3.0953	4.30948	1.76663e-41	3.68021e-39	55	61	86	457	692	595
moody	-2.25575	4.58617	4.17303e-39	8.56343e-37	669	613	653	158	110	141
CG2898	4.37724	1.63267	7.66144e-39	1.54907e-36	7	2	4	109	92	81
CG31370	-2.5432	3.36826	1.21125e-37	2.41356e-35	248	280	326	46	52	50
CG15661	-3.65107	2.13555	2.34241e-37	4.60083e-35	116	116	157	8	12	11
St3	-3.09673	3.02154	7.79574e-37	1.50963e-34	193	253	256	20	37	26
GstD1	-1.3633	10.1174	2.13122e-36	4.06974e-34	26555	26642	25001	11140	10929	8884
CG42364	-9.08012	1.11537	2.29454e-36	4.32159e-34	49	74	78	0	0	0
CG13380	-4.37942	1.38087	3.36027e-36	6.24329e-34	80	75	78	4	3	4
CG7366	2.70135	3.07793	4.90532e-35	8.99243e-33	34	44	30	219	251	243
CG31436	2.76555	2.79574	9.1612e-35	1.65733e-32	24	38	23	197	214	179
Pvf2	-1.87862	5.30463	1.88598e-32	3.36758e-30	1061	857	1120	353	261	226
GstD3	-1.74782	7.14228	4.93486e-32	8.69865e-30	2751	3845	4045	1072	1124	1015
lig3	-1.54199	5.50948	6.77491e-32	1.17909e-29	1103	993	1218	395	386	370
Pvf1	-2.27114	3.19773	4.67729e-31	8.03851e-29	254	218	264	63	55	37
w	-6.27872	1.47123	3.41984e-30	5.80487e-28	947	779	790	819	488	559
CG15673	-4.02769	1.17357	7.51319e-30	1.22975e-27	62	65	71	5	6	1
CG42362	-2.70648	2.61935	7.49765e-30	1.22975e-27	150	180	182	30	19	30
CG42363	-2.70648	2.61935	7.39973e-30	1.22975e-27	150	180	182	30	19	30
NLaz	-4.99224	0.910527	1.22042e-29	1.97406e-27	50	55	63	3	2	0
insc	-2.14774	4.38318	2.27627e-29	3.63913e-27	633	520	504	158	104	117
Tdc1	-2.95096	3.18154	3.54747e-29	5.60623e-27	315	255	206	24	37	40
CG7900	-1.98569	4.11547	5.50781e-29	8.56281e-27	445	395	508	139	116	91
CG9192	-3.06429	2.86227	5.54287e-29	8.56281e-27	173	174	281	26	32	18
norpA	1.4667	7.01285	8.49567e-29	1.29786e-26	1270	992	1094	3155	3002	3199
CG10527	-1.89443	6.82419	1.33464e-28	2.01647e-26	2531	3652	2514	695	895	785
puc	-1.36706	6.01258	1.90417e-28	2.84569e-26	1653	1420	1472	612	615	559
Dif	-1.97168	3.69238	2.30633e-28	3.40964e-26	308	343	348	81	82	94
CG11880	-1.6246	4.88576	8.62211e-28	1.26112e-25	749	650	780	285	232	201
Ac3	1.74348	5.86653	1.57689e-27	2.28217e-25	421	436	453	1249	1487	1670
Muc68Ca	-2.29656	4.14407	1.70745e-27	2.44539e-25	467	536	423	122	75	97
CG7432	-1.71971	4.39575	1.80056e-27	2.55216e-25	518	560	492	154	180	150
SK	-4.75345	1.12708	1.67601e-26	2.35137e-24	83	45	68	2	3	2
CG9961	-3.88207	1.04498	3.0831e-26	4.28177e-24	55	63	61	4	6	2
Gfr	1.88272	3.57599	5.17237e-26	7.11149e-24	72	81	93	312	359	254
Appl	-2.11101	2.94336	6.9441e-26	9.45291e-24	188	216	198	41	52	48
CG13897	1.69365	4.38731	1.99649e-25	2.69116e-23	171	158	151	601	568	417
CG3168	-1.79902	6.09279	2.22748e-25	2.97336e-23	2033	1448	1705	656	507	361
CG34057	-2.5432	2.51616	3.07926e-25	4.07085e-23	161	153	155	39	29	14
tal-1A	-1.62367	3.76149	8.53115e-25	1.08606e-22	329	346	318	113	113	101
tal-2A	-1.62367	3.76149	8.53058e-25	1.08606e-22	329	346	318	113	113	101
tal-3A	-1.62367	3.76149	8.49775e-25	1.08606e-22	329	346	318	113	113	101
tal-AA	-1.62367	3.76149	8.37287e-25	1.08606e-22	329	346	318	113	113	101
CG7997	-2.39854	2.36006	8.84174e-25	1.11528e-22	128	146	139	30	20	29
scb	-1.87934	6.84341	9.88813e-25	1.23593e-22	3297	2329	3222	1125	721	607
CG18641	-3.1934	1.53534	1.4394e-24	1.78291e-22	76	86	84	16	4	7
CG5022	-4.072	1.22475	1.80682e-24	2.21804e-22	59	55	92	3	3	6
CG32373	1.28548	6.43279	2.0833e-24	2.5348e-22	765	828	862	1873	2208	1976
sec31	1.18877	8.27459	2.1041e-24	2.53766e-22	3384	2885	2967	7704	7396	6298
CG13117	-2.29337	3.39975	2.35627e-24	2.81708e-22	302	305	241	78	61	38
Tg	-2.12851	2.65607	2.43269e-24	2.88336e-22	154	172	167	32	43	39
Clect27	-1.54407	5.89581	2.68848e-24	3.1593e-22	1414	1554	1356	417	562	520
CG14907	-1.90918	3.47966	4.46794e-24	5.20591e-22	241	286	327	75	80	75
CG30345	-3.84305	1.7045	4.9215e-24	5.6862e-22	90	66	133	10	4	6
CG3253	-1.9614	3.35151	8.87697e-24	1.01708e-21	220	278	288	66	68	70
CG1924	4.5673	0.796413	9.35196e-24	1.06265e-21	2	4	0	65	52	37
CG10126	-1.71703	4.03884	9.49271e-24	1.0698e-21	438	374	414	145	139	96
CG7916	4.57747	1.00355	1.37395e-23	1.53581e-21	3	1	3	80	63	37
CG15282	1.78712	3.54781	1.7311e-23	1.90758e-21	90	78	86	353	300	241
Tep2	-1.15143	6.82551	1.73429e-23	1.90758e-21	2422	2522	2703	1326	1156	1017
tipE	-3.62812	1.11502	2.21985e-23	2.42228e-21	55	74	57	8	5	2
CG32111	1.20943	6.05108	2.49664e-23	2.70286e-21	667	583	707	1543	1628	1415
nAcRbeta-21C	-4.83135	0.764053	3.39577e-23	3.64753e-21	61	52	37	0	4	1
CG3588	-8.06117	0.17341	4.91373e-23	5.23712e-21	26	36	37	0	0	0
sda	-1.23798	8.44771	5.67603e-23	6.00306e-21	7679	8191	8103	3213	3517	3531
CG18853	1.2782	6.12907	5.95369e-23	6.24864e-21	600	711	683	1539	1842	1528
CG32017	-2.89965	1.4783	1.143e-22	1.19054e-20	69	72	90	11	8	12
CG14567	-1.88273	3.2427	1.18406e-22	1.22403e-20	225	228	268	82	69	48
CG1572	-1.44911	6.76527	1.23277e-22	1.26488e-20	2207	2797	2774	810	1139	937
gd	-3.05433	1.19947	3.44811e-22	3.5117e-20	64	58	69	6	10	7
Edg78E	-4.07228	0.971865	6.46491e-22	6.53574e-20	73	51	47	7	2	1
vir-1	-1.19464	6.21003	6.75893e-22	6.78311e-20	1774	1464	1803	823	772	642
CG43103	-4.36201	0.942315	7.84324e-22	7.81425e-20	38	66	65	1	5	2
CG3036	-1.78643	5.14118	8.98847e-22	8.89082e-20	1024	714	936	352	232	205
CG15546	-1.4208	5.02481	1.06051e-21	1.0415e-19	871	709	732	344	293	242
magu	1.1249	7.97245	1.17235e-21	1.14317e-19	2466	2770	2476	5742	6091	5253
Trn	1.30863	6.87531	1.92862e-21	1.8543e-19	1310	894	1101	2992	2677	2613
wun	-1.12595	6.09165	1.92756e-21	1.8543e-19	1535	1430	1607	744	777	609
CG15905	2.03542	7.29256	2.3767e-21	2.26925e-19	1213	717	1084	5882	3935	2831
unc79	-1.65685	4.0659	3.49356e-21	3.31261e-19	457	411	367	122	147	128
CG13890	1.26315	5.14846	3.83887e-21	3.61511e-19	312	315	391	850	899	732
CG17341	-8.58081	0.646795	4.3395e-21	4.05876e-19	23	59	60	0	0	0
CG11656	-2.26568	2.65857	4.6748e-21	4.34283e-19	199	144	160	48	29	29
Jheh1	1.58137	3.73578	5.22433e-21	4.82076e-19	89	116	118	348	352	284
CG5835	-1.60239	4.04598	6.10425e-21	5.59515e-19	452	376	380	153	143	109
CG13618	-4.47114	0.444191	7.04565e-21	6.41527e-19	38	35	44	5	0	0
Cpr67Fa2	3.20871	1.24186	8.52592e-21	7.71203e-19	2	12	7	64	81	56
ImpL3	-2.42068	4.52001	1.38426e-20	1.24393e-18	607	629	647	190	107	65
Scgdelta	-1.23458	5.45582	3.68079e-20	3.26498e-18	1025	901	1084	501	441	359
Socs36E	-1.01981	6.72109	3.67684e-20	3.26498e-18	2390	2217	2299	1126	1200	1121
CG1299	-1.21936	5.07485	4.33531e-20	3.82091e-18	759	807	731	333	353	315
fu12	-4.85119	0.51002	7.0472e-20	6.17146e-18	50	46	28	2	0	2
CG8997	4.64607	0.361247	7.52324e-20	6.54665e-18	4	0	0	46	35	30
MtnA	-2.04227	2.36474	8.9738e-20	7.7598e-18	143	127	127	42	34	22
yellow-b	-1.20817	5.40119	1.17339e-19	1.0083e-17	901	977	1000	410	490	367
swi2	1.52053	4.36325	1.32532e-19	1.13179e-17	170	148	200	461	539	501
CG13397	-1.56086	3.25732	1.37872e-19	1.17013e-17	244	210	237	81	79	77
CG14879	-2.31641	3.11299	1.74039e-19	1.46801e-17	162	238	297	46	57	39
CG44098	-4.21449	0.813223	1.75273e-19	1.46941e-17	69	35	49	5	1	2
CG2233	2.84413	1.66205	2.48454e-19	2.0703e-17	22	8	6	99	88	78
TwdlM	3.54869	1.17008	3.32964e-19	2.75778e-17	2	12	2	54	74	66
mRpL37	-1.01643	6.47798	6.36071e-19	5.23673e-17	1856	1956	2017	1024	1052	854
CG42238	1.15285	7.46557	6.82397e-19	5.58469e-17	1922	1542	1905	3650	4501	3916
Arc1	-1.34037	4.9229	7.96394e-19	6.47907e-17	689	671	762	307	339	210
CG10570	-1.68127	3.8277	8.11899e-19	6.49e-17	313	365	373	134	124	77
CG13679	2.57626	1.32063	8.10965e-19	6.49e-17	15	10	8	70	74	58
CG42502	-1.68127	3.8277	8.03907e-19	6.49e-17	313	365	373	134	124	77
CG7367	-1.76676	3.52942	8.49726e-19	6.75311e-17	308	256	302	107	97	56
Arpc3B	-3.80747	0.455047	1.04506e-18	8.2578e-17	34	38	43	3	4	1
CRMP	-1.30744	4.72293	1.16752e-18	9.17274e-17	622	564	648	285	227	238
CG14397	-3.81003	0.608996	1.30135e-18	1.0166e-16	34	53	42	2	4	3
cv-2	-1.1183	6.65479	1.93051e-18	1.49958e-16	2661	1970	2115	1100	1077	973
nrm	1.48641	4.14667	2.10829e-18	1.62848e-16	166	153	133	406	453	424
CG13654	3.77444	0.612532	2.49905e-18	1.91952e-16	3	6	0	54	37	39
CG3987	2.32922	1.57474	3.54229e-18	2.70572e-16	18	13	15	91	84	62
Ada	-1.6383	3.25749	3.61443e-18	2.74557e-16	213	240	247	93	66	69
CG3397	-5.86804	-0.0979564	5.41281e-18	4.08905e-16	29	23	27	0	0	1
CG31955	-2.15468	2.42318	5.92293e-18	4.44997e-16	110	142	168	27	33	35
Drep-2	-2.28356	1.54031	6.76028e-18	5.05148e-16	72	78	77	13	18	16
CG42666	-1.6031	4.13734	6.93479e-18	5.15386e-16	501	384	403	177	143	112
CG7433	-2.15128	1.85397	8.43646e-18	6.23617e-16	101	89	90	23	28	13
E(spl)mbeta-HLH	1.04276	6.7652	8.91901e-18	6.55762e-16	1179	1209	1082	2560	2781	1962
Cyp18a1	-3.35533	2.57027	1.44189e-17	1.0545e-15	208	158	154	35	11	6
UK114	-2.76377	1.17609	1.6147e-17	1.17463e-15	63	69	51	9	7	11
CG14741	-1.85866	4.39945	1.97658e-17	1.43031e-15	660	374	581	173	130	146
CG33306	4.45949	0.19547	3.21824e-17	2.31662e-15	1	1	2	40	25	32
CG34411	3.21994	2.30699	3.27317e-17	2.3439e-15	19	16	10	217	145	75
Caps	-2.12343	3.00388	7.68736e-17	5.47634e-15	165	190	276	38	59	49
PGRP-SA	-2.2388	1.6485	1.00294e-16	7.10795e-15	70	88	86	15	16	21
Cpr31A	1.99099	2.15715	1.03056e-16	7.26621e-15	37	22	26	132	109	103
gt	3.72343	0.696777	1.15361e-16	8.09236e-15	0	2	8	35	56	47
CG16710	2.42319	1.97436	1.42923e-16	9.97487e-15	15	26	17	88	141	90
CG18233	-5.04552	-0.11364	1.46524e-16	1.01745e-14	27	25	25	0	1	1
CG3788	-1.31234	5.05153	2.31415e-16	1.59885e-14	760	884	656	364	300	279
plx	-1.3879	4.95432	2.42469e-16	1.66685e-14	761	763	660	275	247	318
CG43338	-3.48832	0.599099	2.73699e-16	1.87219e-14	53	35	38	5	0	6
rumi	0.951048	6.22787	2.93098e-16	1.99496e-14	825	816	855	1608	1811	1481
CG2064	1.32294	3.66908	3.54548e-16	2.40132e-14	108	110	134	296	310	286
CG18577	5.90756	-0.0295529	4.6264e-16	3.11806e-14	0	0	1	26	41	17
phr6-4	-1.32362	4.19529	5.37654e-16	3.60595e-14	379	434	460	162	186	167
Damm	-2.63757	1.07418	5.58948e-16	3.73057e-14	51	58	59	4	11	12
Prosalpha1	0.889125	9.33556	7.46601e-16	4.95895e-14	6962	7254	7954	14674	15584	11578
Cul-2	-0.90108	7.87331	8.28528e-16	5.47665e-14	4807	4928	5201	2749	2764	2586
CG10151	1.46583	3.01653	8.36954e-16	5.50587e-14	60	70	77	196	199	185
nAcRalpha-96Aa	-3.92617	0.198547	9.17784e-16	6.00886e-14	40	28	27	3	2	1
CG6071	-1.50986	2.80744	1.00737e-15	6.56414e-14	155	168	176	62	67	49
CG7054	-1.0731	5.56948	1.15283e-15	7.47651e-14	947	1060	1136	526	587	410
CG1146	-1.05316	6.37065	1.20922e-15	7.80545e-14	2013	1743	1699	1047	903	730
CG6401	1.29285	3.7879	1.4484e-15	9.30566e-14	130	123	135	367	331	270
CG5953	-1.48569	3.59918	1.73626e-15	1.11032e-13	287	251	329	89	112	111
CG14207	-0.916066	6.88878	1.84254e-15	1.17283e-13	2548	2643	2372	1471	1362	1239
Cpr64Ac	-6.50505	2.05627	1.85938e-15	1.17809e-13	27	225	139	1	1	2
SerT	-2.37907	2.55953	1.89898e-15	1.19766e-13	224	128	123	37	35	21
CG18304	-3.66771	0.173722	1.99824e-15	1.25451e-13	31	33	28	2	2	3
CG17684	1.94696	2.05651	2.19327e-15	1.3707e-13	21	26	34	103	129	87
GNBP2	-1.25971	4.46248	2.23824e-15	1.39247e-13	459	514	541	192	247	202
p38c	-2.21843	1.39696	2.6592e-15	1.64691e-13	58	75	70	14	16	14
E(spl)m2-BFM	1.04678	5.57071	2.85851e-15	1.7624e-13	541	494	477	1123	1214	852
Gbs-76A	1.31795	5.12297	2.87785e-15	1.76641e-13	417	288	267	890	840	733
E(spl)malpha-BFM	0.875732	6.86458	5.02492e-15	3.07056e-13	1411	1301	1305	2672	2709	2125
Cap-H2	1.01176	7.28837	5.17352e-15	3.14738e-13	1669	1539	1865	3120	3650	3542
ana2	1.08481	5.26289	7.56718e-15	4.58331e-13	403	405	391	767	1007	807
Wwox	-1.14656	4.8459	9.64591e-15	5.81674e-13	572	675	683	283	305	294
CG11127	1.02853	5.35459	9.78937e-15	5.87747e-13	413	456	443	926	1031	770
fs(1)Yb	-2.87906	0.568212	1.16786e-14	6.98125e-13	42	40	36	5	8	3
CG13023	3.20443	4.33132	1.22543e-14	7.29368e-13	83	24	85	973	523	323
CG18234	-4.3273	0.0515883	1.68313e-14	9.97474e-13	37	30	19	2	1	1
mtg	-1.02893	5.74942	1.99085e-14	1.17477e-12	1312	1128	1084	680	573	504
CG6220	2.61072	2.92444	2.12212e-14	1.24688e-12	49	25	28	210	315	120
IntS12	1.43774	4.47664	2.24639e-14	1.31428e-12	201	231	150	496	612	497
CG13029	-2.28671	1.18087	2.90829e-14	1.69433e-12	50	58	67	11	11	14
CG13937	-3.8782	0.34621	2.92373e-14	1.69614e-12	29	50	27	1	4	2
CG6026	-1.60861	3.84529	3.2126e-14	1.85588e-12	358	340	353	87	121	138
Ptr	1.57255	3.1649	3.67772e-14	2.11569e-12	71	58	89	245	192	218
Ance	0.911579	9.80017	3.70034e-14	2.11983e-12	9574	10302	10389	22099	21208	14914
CG11073	-1.71201	3.96589	4.19564e-14	2.3936e-12	406	405	351	157	138	70
Men	-1.24356	4.60902	4.25903e-14	2.41972e-12	583	568	519	300	234	186
dpr19	-1.94803	2.82594	5.37011e-14	3.03842e-12	180	165	198	72	46	26
Hsp67Bc	4.51064	1.13388	7.40847e-14	4.17455e-12	3	3	2	80	99	20
CG1890	-0.874991	6.75517	9.41287e-14	5.28235e-12	2087	2440	2300	1364	1365	1065
spz5	1.92052	1.83604	1.09427e-13	6.11592e-12	17	32	21	100	94	77
GstE6	-2.21644	2.40622	1.104e-13	6.1453e-12	85	161	172	32	31	28
CG10337	-1.23669	4.40893	1.75262e-13	9.71642e-12	451	459	543	180	252	193
CG5080	-2.48812	1.08552	1.92687e-13	1.06396e-11	65	49	53	18	6	6
CG4998	-1.74406	2.44019	2.48256e-13	1.36531e-11	129	152	119	30	51	40
CG1139	3.6026	0.153171	2.76624e-13	1.51526e-11	4	1	2	42	28	21
CG7194	-1.85564	2.17764	3.84975e-13	2.1004e-11	92	129	117	28	28	38
CG32640	-0.955434	7.25861	5.55444e-13	3.0185e-11	2890	3252	3744	1960	1887	1356
CG31098	-1.76988	2.63794	5.58814e-13	3.02486e-11	131	180	151	37	64	37
Ada2a	0.860883	6.42564	6.34077e-13	3.41879e-11	937	963	1084	1777	2042	1679
CG5096	-1.54999	2.48922	7.04488e-13	3.78359e-11	145	108	149	43	55	41
GstE5	-1.91459	3.00818	7.79453e-13	4.16992e-11	163	211	240	83	44	39
CG10339	-3.58781	-0.0836334	1.12207e-12	5.97959e-11	25	23	27	2	4	0
CG7787	-0.928779	4.99562	1.24304e-12	6.59867e-11	649	644	748	389	375	324
CG32248	3.72465	-0.151051	1.68293e-12	8.89945e-11	1	3	1	27	27	18
CG34423	-2.68994	0.498766	1.75593e-12	9.24993e-11	34	44	32	5	6	6
png	-2.34624	0.840007	1.87009e-12	9.81371e-11	44	51	42	10	6	11
Spindly	-0.811342	6.59368	1.88592e-12	9.85911e-11	1978	1851	2190	1212	1188	1075
CG10257	-4.25197	-0.337451	1.9436e-12	1.01222e-10	19	18	26	2	1	0
Sk1	-1.57064	2.19058	2.02166e-12	1.0489e-10	127	97	102	39	36	36
CG3634	-0.825433	6.45701	2.1211e-12	1.09635e-10	1920	1826	1739	1149	1070	928
MED7	0.893617	5.87039	2.17479e-12	1.1199e-10	650	694	653	1197	1450	1126
CG9411	-1.60307	4.49748	2.66146e-12	1.36539e-10	688	596	366	208	171	173
CG31817	1.56991	2.56995	2.92898e-12	1.49705e-10	53	40	50	140	184	110
upd3	-1.91489	1.42567	3.19923e-12	1.62912e-10	66	64	69	17	13	23
CG42854	-3.39096	-0.0508823	3.22319e-12	1.63527e-10	25	27	24	2	1	4
CG31809	2.75405	0.651296	3.50333e-12	1.77086e-10	12	2	4	35	48	42
CG8908	2.20094	1.27783	3.51823e-12	1.77187e-10	11	14	15	46	73	68
CG42562	2.14614	1.05418	3.72101e-12	1.86686e-10	11	7	17	50	56	52
Fps85D	0.812903	7.99099	3.73399e-12	1.86686e-10	3164	2761	3107	5483	6138	4532
CG1835	2.25846	1.02834	3.97265e-12	1.97899e-10	11	12	9	67	55	36
TfIIFbeta	0.840397	6.00452	4.34623e-12	2.15727e-10	723	759	764	1345	1543	1202
sea	0.818946	6.84246	5.92379e-12	2.92972e-10	1189	1432	1435	2550	2625	2107
gammaTub37C	-4.61777	-0.472246	6.20867e-12	3.0596e-10	15	23	19	0	2	0
Jra	-0.792424	6.21793	6.2651e-12	3.07639e-10	1607	1452	1553	942	979	786
CG15739	-2.09439	1.17496	6.89516e-12	3.37372e-10	46	62	62	10	14	16
CG13678	3.04387	0.364854	7.02612e-12	3.42561e-10	3	7	2	24	43	36
Cyp9f2	-1.04875	3.76415	7.83364e-12	3.80582e-10	299	281	309	138	155	142
CG11155	-1.62894	2.80285	7.91816e-12	3.83334e-10	129	177	202	50	72	45
CG31875	-1.61087	2.47552	1.08873e-11	5.25147e-10	161	113	128	55	35	43
CG6701	0.774894	7.49235	1.09239e-11	5.25147e-10	2041	2117	2339	3820	3823	3608
Spn55B	-0.961708	5.13763	1.32299e-11	6.33791e-10	824	755	688	464	385	336
CG11700	-0.915658	5.87717	1.33088e-11	6.35357e-10	1292	1167	1295	817	685	528
CG13386	-5.21183	-0.644789	1.35656e-11	6.45374e-10	13	17	20	0	0	1
CG34325	-1.59012	3.24912	1.3856e-11	6.56916e-10	171	284	234	95	72	66
CG18507	-1.11375	5.62615	1.4644e-11	6.91892e-10	1088	1246	956	428	559	549
His1:CG31617	-1.23172	3.60252	1.48655e-11	6.99953e-10	230	311	284	121	119	116
Rpt3R	-1.2578	2.86681	1.52911e-11	7.17533e-10	164	148	184	78	67	65
ltd	-1.6933	2.57552	1.54008e-11	7.20221e-10	162	113	163	63	46	29
CG33491	-2.24486	4.01516	1.61206e-11	7.51328e-10	597	471	225	123	98	60
CG13692	-1.58765	2.04211	1.79083e-11	8.31829e-10	80	108	106	31	36	32
CG6044	-1.10762	5.4951	2.03665e-11	9.42825e-10	1052	860	1100	614	472	342
CG16984	-1.48558	2.37759	2.30388e-11	1.06295e-09	108	114	145	41	56	36
His2B:CG17949	-1.16137	4.28922	2.33663e-11	1.07446e-09	377	488	448	223	181	191
CG32641	-0.902446	6.3085	2.67998e-11	1.22823e-09	1475	1665	1909	1039	998	719
GS	-0.930476	8.06036	2.76746e-11	1.26411e-09	6390	6074	4622	3105	3172	2833
CG7328	1.58968	1.88739	3.24738e-11	1.47842e-09	30	25	32	107	86	74
Gadd45	-1.07822	4.03481	3.30094e-11	1.49784e-09	381	316	385	178	170	170
CG33307	3.14692	-0.0569823	4.80821e-11	2.17461e-09	3	0	5	26	29	20
CG43117	2.70502	0.194987	4.96144e-11	2.23655e-09	3	3	7	29	31	28
Cyt-c-p	-0.828182	6.32468	5.77178e-11	2.59334e-09	1496	1776	1735	985	1091	799
CG7409	2.06304	1.35745	5.79782e-11	2.59655e-09	19	12	15	55	59	80
f	-1.404	3.53408	7.09664e-11	3.16791e-09	347	256	211	106	108	98
mtsh	-1.59978	2.05268	7.206e-11	3.20632e-09	89	100	108	23	42	34
synaptogyrin	-2.20846	0.682941	7.36858e-11	3.26808e-09	34	40	46	9	7	10
CG5375	-1.63642	1.73475	7.47542e-11	3.30481e-09	76	78	84	24	21	32
pgant8	2.30021	0.830874	7.54745e-11	3.32596e-09	7	8	12	62	41	34
Cyp6d4	-1.07544	4.33644	7.72075e-11	3.39146e-09	375	446	513	237	220	186
Gs2	1.6864	3.52059	8.57426e-11	3.75438e-09	70	108	85	216	288	346
dnc	0.943395	4.30592	8.71772e-11	3.80508e-09	230	204	224	432	459	393
AnnX	-1.37657	4.80217	9.37184e-11	4.07764e-09	810	691	457	311	263	198
CG8563	-1.90748	1.12853	9.80304e-11	4.2518e-09	54	59	47	16	12	15
kcc	-0.928182	4.45771	1.08304e-10	4.6826e-09	444	449	510	270	253	225
LamC	-1.46125	6.53897	1.11603e-10	4.81012e-09	1795	2977	1864	589	933	912
CG8451	-1.17342	3.94862	1.20217e-10	5.1652e-09	339	298	404	137	183	147
His2B:CG33908	-1.26352	2.9453	1.27538e-10	5.46266e-09	193	174	157	91	70	61
CG10089	1.2279	2.9787	1.30183e-10	5.55863e-09	69	73	85	212	166	162
mthl10	0.754482	6.31505	1.45145e-10	6.17834e-09	996	926	973	1594	1745	1604
Cys	-1.51549	1.75894	1.51859e-10	6.44418e-09	71	87	79	31	28	25
CG14082	6.74745	-0.92257	1.53634e-10	6.49941e-09	0	0	0	13	11	16
CG30392	1.0101	4.47208	1.76418e-10	7.44041e-09	201	255	260	477	544	444
CG13954	-1.81749	1.32209	1.97821e-10	8.31756e-09	52	60	70	12	21	19
CG5731	0.889494	5.67732	2.02609e-10	8.49288e-09	555	495	705	1225	1112	961
CG43333	-1.0633	4.271	2.05935e-10	8.60608e-09	467	383	421	251	200	168
tko	0.842558	4.95369	2.19356e-10	9.13917e-09	358	379	343	704	700	568
CG14257	1.49356	5.45979	2.49771e-10	1.03749e-08	468	253	407	1518	1047	691
CG33469	-3.76298	-0.412901	2.57192e-10	1.0651e-08	14	23	21	3	1	0
Rbp4	-1.59686	2.01466	2.72193e-10	1.12384e-08	122	81	86	37	35	25
Adgf-D	3.8289	-0.336544	3.581e-10	1.47411e-08	2	0	2	14	21	27
CG13609	-1.33596	2.43426	3.6897e-10	1.51432e-08	115	122	134	41	63	45
His2B:CG33872	-1.11552	3.16154	3.88699e-10	1.59054e-08	181	214	196	104	90	83
beta4GalNAcTB	-0.908398	4.92306	4.19152e-10	1.71007e-08	619	690	618	345	336	357
CG6753	-1.75558	1.3206	4.30133e-10	1.74967e-08	53	63	64	26	15	13
CG3191	2.76928	0.331695	4.31418e-10	1.74973e-08	2	2	10	29	30	39
Men-b	-0.738164	6.35282	4.54778e-10	1.83904e-08	1623	1685	1683	968	1095	969
Ddr	1.25964	3.37404	5.04708e-10	2.03496e-08	124	86	85	283	223	212
Ir41a	-2.84427	0.0635022	5.30929e-10	2.13443e-08	30	21	29	1	8	2
CG42361	1.28392	2.52221	5.7405e-10	2.30105e-08	60	48	52	125	131	138
CG17224	-1.56	1.86846	6.32581e-10	2.5283e-08	93	66	100	30	36	23
E(spl)mgamma-HLH	1.28327	3.32806	6.54051e-10	2.60654e-08	83	107	92	193	289	216
grass	1.1754	3.01292	6.64393e-10	2.6401e-08	77	91	70	179	211	158
CG6018	-3.62904	-0.514136	7.25509e-10	2.87464e-08	18	15	20	2	1	1
CG32850	0.833357	5.67807	7.60525e-10	3.00473e-08	552	549	698	1024	1237	989
GstT3	0.953658	4.34268	7.75686e-10	3.05585e-08	237	206	229	409	509	403
CG2663	1.39292	2.75812	7.79109e-10	3.06056e-08	52	53	74	202	158	120
Ac78C	-2.94032	1.17335	8.05039e-10	3.15341e-08	29	59	98	9	5	10
CG14921	2.18663	0.47352	9.19165e-10	3.59023e-08	7	10	5	33	37	33
Corp	-1.5109	1.97516	1.0706e-09	4.16989e-08	89	77	111	26	38	34
Toll-9	-1.57589	1.91338	1.23012e-09	4.77767e-08	113	69	86	35	30	26
CG6574	-0.872457	4.61181	1.24263e-09	4.81265e-08	482	497	562	274	321	259
CG15766	1.61428	1.85871	1.28682e-09	4.96979e-08	22	36	26	73	106	83
CG31869	-1.16658	6.31734	1.40147e-09	5.39743e-08	1950	1454	1999	1165	712	582
CG16800	-3.94882	-0.577688	1.51174e-09	5.80585e-08	11	20	20	2	0	1
CG14683	-0.688239	6.93494	1.6223e-09	6.21308e-08	2311	2394	2680	1628	1719	1317
Spn42De	-0.967478	4.16074	1.89481e-09	7.23661e-08	336	410	404	200	214	183
CG17841	-0.91878	5.19847	2.01569e-09	7.67691e-08	802	883	652	473	439	350
obst-E	-2.85745	0.187225	2.08531e-09	7.92015e-08	18	41	29	3	4	5
CG1942	-5.06551	-0.763074	2.13054e-09	8.06965e-08	16	21	8	0	0	1
CG32368	2.94045	-0.21646	2.16654e-09	8.16498e-08	3	3	2	20	27	18
HPS4	0.775295	5.51328	2.16759e-09	8.16498e-08	553	480	613	978	974	899
CG34452	3.34176	-0.455689	2.20342e-09	8.27727e-08	1	2	2	22	18	15
CG33496	-2.20754	2.93903	2.25543e-09	8.42549e-08	284	226	96	58	40	36
CG42561	1.67247	1.18362	2.2518e-09	8.42549e-08	15	15	20	52	54	56
CG6788	-4.21063	-0.789287	2.26126e-09	8.42549e-08	14	15	14	0	1	1
Edem1	0.783811	5.91407	2.30131e-09	8.55153e-08	730	623	814	1427	1237	1120
jigr1	0.696054	7.24163	2.36798e-09	8.77556e-08	1786	1766	2101	3021	3385	2874
CG15599	-4.85957	-0.922145	2.43344e-09	8.99393e-08	11	14	14	1	0	0
CG14696	-0.913188	5.21087	2.52048e-09	9.29063e-08	684	870	803	378	449	438
CG17119	-2.02666	0.634709	2.55685e-09	9.39949e-08	34	41	38	8	15	5
Mipp1	1.79896	1.1328	2.61257e-09	9.57874e-08	10	18	17	50	50	59
dtr	1.50971	1.81359	2.78955e-09	1.02004e-07	40	24	22	81	89	79
Rcd6	-0.881456	4.40811	2.95426e-09	1.0774e-07	409	436	495	248	258	231
Traf4	-0.950603	4.74045	2.99968e-09	1.09107e-07	631	572	512	367	286	251
CG9279	-1.47993	1.61213	3.0611e-09	1.11048e-07	83	65	64	26	29	22
CG13045	1.63269	1.92192	3.20976e-09	1.16134e-07	37	23	27	116	100	61
E(spl)m8-HLH	0.983968	4.84806	3.42046e-09	1.23433e-07	335	343	262	608	772	520
CG31798	-1.63739	1.87255	3.57602e-09	1.28466e-07	92	78	93	37	16	32
Gpo-1	-1.26975	3.92611	3.57861e-09	1.28466e-07	315	443	282	138	164	137
qin	-1.32259	2.97773	3.6495e-09	1.30669e-07	220	129	195	74	79	67
CG10026	-2.69314	0.835117	3.76669e-09	1.34515e-07	61	21	60	8	10	4
dream	-1.13378	2.80591	4.67243e-09	1.66428e-07	162	132	169	84	69	61
Cpr76Bc	-6.48513	-1.13115	4.79974e-09	1.70433e-07	10	9	14	0	0	0
tnc	-1.71682	8.42516	4.80966e-09	1.70433e-07	10955	5501	9426	4403	2124	1558
Fim	-0.716161	7.28042	5.04812e-09	1.78423e-07	3253	2774	3436	2250	1923	1678
Myo61F	-0.70011	6.56917	5.12259e-09	1.80591e-07	2049	1775	1923	1364	1211	1023
E(spl)m4-BFM	0.827204	5.48791	5.21795e-09	1.83482e-07	583	543	450	928	1066	851
otk	-0.848049	6.69354	5.50725e-09	1.93161e-07	2531	1797	2185	1511	1137	1030
dpr6	6.50081	-1.10253	5.73921e-09	2.00785e-07	0	0	0	14	13	7
CG10200	-0.736301	6.98444	6.49742e-09	2.26733e-07	2598	2324	2824	1855	1652	1235
5-HT1A	6.4196	-1.1655	7.12909e-09	2.48147e-07	0	0	0	10	13	9
CG8066	-1.5411	1.38569	7.878e-09	2.73522e-07	54	60	68	21	18	24
CG30269	-2.21902	0.344596	8.79033e-09	3.04429e-07	32	34	27	11	3	6
PGRP-LC	-1.72945	2.32841	9.82825e-09	3.39519e-07	173	75	122	38	44	31
CG14321	6.66338	-0.981342	9.86718e-09	3.4001e-07	0	0	0	6	21	11
CG18598	1.23415	2.15467	1.00008e-08	3.43752e-07	45	44	37	98	116	88
CG8172	1.54188	1.59216	1.0197e-08	3.48754e-07	29	23	20	61	91	62
Peritrophin-A	-1.28836	2.17836	1.01751e-08	3.48754e-07	109	110	87	38	48	41
Pax	-0.677271	6.85651	1.03093e-08	3.5172e-07	2330	2253	2388	1742	1479	1220
dpr18	-3.11885	-0.264798	1.04187e-08	3.54571e-07	14	19	30	3	1	3
CG42678	-0.616574	6.69183	1.05414e-08	3.56978e-07	2032	2078	2002	1356	1455	1237
Tsp42El	-1.34938	2.58321	1.05404e-08	3.56978e-07	103	156	154	48	61	55
mago	-0.677533	6.91579	1.09708e-08	3.70607e-07	2170	2467	2626	1498	1705	1406
NaCP60E	-0.810855	5.43175	1.5067e-08	5.07736e-07	993	814	877	588	462	498
E(spl)m7-HLH	0.729458	5.37498	1.51649e-08	5.09784e-07	532	465	527	888	956	727
CG32392	-2.12498	1.262	1.52744e-08	5.12214e-07	81	50	51	23	6	13
gkt	-0.697809	5.63371	1.83269e-08	6.13083e-07	1014	1049	932	646	674	558
CG7675	0.938879	7.39912	1.83891e-08	6.13668e-07	2140	1516	2013	4821	3586	2697
CG3520	-0.674633	5.95211	1.8634e-08	6.20336e-07	1322	1151	1246	793	828	740
CG30273	-2.20485	0.333277	1.88158e-08	6.24874e-07	25	39	28	9	5	6
Slob	-3.96741	-0.556276	1.89912e-08	6.29181e-07	27	9	16	1	0	2
CG6904	0.607726	7.7568	1.97864e-08	6.53951e-07	2812	2724	2845	4472	4611	3888
CG3714	-0.683528	5.34357	2.06431e-08	6.80629e-07	782	848	810	546	537	461
CG13188	-1.36043	2.82099	2.133e-08	7.01595e-07	120	200	169	56	73	64
CG13278	-1.2815	1.92238	2.31345e-08	7.59133e-07	78	81	96	31	39	36
CG18661	0.850053	4.14808	2.41722e-08	7.91296e-07	213	210	191	398	389	338
CG10098	-0.704515	6.12975	2.49898e-08	8.16116e-07	1501	1297	1444	1038	874	737
CG14695	-6.52753	-1.09934	2.67269e-08	8.70779e-07	5	12	17	0	0	0
CG44102	-2.69634	0.947365	2.76532e-08	8.98826e-07	88	31	35	8	12	4
CG11261	-1.03052	3.31751	2.98051e-08	9.66488e-07	200	203	245	91	126	104
CG9737	-1.8069	1.28692	3.01092e-08	9.74051e-07	41	69	67	11	22	18
kek2	-1.77137	0.830821	3.11006e-08	1.00376e-06	47	35	44	11	10	16
CG42343	-6.34953	-1.23067	3.11749e-08	1.0038e-06	13	7	10	0	0	0
CG4210	-0.893159	4.83133	3.2461e-08	1.04277e-06	512	614	678	288	374	321
bond	1.3814	1.73762	3.49978e-08	1.12164e-06	20	30	37	76	78	76
Gbeta5	-1.49547	1.18602	3.58143e-08	1.14514e-06	50	56	50	22	18	16
pain	-0.950867	6.68829	3.8533e-08	1.22921e-06	2555	1823	2276	1584	1108	829
CG5367	-1.47849	1.39383	3.8939e-08	1.23929e-06	55	63	63	30	22	14
CG30026	4.62775	-1.06922	4.10011e-08	1.2989e-06	0	1	0	9	13	12
CG6583	0.663237	6.40062	4.09837e-08	1.2989e-06	1020	1038	1138	1608	1907	1614
uzip	-0.668739	6.72166	4.14149e-08	1.309e-06	1869	2070	2398	1322	1382	1325
CG5830	-0.602817	7.99275	4.16269e-08	1.31268e-06	4983	4733	5315	3468	3480	3086
Ir85a	1.49013	1.23282	4.52572e-08	1.42389e-06	16	18	23	62	50	51
CG3603	-0.831067	4.36299	4.65774e-08	1.46208e-06	422	463	395	255	252	224
CG15117	-2.93586	0.356871	4.73884e-08	1.48415e-06	15	43	43	1	6	6
CG5527	-2.42256	-0.0525401	5.09737e-08	1.59281e-06	25	26	19	5	6	2
GstD2	-2.01586	0.485719	5.5049e-08	1.71626e-06	36	23	42	8	9	8
Orco	4.80438	-0.948786	5.56596e-08	1.73137e-06	0	1	0	11	8	19
Obp73a	-1.48868	1.24706	5.59555e-08	1.73664e-06	58	53	52	22	25	12
MED11	0.692837	5.27509	5.74703e-08	1.77964e-06	449	493	501	793	898	683
CG13359	-2.87618	-0.451671	5.97752e-08	1.84685e-06	15	21	17	2	2	3
CG10383	-0.890265	4.2493	6.41632e-08	1.97798e-06	398	380	424	195	227	232
vib	-0.643686	7.29595	6.74714e-08	2.07531e-06	3038	2795	3551	2234	2072	1789
nab	0.867009	6.9383	6.95323e-08	2.13393e-06	1517	1595	1121	2245	2921	2655
CG6785	-1.14023	2.18806	7.10018e-08	2.17417e-06	106	99	94	53	50	35
GstE8	-1.3613	2.24846	7.16394e-08	2.18882e-06	79	110	138	50	42	37
VhaSFD	0.594186	7.31148	7.32943e-08	2.23442e-06	2150	1937	2104	3416	3283	2796
CG5535	-1.12109	5.49856	7.53263e-08	2.29129e-06	717	1129	1176	354	570	480
krimp	-0.907171	4.74116	7.60162e-08	2.30246e-06	477	516	710	292	341	286
nxf2	-0.630863	6.33728	7.60287e-08	2.30246e-06	1560	1469	1777	1074	1096	974
CG1638	1.6872	1.05402	7.93608e-08	2.39283e-06	15	16	14	37	65	46
Cpr66D	0.901014	4.44284	7.93564e-08	2.39283e-06	289	242	206	447	511	439
GstD4	-2.12336	0.21084	8.08155e-08	2.43136e-06	23	25	35	6	6	7
CG8317	-1.0836	2.54024	8.39222e-08	2.51931e-06	143	123	113	67	67	48
CG5039	0.844862	3.68359	8.5354e-08	2.55671e-06	148	150	147	274	265	270
CG5568	-2.66044	-0.31821	8.61003e-08	2.57346e-06	16	22	20	1	5	3
Nnf1b	-0.966313	3.36869	1.00306e-07	2.99156e-06	183	236	242	112	123	108
CG32581	0.594349	6.99018	1.04e-07	3.09501e-06	1605	1611	1737	2707	2775	2133
CG11897	-0.874836	4.12742	1.08566e-07	3.22392e-06	370	346	384	246	185	178
CG43265	-2.58901	-0.246385	1.14536e-07	3.39386e-06	17	27	17	4	3	3
Cyp9c1	-0.694975	5.92625	1.15877e-07	3.42622e-06	1089	1364	1213	780	823	699
Pxd	-1.65894	0.813611	1.19269e-07	3.51894e-06	36	47	39	14	13	12
Pvr	-0.689418	6.69846	1.19827e-07	3.52784e-06	2249	1822	2203	1600	1229	1124
amd	-0.982872	3.53404	1.23325e-07	3.62306e-06	301	230	214	131	139	113
beat-IIb	-2.09604	1.61527	1.24849e-07	3.65223e-06	115	59	60	31	17	8
toe	0.757136	5.2576	1.24688e-07	3.65223e-06	517	471	397	786	912	687
CG6602	-1.65605	0.847284	1.28754e-07	3.75848e-06	42	47	36	11	15	14
ltl	0.602482	6.98398	1.34969e-07	3.93155e-06	1753	1449	1717	2640	2591	2336
CG7231	-1.06477	3.4793	1.35474e-07	3.93792e-06	267	200	265	154	110	92
CG9812	1.28429	3.24771	1.36304e-07	3.95368e-06	116	85	65	271	238	156
CG30427	-3.29616	-0.763967	1.37361e-07	3.96761e-06	13	16	13	0	2	2
CG5379	-2.29263	-0.0514481	1.37203e-07	3.96761e-06	24	26	19	5	4	5
Aprt	-0.828108	3.8492	1.44545e-07	4.16636e-06	283	296	316	178	173	160
CG31248	-2.06148	0.284356	1.50237e-07	4.32136e-06	27	34	26	13	5	3
CG17032	0.577526	7.8096	1.54834e-07	4.44428e-06	2990	2882	2930	4781	4754	3833
CG15611	-0.704424	5.86916	1.64356e-07	4.70776e-06	1087	1218	1231	658	805	732
CG11253	0.845309	3.50384	1.77822e-07	5.0829e-06	130	140	122	242	248	225
Sry-alpha	0.779356	3.72043	1.81332e-07	5.17249e-06	159	158	153	274	292	253
CG4115	-0.834456	4.02444	1.83111e-07	5.2124e-06	322	365	325	204	211	163
CG9170	-0.627048	6.14638	1.83777e-07	5.22056e-06	1505	1342	1353	971	1025	774
rgr	-0.9968	3.20018	1.90116e-07	5.38949e-06	193	214	184	86	124	91
Cyp6a2	3.51905	-0.870245	1.95614e-07	5.53393e-06	0	3	0	17	12	10
CG10623	0.913886	3.53742	1.99192e-07	5.62358e-06	121	142	126	286	269	194
ZnT63C	-0.661108	5.85783	2.09943e-07	5.91497e-06	1271	1037	1164	835	751	645
CG10359	0.633984	7.41978	2.13049e-07	5.99022e-06	2422	1888	2259	3818	3654	2899
CG13650	-1.51776	1.36106	2.25838e-07	6.33684e-06	79	51	48	22	24	17
CG42806	-0.612436	6.67932	2.27811e-07	6.37918e-06	1811	2045	2201	1292	1526	1206
CG8026	-0.607794	6.11564	2.31506e-07	6.46946e-06	1329	1357	1404	963	1011	760
CG12896	1.19228	2.57352	2.34508e-07	6.54006e-06	59	58	56	162	156	88
CG4666	-2.40009	-0.163647	2.36672e-07	6.58705e-06	26	15	23	4	5	3
CG30424	-1.84453	0.505994	2.37523e-07	6.59739e-06	29	28	43	10	11	7
Cyp4p3	6.4811	-1.10424	2.51782e-07	6.97933e-06	0	0	0	19	12	3
bmm	-1.70931	1.28432	2.628e-07	7.2701e-06	77	48	49	28	14	12
CG17104	-0.776841	5.13607	2.69185e-07	7.43178e-06	598	815	750	415	453	412
CG8642	-2.55795	-0.393142	3.25858e-07	8.97841e-06	15	21	18	3	3	3
Rep	-0.608174	5.72199	3.36568e-07	9.25494e-06	1049	949	1117	714	735	624
E(spl)mdelta-HLH	0.73962	4.94029	3.4229e-07	9.39352e-06	390	326	406	651	746	512
Parp	-0.643984	7.52116	3.53343e-07	9.67752e-06	3333	3437	4197	2255	2469	2361
Faa	1.13072	2.29703	3.54503e-07	9.68999e-06	54	38	55	96	123	107
His1:CG33810	-1.15898	1.9969	3.57363e-07	9.74877e-06	72	93	97	41	43	35
CG3008	-0.569502	6.49492	3.5817e-07	9.75145e-06	1722	1689	1857	1253	1281	1071
CG6362	1.68274	0.787269	3.66145e-07	9.94887e-06	14	16	7	42	35	44
chinmo	-1.56679	4.46454	3.83731e-07	1.04062e-05	370	616	621	109	172	257
CG9436	-0.855437	5.10601	3.88347e-07	1.05106e-05	743	854	559	415	433	366
CG42540	2.85115	-0.451765	4.44498e-07	1.20067e-05	3	1	3	12	17	24
CG42259	0.88982	3.70095	4.5343e-07	1.2202e-05	155	160	126	268	275	284
CG8083	2.10229	0.077689	4.53505e-07	1.2202e-05	9	5	3	26	21	28
al	0.740949	5.87899	4.55581e-07	1.2234e-05	866	685	598	1287	1321	1050
CG3339	4.60696	-1.07294	4.58978e-07	1.23012e-05	0	0	1	14	16	4
Rhp	0.587657	6.91028	4.75185e-07	1.27107e-05	1719	1386	1597	2521	2617	2048
Tom70	0.549902	6.65016	4.88498e-07	1.30415e-05	1331	1314	1338	2005	2175	1748
CG16824	1.62481	0.671408	4.9056e-07	1.30711e-05	9	13	13	32	39	39
CG10205	-2.7748	-0.375359	4.95371e-07	1.31738e-05	27	12	17	5	2	1
CG9689	-0.844794	6.6897	5.00392e-07	1.32816e-05	2039	2052	2396	1691	1158	851
CG31810	1.82809	0.472535	5.40112e-07	1.43083e-05	11	3	13	30	37	31
CG15353	1.57745	5.18823	5.42606e-07	1.43467e-05	186	476	224	610	1022	1041
CG33056	-0.688621	4.7811	5.51199e-07	1.4546e-05	521	556	576	355	343	340
CG31769	-3.87242	-1.03783	5.78368e-07	1.52337e-05	7	11	16	1	0	1
Kebab	0.665031	4.70427	6.0814e-07	1.59872e-05	317	318	347	536	553	490
Cap-D3	0.611107	5.49628	6.10244e-07	1.60119e-05	585	558	600	905	936	856
CG31323	-1.54628	0.839013	6.12684e-07	1.60453e-05	36	41	45	11	14	17
Cyp310a1	0.98236	7.44568	6.26353e-07	1.63721e-05	1695	2176	1847	2663	4161	4511
CG3726	-0.906771	3.87897	6.37699e-07	1.66371e-05	366	297	268	191	168	146
CG10924	1.30468	2.63799	6.76255e-07	1.76095e-05	34	59	79	133	164	134
CG32625	-2.49748	0.49982	7.02745e-07	1.82647e-05	18	52	38	2	8	9
CG8630	1.64266	1.94871	7.12453e-07	1.84821e-05	25	27	37	58	99	121
CG34417	-0.597289	8.86029	7.45279e-07	1.92833e-05	10156	8117	9120	7051	5791	5524
piwi	-1.01061	3.55347	7.46143e-07	1.92833e-05	216	249	296	105	133	142
CG12950	-2.64661	-0.473242	7.64499e-07	1.97206e-05	15	21	15	3	5	0
CG12038	1.65954	1.33846	7.93702e-07	2.04356e-05	21	18	17	85	66	32
CG11966	-2.72915	-0.554712	7.99056e-07	2.04967e-05	15	19	14	1	1	5
modSP	0.57524	6.93317	7.97857e-07	2.04967e-05	1735	1547	1514	2644	2609	2029
CG32138	-0.591273	6.92812	8.00878e-07	2.05052e-05	2573	2353	2225	1825	1558	1440
rpr	-0.903033	4.94999	8.46055e-07	2.16216e-05	505	713	745	312	358	387
Ir40a	3.40745	-0.952746	9.04553e-07	2.30737e-05	0	1	2	9	17	10
CG18522	-1.73465	1.08533	9.55821e-07	2.43363e-05	30	60	61	21	14	11
egr	-0.911732	3.96673	9.85237e-07	2.50389e-05	340	289	364	228	175	135
yellow-h	-1.62457	1.17858	1.0186e-06	2.58389e-05	35	51	73	15	21	16
Hn	1.36308	1.21347	1.02686e-06	2.60006e-05	24	13	23	60	49	48
path	-1.148	8.24548	1.15106e-06	2.90919e-05	4541	5423	10602	3772	3036	2596
CG15545	-1.26154	1.87369	1.1767e-06	2.96455e-05	103	77	65	42	36	26
CG42598	1.06601	2.59338	1.17728e-06	2.96455e-05	59	52	76	165	121	112
CG42326	2.61588	1.77971	1.19508e-06	3.00387e-05	2	24	19	53	135	94
CG13722	-2.23028	-0.0993567	1.22883e-06	3.08305e-05	29	17	20	8	3	3
Cct1	-0.603578	5.85335	1.24042e-06	3.10648e-05	1237	1091	1076	816	758	699
babos	-0.60772	7.21183	1.24541e-06	3.10915e-05	2926	2797	3032	2240	2152	1481
tadr	-4.38394	-1.26489	1.24601e-06	3.10915e-05	6	11	11	0	0	1
CG18278	-1.72602	1.49978	1.28506e-06	3.19584e-05	98	48	58	29	24	10
Sulf1	-0.606361	7.61912	1.2854e-06	3.19584e-05	4182	3316	4124	2960	2599	2199
nyo	0.614535	7.05035	1.3187e-06	3.2727e-05	1956	1417	1754	2888	2725	2352
viaf	-0.604769	6.3218	1.40924e-06	3.49112e-05	1613	1680	1415	1121	1146	890
CG13907	1.42885	0.984794	1.42642e-06	3.52732e-05	14	18	17	48	38	48
CG13847	2.51203	-0.536849	1.4386e-06	3.55104e-05	1	2	5	15	17	16
CG5335	-0.988108	3.05569	1.45513e-06	3.5854e-05	154	198	181	88	82	101
CG4404	-1.27883	1.75049	1.49282e-06	3.67018e-05	77	82	66	21	43	30
CG7778	1.66993	0.629427	1.49487e-06	3.67018e-05	8	12	13	48	35	25
AttA	-4.33402	-1.30125	1.53135e-06	3.74635e-05	8	8	11	1	0	0
CG15456	0.989254	2.4528	1.5309e-06	3.74635e-05	54	65	56	140	114	100
CG7985	0.673632	5.10181	1.56189e-06	3.81428e-05	484	422	383	722	781	592
CG6405	-2.02554	-0.0841032	1.57385e-06	3.83669e-05	20	24	21	5	9	2
yellow-c	-0.716699	5.25036	1.62534e-06	3.95519e-05	652	858	796	441	550	435
Claspin	0.605895	6.19727	1.63012e-06	3.95981e-05	948	888	1008	1326	1602	1447
tok	0.564865	8.75418	1.64521e-06	3.98941e-05	6532	5223	5282	9267	8602	7716
CG6739	-0.676114	4.66077	1.65789e-06	4.0131e-05	480	538	496	353	322	288
CG8129	1.13407	3.37017	1.68557e-06	4.07292e-05	107	92	114	167	314	216
na	-2.66909	-0.599228	1.69297e-06	4.08363e-05	19	14	13	3	0	4
CG10559	-1.20385	2.45702	1.72053e-06	4.14284e-05	95	158	113	52	65	45
dj-1beta	0.703195	6.06286	1.76687e-06	4.24698e-05	828	961	688	1410	1548	1161
CG13060	-1.5752	1.67558	1.85836e-06	4.45909e-05	84	97	44	24	32	21
mura	0.731155	5.98068	1.93149e-06	4.62648e-05	910	708	700	1593	1169	1148
CG34165	6.02395	-1.45279	1.98212e-06	4.73951e-05	0	0	0	4	9	11
CG5687	1.6697	2.22656	2.07075e-06	4.94284e-05	46	23	37	176	111	61
Cyp311a1	-4.07269	-0.893941	2.16089e-06	5.14905e-05	4	20	15	0	1	1
rtet	-0.596279	5.88262	2.20271e-06	5.23963e-05	1235	1063	1172	891	795	650
CG6118	-1.46675	0.837662	2.21666e-06	5.25464e-05	37	48	35	18	15	11
CG6414	-1.63717	0.498221	2.21495e-06	5.25464e-05	35	32	29	13	6	12
arr	0.540737	8.53079	2.28568e-06	5.40891e-05	5489	4369	4891	7926	7173	6652
Ance-2	-3.00127	-0.73916	2.38832e-06	5.64211e-05	8	20	14	1	2	2
Cyp4d2	0.741739	4.56827	2.42466e-06	5.71813e-05	286	307	270	441	578	448
CG10927	0.888078	2.98372	2.43949e-06	5.74323e-05	80	92	95	156	202	145
CG13024	-0.881223	3.05385	2.44694e-06	5.75093e-05	193	171	155	94	93	98
CG9691	-0.852106	6.02442	2.48024e-06	5.81925e-05	1425	1507	1150	1017	787	522
CG16820	1.46213	2.79032	2.56442e-06	6.00652e-05	49	88	39	125	196	172
pst	-0.839041	3.08784	2.63135e-06	6.15279e-05	179	153	195	107	95	96
CG13739	-1.55823	0.744622	2.70698e-06	6.31889e-05	28	40	46	10	16	13
CG34139	2.4114	-0.47272	2.82216e-06	6.57659e-05	4	4	1	14	16	20
SP1173	-0.936784	8.00187	2.88624e-06	6.71455e-05	4231	6155	6069	2118	3100	3401
PICK1	-0.924275	2.42145	2.94128e-06	6.83103e-05	110	106	120	62	56	61
CG15628	-0.781842	5.88615	2.95001e-06	6.83974e-05	1459	933	1268	879	737	554
CG31051	-1.33453	1.71872	2.96067e-06	6.85291e-05	86	51	86	36	36	18
Alg10	0.542598	6.23091	2.96844e-06	6.85935e-05	974	955	1059	1446	1564	1398
CG41284	1.07341	2.4799	2.97432e-06	6.8614e-05	57	44	71	153	113	102
CG16863	0.983402	2.69282	3.1139e-06	7.17135e-05	87	67	54	148	151	120
Gdh	-0.588045	8.98828	3.12067e-06	7.17493e-05	9095	11440	9231	6891	6692	6501
Cpr51A	-0.675328	5.18574	3.13988e-06	7.20704e-05	721	827	630	484	478	425
CG17036	-1.06203	2.01134	3.15055e-06	7.21948e-05	89	89	81	54	37	35
Lsp1alpha	-1.91055	0.644831	3.1807e-06	7.27646e-05	48	32	32	3	18	9
CG43394	-0.619164	4.95527	3.27559e-06	7.48109e-05	619	608	604	428	387	392
CG9514	-2.85289	-0.646191	3.28468e-06	7.48939e-05	22	8	15	2	3	1
CG43107	-2.53199	-0.177905	3.47377e-06	7.90744e-05	16	34	14	2	6	3
Tie	0.723043	5.29015	3.5905e-06	8.15964e-05	471	494	474	667	853	873
CG8213	-1.51964	0.790365	3.60927e-06	8.18876e-05	41	44	32	13	10	18
Tsf3	-0.922006	3.65899	3.61546e-06	8.18929e-05	263	284	254	122	135	168
CG31055	-0.853742	4.48615	3.65402e-06	8.26301e-05	488	352	569	304	250	235
PGRP-SB1	-3.64936	-1.197	3.76609e-06	8.50245e-05	8	9	12	2	0	0
CG5217	-1.72446	0.645127	3.80278e-06	8.57121e-05	48	23	38	12	8	13
alphaPS5	0.782421	3.51064	3.85419e-06	8.67288e-05	142	142	121	227	246	233
lbm	-1.28021	1.2252	3.90833e-06	8.78032e-05	60	49	45	22	19	23
CG16718	-0.588581	5.62134	4.05238e-06	9.0891e-05	1024	836	1030	707	643	597
ple	-1.79909	0.555005	4.08549e-06	9.14843e-05	34	27	42	18	9	3
alpha-Est3	0.731978	3.84143	4.17943e-06	9.34358e-05	180	179	163	313	310	259
CG6115	-0.521856	6.94376	4.31538e-06	9.63184e-05	2221	2279	2599	1821	1765	1441
CG8086	-1.64946	1.39485	4.32793e-06	9.64419e-05	52	86	48	23	29	9
Nc73EF	-0.542856	7.44177	4.46341e-06	9.93001e-05	3642	3342	3089	2546	2325	2149
CG13822	-4.22517	-1.37526	4.5105e-06	0.000100186	7	8	10	0	1	0
CG33775	-4.22512	-1.37519	4.52777e-06	0.000100407	10	7	8	1	0	0
CG32241	1.94503	0.0351081	4.74746e-06	0.000105109	4	5	9	17	27	27
CG42662	-1.25864	2.50103	4.84161e-06	0.000107021	111	136	136	36	52	72
CG4872	-0.60586	4.84492	4.98586e-06	0.000110033	595	546	549	406	395	328
CG13062	-4.22546	-1.37514	5.03789e-06	0.000111003	6	9	10	1	0	0
mGluRA	-2.10398	-0.0986856	5.0477e-06	0.000111041	30	14	21	4	5	6
CG1368	1.27806	1.4832	5.06772e-06	0.000111304	35	26	15	66	66	56
CG32066	-0.555481	5.49766	5.18325e-06	0.000113659	897	851	876	606	652	554
Cpr11A	-2.75676	0.879316	5.32301e-06	0.000116538	17	70	60	2	15	5
alphaPS4	-1.902	0.785788	5.45399e-06	0.000119216	37	49	38	21	11	2
Ect4	-0.518424	6.73063	5.54476e-06	0.000121008	2182	1870	2064	1560	1388	1374
CG13041	-1.55542	2.98653	5.63648e-06	0.00012262	250	228	90	74	72	52
CG6232	-1.32796	1.18485	5.63579e-06	0.00012262	64	45	42	19	26	16
Dgp-1	-0.882703	6.28155	5.73108e-06	0.000124481	1041	1875	2011	952	961	803
Hex-C	2.08274	-0.266576	5.86667e-06	0.000127025	8	2	3	20	18	19
shf	0.528375	7.28464	5.86128e-06	0.000127025	2216	2103	1917	3153	3340	2663
CAH2	-1.26091	2.47031	6.32733e-06	0.000136784	147	101	127	81	47	32
cp309	-0.503608	7.10507	6.38163e-06	0.000137741	2613	2441	2846	2038	1926	1690
E(spl)m3-HLH	0.553896	5.97774	6.43016e-06	0.000138571	822	850	820	1179	1343	1186
RhoL	-0.706192	4.26538	6.51732e-06	0.00014023	363	383	414	229	286	208
Zw	-0.611513	5.34399	6.54335e-06	0.00014057	799	836	758	617	541	439
CG42575	-0.807559	6.31433	7.14593e-06	0.000153275	1269	1742	1939	783	991	1067
CG15528	-1.53922	0.58926	7.34968e-06	0.000157205	29	42	30	13	9	13
CG17018	0.941104	2.48177	7.35203e-06	0.000157205	63	50	70	141	123	94
CG16798	0.976807	2.38772	7.6229e-06	0.000162744	50	65	53	101	138	98
Ude	-1.57609	3.36255	7.69055e-06	0.000163934	139	322	284	56	79	114
fd64A	5.93505	-1.49698	7.72681e-06	0.000164452	0	0	0	7	13	3
Porin2	-2.3276	-0.556293	7.91267e-06	0.000168147	12	17	17	3	3	3
CG11134	0.622571	4.73923	8.18359e-06	0.000173636	337	364	322	550	591	463
tor	-1.92548	0.558654	8.32602e-06	0.000176386	3202	2557	2887	3395	2853	2607
CG12206	0.52794	6.01097	8.64575e-06	0.000182878	884	856	838	1246	1350	1175
CG34054	3.1959	-1.10057	9.17137e-06	0.000193698	1	2	0	7	14	10
CG9948	0.659526	4.52594	9.32957e-06	0.000196737	262	272	336	487	503	406
Buffy	-1.31392	1.13335	9.36715e-06	0.000197227	34	55	56	21	20	18
salr	0.510046	8.18394	9.45611e-06	0.000198795	4330	3644	3761	5938	5931	5100
ana	0.984975	6.17396	9.56739e-06	0.000200828	1062	568	741	2170	1601	1043
CG42867	-4.1661	-1.41397	9.82523e-06	0.000205926	10	5	9	0	1	0
CG33993	0.582273	4.92029	1.00131e-05	0.000209543	413	391	377	646	640	514
CG32582	-1.20015	1.18431	1.08051e-05	0.000225775	53	50	44	25	25	15
tun	0.501575	6.27918	1.1434e-05	0.000238553	1055	994	1093	1569	1518	1419
tow	-1.42647	0.812994	1.14617e-05	0.000238767	28	46	43	17	14	13
CG34349	-0.551239	6.49631	1.15042e-05	0.000239291	1692	1605	1953	1174	1213	1227
l(2)41Ab	0.838846	2.58331	1.16723e-05	0.000242421	64	61	81	129	132	113
yellow-e	0.836692	3.55419	1.17621e-05	0.000243917	118	143	147	207	296	236
CG5590	0.534536	6.64006	1.18229e-05	0.00024481	1378	1402	1195	2127	2117	1631
GABA-B-R2	0.678655	4.19974	1.23461e-05	0.000254874	236	237	213	360	392	361
mnd	-0.83243	6.58432	1.23276e-05	0.000254874	1550	1675	2804	1383	1129	927
CG32572	-0.865328	3.03128	1.29108e-05	0.000266134	145	182	182	89	91	102
bnb	0.755934	8.91447	1.30174e-05	0.000267928	5640	7139	4710	8273	10785	10786
CG30059	-1.49499	1.52048	1.33246e-05	0.000273842	98	46	55	31	27	14
Tsp42Ea	0.681696	7.67749	1.34217e-05	0.000275426	2269	2828	2581	3333	4806	4306
ImpL1	-1.9208	-0.229925	1.36167e-05	0.000279011	19	19	19	5	5	5
CG33054	-0.669303	4.62272	1.40166e-05	0.000286351	452	497	524	279	338	319
CG6752	-0.652769	4.86869	1.3996e-05	0.000286351	645	485	613	356	395	369
CG10262	1.32095	0.991978	1.43451e-05	0.000292628	13	21	18	35	50	47
CG2781	-1.33753	0.901995	1.44246e-05	0.000292945	36	37	50	12	19	18
CG44006	-2.10936	0.399135	1.44104e-05	0.000292945	26	16	54	7	6	9
Def	2.12806	-0.434204	1.44092e-05	0.000292945	5	3	3	12	21	17
CG15529	-1.16058	1.80048	1.46823e-05	0.000297739	84	59	85	45	39	20
CG10463	-0.548375	5.26888	1.5053e-05	0.000304807	724	741	769	586	542	428
CG8366	0.594047	5.10671	1.52559e-05	0.00030846	438	409	493	708	797	556
cer	-0.611408	4.9663	1.57457e-05	0.000317896	563	597	683	377	450	394
kn	0.677862	5.10621	1.59445e-05	0.000321438	522	332	440	725	754	621
Cyp4d14	0.71276	3.55804	1.61079e-05	0.000324257	138	144	150	219	262	236
RpII140	-0.4923	8.47051	1.62315e-05	0.000326268	6883	6057	7367	5012	5147	4471
CG10232	-1.58908	0.236156	1.67108e-05	0.000335356	26	23	29	7	9	10
CG31808	-1.43898	0.55742	1.67324e-05	0.000335356	32	26	39	12	12	12
Dhc36C	-1.80642	0.222525	1.69605e-05	0.000339431	31	23	26	15	3	5
Art9	1.33074	0.834555	1.71177e-05	0.00034208	21	13	12	46	36	36
CG14314	-0.756845	3.83505	1.73741e-05	0.00034624	332	274	264	187	199	139
CG1607	-0.462203	8.9559	1.73762e-05	0.00034624	9071	8740	10367	7534	6978	6234
CG32485	-1.06866	1.66113	1.74036e-05	0.000346285	74	59	69	28	31	38
CG6310	-0.646825	4.96501	1.75547e-05	0.000348785	511	677	669	437	423	347
onecut	-1.23303	1.12716	1.78773e-05	0.000354683	37	51	54	19	21	21
l(1)G0232	-0.477365	6.83152	1.82197e-05	0.000360955	2342	1988	2152	1646	1675	1407
skl	-3.49547	-1.30121	1.83036e-05	0.000362096	6	10	10	1	1	0
CG31785	1.3087	1.44668	1.85148e-05	0.000365747	31	14	28	81	61	43
CG11289	-1.83524	-0.214432	1.89474e-05	0.000373756	18	18	21	8	6	2
CG5987	0.678844	3.48725	1.97469e-05	0.00038897	127	144	146	234	238	206
CG8800	2.06684	-0.375474	1.99972e-05	0.000393336	1	4	7	19	14	19
CG9444	1.01992	1.64596	2.03953e-05	0.000400594	34	29	34	78	62	60
CG10344	-1.14454	2.46644	2.05087e-05	0.000402245	106	125	134	40	51	74
kek1	0.513013	7.77579	2.08343e-05	0.00040805	3152	2494	3200	4477	4346	3956
GstE3	-1.12283	1.47775	2.08989e-05	0.000408624	51	63	65	21	32	30
Sgs1	-2.39621	-0.645571	2.09231e-05	0.000408624	18	13	12	0	6	2
CG8801	0.478911	9.5222	2.09831e-05	0.000409215	9763	10708	9542	13831	14887	13679
in	0.552643	5.99609	2.10892e-05	0.000410375	885	805	837	1475	1169	1120
Spn42Da	-0.490444	6.30224	2.11022e-05	0.000410375	1537	1527	1437	1158	1115	982
mthl3	0.49136	8.40929	2.12878e-05	0.000413398	4322	4687	4811	6422	6931	6321
CG13775	-0.824293	3.00674	2.34682e-05	0.000455039	170	171	154	91	86	105
CG41378	0.529798	5.30023	2.34982e-05	0.000455039	515	487	572	747	824	730
RhoGDI	-0.507577	8.68031	2.35694e-05	0.000455774	6868	7740	8969	5384	6098	5310
CG10505	5.60544	-1.71708	2.42866e-05	0.000468985	0	0	0	5	7	6
Hsp67Bb	1.98546	0.139865	2.46737e-05	0.000475791	2	5	12	38	24	16
CG32486	0.482552	6.15908	2.53991e-05	0.000489092	961	993	956	1437	1434	1258
CG2650	-2.18429	-0.534558	2.56011e-05	0.000492293	16	19	11	3	4	3
His1:CG33834	-1.12381	1.47625	2.72513e-05	0.000523293	45	59	75	27	29	27
CG12105	-2.07199	-0.392213	2.79703e-05	0.00053635	16	21	14	1	5	6
CG31547	1.20084	2.9332	2.80437e-05	0.000537009	114	50	59	149	202	168
CG10581	-0.85383	2.3606	2.82089e-05	0.000539422	112	108	96	60	57	60
Dll	0.657485	5.69177	2.89012e-05	0.000551892	806	631	518	1139	1082	918
Cas	-0.463171	8.67041	2.9031e-05	0.000552835	7381	7023	8729	5758	5890	5334
CG33510	-2.53885	-0.868715	2.8998e-05	0.000552835	12	12	12	1	5	0
CG14275	-0.953112	3.13714	2.95199e-05	0.000561368	175	224	160	76	120	97
sro	1.26132	0.873069	2.98926e-05	0.000567671	21	12	16	48	40	32
Sod3	0.464359	7.49703	2.99497e-05	0.000567969	2540	2298	2590	3768	3658	2994
Nrt	0.751389	6.62079	3.15504e-05	0.000597503	1468	914	1209	2697	1885	1581
CHES-1-like	0.615037	6.64176	3.17974e-05	0.000601352	1250	1532	1060	1924	2089	1959
Ipk1	-0.525184	5.17754	3.22875e-05	0.000609782	729	685	668	537	513	422
CG10365	-1.34747	2.42997	3.30816e-05	0.000623921	65	131	175	49	58	41
BoYb	1.63199	0.340386	3.38202e-05	0.000636978	7	12	8	20	41	25
CG3328	0.68872	7.03584	3.42721e-05	0.000644607	2051	1643	1207	2991	2665	2386
CG42324	-1.40885	2.56277	3.44458e-05	0.000646988	161	67	186	66	44	47
ox	-0.627064	5.7857	3.46524e-05	0.000649981	1072	1257	932	838	726	593
Sb	0.94986	5.82224	3.47709e-05	0.000651315	897	456	533	1636	1229	866
ey	-1.9605	-0.112998	3.53242e-05	0.000660779	29	16	18	5	2	9
CG13083	1.79686	-0.133222	3.58929e-05	0.000670505	7	6	4	27	17	17
alpha-Man-I	-0.458496	6.65989	3.62081e-05	0.000675475	2011	1731	1983	1557	1418	1254
CG18213	-0.629682	5.48762	3.6572e-05	0.00068134	773	890	998	503	629	603
Rbp1	-0.503764	7.38915	3.70873e-05	0.000690005	2913	3442	3248	2180	2533	2159
CG42633	-2.26557	-0.600647	3.72525e-05	0.000692142	9	16	19	5	2	2
CG12182	0.56749	5.14475	3.76742e-05	0.000699032	426	441	524	697	814	587
GstD5	-2.49663	-0.894966	3.77562e-05	0.000699609	10	14	11	2	3	1
CG6287	0.809254	7.23327	3.80958e-05	0.000704951	2155	1359	1842	4358	3164	2101
CG3618	-0.602593	4.52942	3.85186e-05	0.000711818	422	447	487	289	348	270
foxo	0.550509	5.55703	3.86128e-05	0.000712601	668	528	671	994	888	883
CG5986	0.591797	4.70216	3.87422e-05	0.000713074	305	367	338	514	539	491
yellow-e2	0.511408	5.55028	3.87177e-05	0.000713074	624	582	681	882	997	847
CG13676	0.498039	8.41247	3.89893e-05	0.000716663	5081	4463	4265	7398	6622	5813
CG2641	-0.667982	4.26562	3.90504e-05	0.000716829	376	356	417	230	241	258
cib	-0.523167	10.1423	3.96746e-05	0.000727315	20113	19527	25688	17869	15925	12486
CG18336	1.29986	1.30912	4.06309e-05	0.000743503	18	32	16	51	74	42
CG5665	-1.04825	1.30209	4.06658e-05	0.000743503	48	52	55	25	30	21
CG17738	-1.34064	0.777604	4.08395e-05	0.000745687	32	45	35	21	16	8
His2B:CG33888	-1.0543	1.34476	4.11245e-05	0.000749895	47	59	54	29	24	25
brk	0.4552	6.76348	4.16201e-05	0.000757927	1579	1398	1503	2125	2091	2000
rt	-0.626006	5.16833	4.24197e-05	0.000771466	813	619	698	569	429	404
CG1698	0.661192	3.99258	4.41025e-05	0.00080101	210	204	184	361	336	267
Inos	-0.565097	7.02785	4.49437e-05	0.000815212	2896	2535	2172	2061	1733	1448
CG15828	1.50034	0.384995	4.52459e-05	0.000819612	8	9	13	40	24	23
CG4860	-0.626118	5.11605	4.58789e-05	0.000829985	685	765	598	403	511	433
CG10625	-0.826776	8.18179	4.62887e-05	0.000836298	6697	4552	6971	4997	3077	2425
CG13955	-4.04039	-1.4944	4.74965e-05	0.000856994	9	3	10	1	0	0
CG12951	5.52018	-1.76667	4.83266e-05	0.000869793	0	0	0	8	5	4
Sc2	0.468945	7.39779	4.83324e-05	0.000869793	2248	2332	2334	3396	3684	2680
Snap24	-0.499354	5.48519	4.85874e-05	0.000873239	876	839	845	659	659	525
CG32809	0.498063	5.25755	4.87904e-05	0.000875742	527	513	506	766	752	696
asparagine-synthetase	-0.89411	5.07665	4.91924e-05	0.000881807	456	687	1002	432	419	322
Adgf-C	3.44341	-1.30396	5.0516e-05	0.000904354	1	0	1	6	15	5
CG5245	0.940972	1.89063	5.07091e-05	0.00090663	48	34	38	72	89	73
CG1927	0.471225	7.34157	5.16359e-05	0.000922002	2035	2138	2478	3232	3413	2725
CG9747	0.590785	5.08727	5.23963e-05	0.000934367	481	401	441	765	758	513
CG30403	0.650718	4.73086	5.25691e-05	0.000936233	285	356	365	481	570	545
CG14693	1.1987	0.908588	5.34197e-05	0.000950152	17	14	21	40	37	44
CG4984	0.762762	3.14173	5.36166e-05	0.000952423	102	123	90	175	195	173
Gprk1	-0.500649	7.57614	5.41702e-05	0.000961013	3433	3387	4127	2500	2689	2619
BI-1	0.455654	7.11026	5.49332e-05	0.000973294	1893	1821	1984	2539	2940	2446
CG31475	0.623983	5.18098	5.52595e-05	0.000977816	560	440	391	710	744	716
sprt	0.612318	4.06769	5.55187e-05	0.000981139	208	212	224	325	357	316
Sesn	1.18631	1.82614	5.57331e-05	0.000983663	43	31	28	55	106	75
mthl15	-1.17512	1.1137	5.59337e-05	0.000985939	56	37	46	22	17	23
form3	-0.5369	4.89799	5.67244e-05	0.000998596	573	566	581	420	389	391
CG5397	0.643636	3.74628	5.72421e-05	0.00100642	174	153	181	314	265	228
CG15080	0.649974	4.11416	5.83402e-05	0.00102442	222	232	200	343	348	348
Pect	-0.483384	5.86646	5.8539e-05	0.0010266	1064	1050	1210	806	867	738
CG32473	0.44428	7.8204	5.92997e-05	0.00103729	3278	2883	3209	4607	4500	3839
CG4497	0.526197	4.88046	5.92797e-05	0.00103729	387	388	401	568	600	548
CG30047	0.978529	1.94879	6.13138e-05	0.00107116	33	46	44	71	84	90
Ac13E	0.721899	3.59028	6.2545e-05	0.00109063	171	136	133	293	231	214
DmsR-1	5.51603	-1.76712	6.25867e-05	0.00109063	0	0	0	9	5	3
CG42675	-0.962848	3.30186	6.38981e-05	0.00111207	207	264	157	127	127	77
Syt12	1.06148	1.3375	6.42322e-05	0.00111647	26	21	29	53	68	41
CG34120	0.683917	4.59961	6.4989e-05	0.0011282	362	303	239	536	497	444
Hsepi	0.480221	5.73961	6.89784e-05	0.00119594	784	664	731	1103	1047	934
CG3349	2.171	-0.767651	6.92232e-05	0.0011976	3	2	3	15	14	9
S2P	0.484884	5.7212	6.9248e-05	0.0011976	715	640	794	1058	1081	912
CG7841	-0.668945	3.58144	6.93852e-05	0.00119846	216	219	278	169	153	133
CG13563	0.838966	2.56473	6.96448e-05	0.00120144	64	76	63	119	115	133
Mlc-c	-0.451351	8.13059	6.988e-05	0.00120399	4855	5392	5583	3975	4238	3545
Try29F	0.957475	1.53351	7.11769e-05	0.0012248	32	29	31	69	62	51
CG17600	0.655384	4.72381	7.16574e-05	0.00123152	371	363	263	532	581	485
CG43324	-5.54804	-1.76477	7.3568e-05	0.00126278	3	9	5	0	0	0
gl	-1.23866	0.69165	7.58588e-05	0.00130048	2081	1698	1914	2019	1719	1569
mthl5	-0.443511	7.06055	7.85803e-05	0.00134546	2584	2276	2668	2025	1976	1624
CG13248	-1.31525	0.505771	8.03414e-05	0.0013739	28	30	33	18	11	8
Nplp3	-5.45866	-1.81589	8.32397e-05	0.00142169	7	4	5	0	0	0
CG10730	0.779735	2.44027	8.3838e-05	0.00143013	62	58	71	104	128	101
Sp212	-1.23315	0.769242	8.5323e-05	0.00145366	31	39	39	23	13	11
nAcRbeta-96A	-1.16938	0.835667	8.63326e-05	0.00146904	37	38	38	17	23	11
CG4558	0.461391	5.75342	8.72584e-05	0.00148296	705	751	759	1056	1102	939
CG10184	-1.43043	0.913268	8.90497e-05	0.00151154	44	54	28	17	10	20
dsx-c73A	-0.749192	2.47844	8.99411e-05	0.00152478	109	103	123	67	73	62
CG2678	-1.16305	0.961212	9.02886e-05	0.00152879	44	31	49	22	19	15
CG13855	1.19884	0.802302	9.05424e-05	0.00153101	16	13	19	32	42	38
Thor	-0.884584	4.12459	9.06425e-05	0.00153101	248	433	418	194	196	211
CG3831	-0.877038	2.86354	9.09434e-05	0.00153421	163	138	153	115	65	71
CG6259	-0.451668	6.40172	9.21503e-05	0.00154887	1483	1589	1701	1219	1255	1069
DIP1	0.429351	9.70694	9.19484e-05	0.00154887	11563	10882	12427	17485	17380	12995
eyg	0.599875	5.36234	9.20793e-05	0.00154887	600	561	431	849	920	693
CG1887	2.67734	-1.16459	9.31771e-05	0.00156421	3	1	0	10	9	9
CG30281	-2.28768	-0.716697	9.33398e-05	0.00156504	16	7	17	5	1	2
CG42266	1.45294	0.169977	9.46361e-05	0.00158484	7	12	7	25	26	22
l(2)35Bg	-0.439166	6.6521	9.56401e-05	0.0015997	1830	1936	1888	1383	1567	1286
CG42663	0.497024	5.19109	9.63413e-05	0.00160947	538	473	466	743	751	625
CG15674	0.613656	4.38058	9.87958e-05	0.00164847	226	269	306	437	448	361
Dscam	0.58171	6.5235	9.96128e-05	0.00166009	1460	1024	1119	2174	1718	1587
CG13409	-1.22442	0.708093	0.000102581	0.00170749	38	31	35	10	22	13
GalNAc-T1	0.408629	6.68862	0.000103163	0.00171302	1435	1428	1468	1995	2043	1795
Lsd-2	0.408318	9.02927	0.000103052	0.00171302	7496	7372	7083	9815	10733	9036
Dro	-3.44706	-1.33703	0.000103336	0.00171382	6	14	5	2	0	0
TwdlB	2.88863	-1.30265	0.000103719	0.00171812	1	1	1	8	10	7
kay	-0.452292	6.40065	0.000110314	0.00182517	1665	1500	1606	1307	1159	1072
brn	0.77507	3.09493	0.000110638	0.00182832	112	114	77	190	189	150
Rpt6R	-2.50412	-0.895083	0.000111347	0.00183782	15	14	6	3	3	0
Mrp4	-1.16566	1.21173	0.000114406	0.00188606	36	52	61	27	17	23
os	-0.659103	3.66813	0.000115026	0.00189401	250	237	268	138	179	166
Proc-R	2.46091	-0.0999617	0.000115411	0.00189806	1	3	8	8	34	26
bocksbeutel	-0.470996	5.46818	0.000115564	0.00189831	835	813	862	613	675	551
CG8620	-4.0438	-1.49276	0.000116475	0.001911	3	13	6	0	0	1
Pde1c	1.83414	0.218344	0.000118318	0.00193882	14	3	5	41	21	19
Pvf3	-1.0996	2.10347	0.000118453	0.00193882	104	61	115	49	33	49
CG7781	0.96126	1.49005	0.000119036	0.00194605	26	32	31	66	53	57
ewg	0.437994	7.15435	0.000120249	0.00196355	2031	1775	2115	2714	2833	2571
Hexo1	0.46976	7.83546	0.000122134	0.00199196	3419	2949	2998	5070	4522	3629
CG14692	-3.26724	-1.06834	0.000122748	0.0019996	19	3	10	0	1	2
esn	0.497015	6.8904	0.000123717	0.00201301	1880	1525	1401	2509	2403	1992
tam	0.504511	5.0678	0.000124836	0.0020288	487	446	418	697	686	567
CG42272	0.508946	4.82721	0.000125672	0.00203999	404	371	366	565	585	499
CG31086	-2.93497	-1.30122	0.000125931	0.00204177	10	9	6	2	1	0
Ir100a	-3.25414	-1.45299	0.00012637	0.00204648	9	6	7	1	0	1
Rab6	-0.451197	6.7093	0.000129258	0.00209079	1926	1833	2154	1713	1460	1227
Arpc1	-0.458374	6.89465	0.000132908	0.00214731	2373	2352	1997	1775	1764	1444
CG6793	1.7007	-0.19962	0.000133792	0.00215905	8	2	7	24	18	15
CG14598	0.580809	4.91385	0.000135433	0.00218297	402	332	445	669	665	464
EndoGI	-0.447354	6.90804	0.000138665	0.00223244	2016	2345	2410	1679	1763	1591
Tm1	-0.426532	7.38731	0.000140369	0.00225723	3157	3087	3141	2628	2334	2129
CG12991	-0.44973	5.77476	0.000140725	0.00226031	1033	946	1110	787	805	701
Su(P)	-0.51724	5.24819	0.000144241	0.00231409	758	720	704	540	611	406
Xrp1	-0.400361	8.92628	0.000146998	0.00235556	9423	8986	8653	7435	7031	6351
IP3K2	0.538476	5.31865	0.00014904	0.0023855	624	443	522	859	825	663
CG3625	-0.493811	6.30823	0.00015177	0.00242637	1412	1489	1628	981	1301	984
CG9396	-2.67106	-1.19697	0.000153722	0.00245473	8	11	8	2	2	0
CG6749	-0.811928	2.64669	0.000153992	0.00245619	136	97	151	85	77	60
B4	0.444677	6.84758	0.00015539	0.00247562	1743	1429	1599	2202	2213	2149
CG31145	-1.67374	-0.248887	0.000158605	0.00252392	18	17	19	11	4	2
Snap25	-1.00965	1.50642	0.000158857	0.00252501	46	70	62	34	34	22
CG10863	-0.886228	3.84417	0.000159197	0.00252748	246	363	294	121	198	175
Rbp9	-1.18392	0.654749	0.000166386	0.00263857	36	34	29	13	16	15
Corin	-1.46674	0.106666	0.000169397	0.00268323	27	20	22	6	8	11
rho-7	0.442261	6.11419	0.000169861	0.00268749	889	995	983	1366	1372	1216
rempA	-0.646749	3.3458	0.000172026	0.00271861	194	200	206	127	123	137
Spn47C	0.588376	4.36054	0.000174815	0.00275951	271	234	294	374	446	395
capu	0.424519	6.81578	0.000175763	0.00277129	1728	1460	1514	2252	2255	1904
Mnn1	0.469977	7.24774	0.000176415	0.00277839	2311	1781	2146	3314	2846	2605
CG9289	-3.83325	-1.62369	0.000178324	0.00280523	7	3	9	1	0	0
beta3GalTII	0.586649	3.59226	0.000181429	0.00285081	151	148	168	244	235	231
CG4061	0.440379	6.28046	0.000182343	0.00286191	1110	1079	1031	1455	1646	1339
CG30154	3.4803	-1.26951	0.000185088	0.00290168	0	1	1	16	9	2
Awh	0.821639	2.05126	0.000186394	0.00291551	51	43	48	86	103	67
CG9674	-0.448805	7.91855	0.000186277	0.00291551	4602	4801	4236	3487	3329	3305
RpS5b	-1.70404	-0.020494	0.000187436	0.00292848	18	32	15	4	8	8
CG3280	-0.585663	3.57693	0.000191547	0.00298254	216	232	246	174	161	135
l(3)neo38	0.486851	6.82192	0.000191135	0.00298254	1732	1526	1342	2466	2061	2017
Prx2540-1	0.834392	2.73361	0.000191336	0.00298254	83	72	74	165	163	91
CG42351	1.10041	1.32945	0.000194438	0.00302413	19	25	30	67	63	33
CG16719	0.839744	1.96937	0.000196368	0.00304725	52	37	44	79	80	82
CG34382	-1.08878	1.11275	0.00019625	0.00304725	50	52	34	22	26	17
BG4	-0.586526	3.74573	0.000196964	0.00305214	263	255	263	199	161	167
Rbp1-like	0.417534	6.71784	0.000197127	0.00305214	1472	1373	1563	2200	2160	1638
CG32069	-0.568874	4.45181	0.000199426	0.00308426	379	443	450	320	317	237
ligatin	-0.439097	5.75616	0.000201154	0.0031075	962	1015	1060	773	827	676
CG15765	-0.92447	4.7364	0.000208051	0.00320687	796	391	517	416	290	212
CG33463	-3.75944	-1.66913	0.000208053	0.00320687	7	5	6	1	0	0
CG31174	1.32243	0.430284	0.000211607	0.00325799	15	11	8	23	38	26
CG16979	0.469545	5.85435	0.000216557	0.00333047	759	718	895	1238	1127	970
ACC	-0.464502	7.03383	0.000222031	0.00341084	2851	2274	2303	2051	1867	1560
Dbp80	-0.461359	8.00349	0.00022251	0.00341439	4270	4767	5513	3495	3700	3488
pigs	-0.629595	5.79384	0.000225799	0.00346099	1252	1107	927	608	723	806
Kr-h1	0.492494	7.04077	0.000227834	0.00348829	2039	1823	1477	2598	2703	2334
Dhap-at	-0.546986	4.12868	0.000229166	0.00350479	337	339	333	251	236	214
CG8852	-0.737305	3.04997	0.000231445	0.00353179	143	158	199	89	122	93
sick	-0.584061	6.02208	0.000231241	0.00353179	1539	1048	1225	1056	816	715
CG8891	-0.508233	5.63926	0.000233034	0.00355209	821	1050	983	676	782	586
CG2444	-1.56555	1.92726	0.00024545	0.0037372	113	33	125	40	34	19
Act5C	-0.382907	12.7692	0.000250284	0.00380659	127921	126396	132286	110389	104464	86771
CG16721	0.451719	6.08145	0.000251728	0.00381588	1012	848	935	1454	1320	1113
CG5381	-1.29237	1.78474	0.000251527	0.00381588	74	65	93	13	45	37
Fas2	-0.506486	7.91285	0.000251639	0.00381588	5048	4125	4671	4086	2955	2859
spz6	-0.908783	3.98422	0.000252658	0.00382576	392	277	335	271	152	124
Top3beta	0.541276	6.39118	0.00025388	0.00384004	1223	1231	877	1747	1788	1412
CG10877	-0.659215	4.16875	0.000263134	0.00397563	331	422	315	214	254	219
CG32547	-1.94625	-0.691816	0.000267246	0.00403334	11	15	13	5	2	3
proPO59	-0.879782	1.73831	0.0002678	0.00403727	70	72	62	48	39	26
Jon65Aiii	4.53195	-1.1049	0.000273324	0.00411602	0	1	0	4	27	2
Adk1	0.694541	2.93488	0.000276305	0.00415637	112	86	83	149	163	149
CG2145	-0.488912	5.49753	0.000277277	0.00416643	867	915	789	694	597	570
Fcp3C	0.819107	1.92688	0.000280369	0.00419998	38	45	47	88	85	61
glob1	-0.713315	3.80909	0.000279816	0.00419998	238	319	287	156	171	192
LanB1	0.38601	9.29655	0.000280426	0.00419998	9072	8160	9462	12665	11718	10953
CG31076	-1.12439	2.2167	0.000281448	0.00421069	64	129	111	39	43	58
CG17129	0.707603	3.69249	0.000283786	0.00424106	129	167	180	236	260	287
CG9004	-0.480782	5.05009	0.000284452	0.0042464	656	555	673	449	488	430
Ect3	-0.74843	5.53013	0.000286357	0.0042685	1251	720	860	742	591	393
Pcd	0.478205	5.81406	0.000286553	0.0042685	706	846	740	1099	1215	939
CG31898	-0.726795	2.90823	0.000290983	0.00432511	127	152	172	84	93	98
pic	-0.411858	8.39977	0.000290769	0.00432511	6110	5807	6965	4998	4962	4421
CG14410	1.53938	0.0728509	0.000294563	0.00437359	4	7	12	21	33	15
rst	0.504126	6.23501	0.000295237	0.00437887	1217	844	985	1602	1554	1238
Cpr67Fa1	1.96422	-0.178246	0.000297041	0.00440088	1	10	4	12	22	26
ome	0.486728	6.0356	0.000302484	0.00447669	914	820	936	1539	1185	1080
CG12003	0.968696	1.68751	0.000305071	0.00451012	32	39	31	71	89	45
CG10096	3.26505	-1.41585	0.000311713	0.00460337	0	2	0	14	5	4
olf413	0.412407	7.34243	0.000318269	0.00469515	2354	2023	2439	3339	3127	2738
CG42372	-0.530512	4.73979	0.000321125	0.0047322	475	522	541	328	423	330
CG30100	-0.530512	4.73979	0.000321804	0.00473713	475	522	541	328	423	330
CG5758	0.805772	7.43364	0.000328084	0.00482441	2515	1339	2321	5129	3453	2458
Skeletor	0.422502	6.6965	0.000329603	0.00484157	1448	1523	1355	2196	1877	1814
LanA	0.417314	9.77194	0.000332599	0.00488037	13624	10861	12168	17762	15960	15799
ems	0.475504	5.76235	0.0003347	0.00490596	849	676	692	1017	1182	933
CG11893	-2.34103	-0.194524	0.000335876	0.00491796	5	30	27	4	2	6
CG12065	-0.597654	4.97205	0.000337732	0.00493987	597	660	583	331	462	435
CG8180	0.661905	4.81224	0.000342548	0.00500499	412	388	257	544	597	556
CG9903	0.774558	1.94081	0.000347379	0.00507019	40	45	49	82	81	70
CG17470	-0.868217	1.5676	0.000353632	0.00515598	57	61	62	28	42	30
Mco1	1.32847	0.230171	0.000356462	0.00519173	10	9	10	30	30	15
Esyt2	-1.13363	5.43961	0.000364491	0.00530305	619	1272	1011	222	537	565
CG6084	-0.471029	7.75796	0.000369559	0.00537111	3374	4201	4728	3112	3293	2619
unc-45	-0.423396	6.5371	0.000373515	0.00542287	1726	1561	1919	1453	1330	1157
dac	0.538706	4.54726	0.000373969	0.00542374	359	277	292	499	462	408
CG5167	-0.5889	4.96302	0.000377208	0.00546495	639	702	480	412	457	365
CG15099	-0.546515	6.56466	0.0003809	0.00551263	2208	1469	1823	1540	1218	1070
CG6279	-3.68031	-1.7163	0.000385135	0.00556805	4	7	6	0	1	0
CG18231	-3.83493	-1.62357	0.000386497	0.00558187	2	6	11	0	1	0
CG17154	3.64657	-1.71638	0.000388694	0.00560772	1	0	0	5	5	7
CG13564	-1.94972	-0.692081	0.000391144	0.00563715	16	14	9	6	2	2
CG9449	-1.79872	-0.394803	0.000395985	0.00570095	22	8	19	4	6	4
rho-4	-0.391063	6.92955	0.000400096	0.00575411	2202	2332	2222	1843	1869	1530
Ets96B	-1.39489	1.87709	0.000401187	0.00576377	42	90	121	21	34	41
Tsp42Ei	0.853428	2.14571	0.000402445	0.0057758	58	34	58	108	96	72
CG14507	1.10375	0.8761	0.000406386	0.00582628	16	21	16	31	47	38
topi	-1.37413	0.0923753	0.00041219	0.00590334	25	23	19	6	11	9
Strn-Mlck	-0.5042	4.66696	0.000415102	0.00593885	537	433	482	365	346	326
CG42233	-0.492102	4.64566	0.000431547	0.00616772	487	455	483	323	372	331
obst-H	-5.26925	-1.92297	0.000439497	0.00627482	8	2	4	0	0	0
su(w[a])	0.405736	8.47487	0.000442094	0.00630535	5381	4934	4645	7022	7013	6097
RabX4	0.585747	3.21605	0.000447666	0.0063782	119	106	134	193	192	162
CG18586	-1.47657	-0.115794	0.000450311	0.00640925	13	22	23	7	10	4
Fas3	0.400686	9.04934	0.000454588	0.00646343	7698	7895	6711	10708	10006	9199
CG12822	0.420596	6.10915	0.00045724	0.00649441	938	1019	923	1293	1414	1208
CG12177	-1.01849	1.06964	0.000459999	0.00652012	52	32	46	27	21	17
pwn	0.449983	7.581	0.000459543	0.00652012	2852	2789	2258	3655	3836	3462
CG4995	-2.74667	-1.41299	0.000466325	0.00660298	7	8	7	1	0	2
CG2014	1.43189	0.0499993	0.000467899	0.00661846	8	8	8	27	14	25
CG5446	0.404678	6.6479	0.000473148	0.00668583	1295	1371	1554	1998	2075	1611
Ggt-1	-0.687883	2.56565	0.000478942	0.00676076	115	127	108	72	73	75
E5	0.677452	4.84336	0.000493307	0.00695638	413	412	247	592	656	503
CG43897	-1.03163	3.6849	0.000498076	0.00701644	216	352	268	80	165	166
zip	-0.466229	10.5855	0.000502534	0.00707199	32614	24771	29946	25654	19221	19208
Imp	-0.383641	7.71011	0.00051247	0.00720445	3829	3733	4034	2971	3189	2844
CG14424	5.14952	-1.97972	0.000518547	0.00728243	0	0	0	3	5	5
CG14057	-0.55222	4.62015	0.000531901	0.00745184	386	500	538	344	354	289
CG34398	0.501333	7.44721	0.000532765	0.00745184	2838	2162	2062	4010	3202	2954
GluRIIC	5.14582	-1.98021	0.00053123	0.00745184	0	0	0	3	6	4
wts	0.434072	6.48273	0.000532777	0.00745184	1385	1135	1198	1891	1626	1575
CG9572	-1.26522	0.334293	0.000537646	0.00751188	23	32	24	8	10	15
Cyp28d1	-3.75775	-1.66821	0.000538163	0.00751188	2	10	6	0	0	1
Hsp23	0.806519	10.3665	0.000541148	0.00754588	19113	11154	16863	39386	29942	15588
CG6015	0.378547	6.68742	0.000544305	0.00758222	1413	1419	1549	1898	2170	1718
Fs	0.436114	5.60466	0.000552981	0.00769528	744	596	680	1001	970	806
CG2023	-0.399376	6.40294	0.000554221	0.00770473	1610	1495	1599	1181	1272	1158
CycK	0.396529	6.40225	0.000559108	0.00776483	1151	1135	1284	1667	1727	1383
CG12880	-0.461578	7.68742	0.000570943	0.00791917	4193	3289	4217	3397	2990	2272
CG33181	-0.495445	5.05422	0.000571374	0.00791917	688	556	653	437	450	470
CG2201	-0.721002	3.46641	0.000575527	0.0079687	228	195	244	174	104	131
SelR	0.486721	4.77809	0.000576911	0.00797983	378	383	351	566	593	431
CG10650	-2.22371	-0.766864	0.000583798	0.00806698	15	5	18	3	5	0
psh	-1.29209	0.132429	0.000598565	0.00826272	24	24	20	10	10	8
CG13532	2.51917	-1.26531	0.000609844	0.00840155	0	4	0	6	9	10
CG9517	-1.55609	-0.318486	0.000609755	0.00840155	12	19	19	5	6	6
CG4030	0.418811	5.94244	0.000613223	0.00842277	826	891	851	1289	1143	1055
CG42340	0.822462	2.49707	0.000612653	0.00842277	83	54	58	150	103	98
lbk	0.432875	7.49252	0.000612245	0.00842277	2827	2127	2549	3871	3458	2961
CG9925	-1.15323	0.364891	0.000621837	0.00853258	25	28	26	16	13	7
Cht6	-0.52183	7.08514	0.00062617	0.00858347	2833	2368	2629	2418	1568	1560
nuf	-0.385049	7.36565	0.000629133	0.00861548	3022	2847	3271	2390	2420	2271
CG11151	-0.416631	6.02437	0.000629771	0.00861564	1172	1277	1182	946	933	879
Hex-A	-0.451503	6.11762	0.000630828	0.00862153	1428	1191	1301	1165	937	815
CG1637	0.43956	4.90467	0.00064771	0.00883468	401	403	435	574	601	529
CG5961	0.439867	4.95285	0.000647565	0.00883468	423	440	417	614	633	519
CG32803	0.454118	5.49592	0.000649162	0.00884571	553	591	716	917	923	749
CG12769	-1.03387	1.24419	0.000650742	0.00885847	48	55	45	14	32	27
CG7049	0.411917	5.27782	0.000655073	0.0089086	524	531	569	750	793	652
chp	0.53671	4.20972	0.000664553	0.00902859	215	245	274	368	404	311
CG8005	0.463312	4.70095	0.000667673	0.00906204	368	360	336	501	526	462
wrapper	-1.2492	0.579034	0.000669594	0.00907914	42	23	30	9	13	18
CG14946	-0.758597	4.09167	0.000670674	0.00908483	381	410	247	180	237	206
capt	-0.425584	8.08155	0.000672609	0.00910207	5416	5211	4541	4353	3974	3194
CG18547	-0.574432	5.37288	0.000681816	0.00921759	774	780	866	710	587	370
CG4390	-0.442388	7.28919	0.000687291	0.00928248	2909	3310	2570	2185	2451	1953
Alas	0.423186	5.73131	0.000688062	0.00928377	771	764	678	1088	1065	869
CG31918	0.504313	7.20762	0.000698824	0.00941974	1550	2199	2223	2676	3063	2832
Syx17	0.596765	4.09532	0.000699723	0.00942262	182	223	256	353	391	275
CG2861	-1.64229	-0.492339	0.000707612	0.00951952	16	14	14	2	5	7
CG5630	0.371541	7.43332	0.000715196	0.00961216	2421	2467	2478	3237	3545	2901
dyl	-1.77456	-0.691733	0.000718054	0.00964113	15	12	11	4	3	4
Rfabg	-1.01551	1.12254	0.000725325	0.00972927	52	34	49	23	32	13
Hsp67Ba	0.651822	7.5398	0.000728332	0.00976007	2781	1911	2396	5239	3745	2448
CG7879	0.42138	5.86877	0.000729108	0.00976097	890	768	781	1085	1161	1062
CG32196	-2.48315	-1.09976	0.000735819	0.00984123	4	14	11	1	4	0
wtrw	-0.800777	2.0929	0.000738197	0.00986342	103	77	78	62	41	47
Cct5	-0.387161	9.25813	0.000744558	0.00992912	11723	12012	10157	9465	9349	7596
CG33978	0.372306	9.41374	0.000744442	0.00992912	10358	8560	10199	12658	13356	12118
ALiX	-0.382893	7.89715	0.00074761	0.00995434	4591	4306	4295	3806	3596	2902
sni	-0.545631	4.33821	0.000747897	0.00995434	379	428	359	261	320	233
Tep4	-0.395131	8.1269	0.000749054	0.00996011	5314	4790	5439	4543	3816	3627
CG7692	-0.43268	5.44399	0.00075361	0.00999363	856	724	863	672	647	521
msn	-0.379864	8.86842	0.000753756	0.00999363	9248	7626	9008	7390	6544	6214
Ssl2	0.925174	1.31739	0.000753452	0.00999363	30	16	34	54	51	49
alpha-Est4	1.00323	0.934874	0.00076688	0.0101578	19	20	19	38	52	29
CG14945	-0.54927	4.97042	0.000772893	0.0102276	553	497	771	419	463	378
SPE	0.662804	2.72781	0.000776362	0.0102637	95	77	74	154	136	107
CHMP2B	-0.521845	4.20208	0.000797939	0.0105388	322	378	354	275	248	223
CG1441	0.95098	1.07583	0.000801543	0.0105661	16	27	23	47	44	39
miple2	0.369451	9.39015	0.000801441	0.0105661	9086	8778	10818	13484	13183	10960
CG6488	-0.520684	4.35534	0.000805105	0.0106029	437	378	358	301	302	230
CG4199	-0.366589	7.73856	0.000813534	0.0107036	3914	3986	3856	3245	3245	2776
Pde9	0.480271	5.29082	0.000821352	0.0107961	626	466	503	865	754	644
CG6954	0.388862	7.37507	0.000823839	0.0108185	2584	2090	2360	3312	3202	2828
spin	-0.385264	7.39295	0.000831136	0.0109039	3429	2814	3070	2535	2535	2168
CG33137	1.20981	0.280911	0.000847533	0.0111084	9	14	9	24	33	19
CG34334	-5.16798	-1.97933	0.000859003	0.011248	1	6	6	0	0	0
Atox1	-0.455585	5.78935	0.000867409	0.0113473	1138	943	1044	918	787	618
CG5112	0.35859	6.84218	0.000872231	0.0113995	1683	1592	1639	2279	2255	1872
CG43427	-0.448116	7.09796	0.000873935	0.011411	2818	2320	2596	2356	1743	1661
Atg7	0.555815	5.08089	0.000875417	0.0114195	457	344	539	607	688	687
dpn	0.542525	5.45115	0.00088101	0.0114815	508	655	572	711	960	884
CG34455	0.424229	5.18758	0.000884458	0.0115047	496	467	556	731	756	586
HLH106	-0.392431	7.92355	0.00088381	0.0115047	4971	4364	4135	3648	3589	3182
CG8311	0.392094	6.01711	0.000893325	0.011609	932	914	888	1306	1229	1108
CG32152	0.4278	6.94861	0.000898986	0.0116715	1627	1912	1600	2166	2611	2239
Cpr49Ac	-1.66405	7.63849	0.000902967	0.0117122	5008	2175	7762	3358	1011	510
CG31974	-2.68124	-1.45352	0.000903912	0.0117134	6	5	10	0	2	1
Jon65Aiv	3.0968	-0.608182	0.000907002	0.0117423	4	1	0	12	34	2
r-cup	-0.956528	1.03828	0.000910629	0.0117782	45	44	36	21	19	25
CG33170	-0.432218	5.97021	0.000911493	0.0117783	1033	1155	1331	869	921	849
CG4596	-5.0559	-2.0382	0.000913047	0.0117873	3	5	4	0	0	0
CG31705	0.471202	5.49409	0.000914971	0.0118011	661	582	600	1056	856	694
gol	-1.80218	-0.579186	0.000921685	0.0118765	7	16	19	5	5	2
Mal-A5	-0.531635	3.90899	0.000924397	0.0119003	301	277	284	200	200	203
CG8909	-2.11161	-0.979793	0.000925363	0.0119016	13	7	11	6	0	1
CG1518	0.337743	9.1382	0.000931028	0.011961	8121	7988	8240	11211	10875	9194
CG9836	-0.392515	5.94654	0.000931717	0.011961	1097	1150	1171	876	966	802
GstE7	1.52222	-0.00625343	0.000939357	0.0120478	3	8	11	15	20	29
kat80	0.38262	6.3457	0.000951471	0.0121918	1163	1064	1225	1684	1549	1338
sad	0.715602	2.03468	0.000954049	0.0122134	46	49	52	96	84	66
CG5151	0.432481	7.04828	0.000958529	0.0122594	1749	2075	1671	2356	2789	2386
mim	0.48314	6.25224	0.000963242	0.0123082	1254	939	912	1719	1447	1252
Tsp5D	1.16622	0.292346	0.000978854	0.0124961	11	12	10	26	32	18
CG1688	5.02752	-2.03983	0.000981261	0.0125152	0	0	0	5	5	2
LM408	-1.27805	5.60747	0.000983683	0.0125228	1605	573	1207	856	382	204
Tre1	-0.433041	5.12069	0.000983542	0.0125228	700	625	624	548	512	410
cher	-0.400906	8.98323	0.000995415	0.0126605	9417	9955	8761	7029	7030	7459
SteXh:CG42398	-1.58728	-0.454255	0.00100261	0.0127402	12	14	19	6	7	2
TwdlL	2.08316	-1.13211	0.00101683	0.012909	1	2	3	8	10	9
yellow-f2	-5.05745	-2.03804	0.00102372	0.0129845	3	6	3	0	0	0
CG12560	-1.02077	1.13343	0.00103695	0.0131281	30	58	48	27	21	20
CG2765	-0.396667	6.13493	0.00103619	0.0131281	1380	1164	1361	991	1039	970
Ntf-2	-0.410765	7.94607	0.00103879	0.013135	3987	4762	5015	3524	4003	3013
Oseg1	0.375273	6.27491	0.00103941	0.013135	1116	1030	1149	1447	1524	1359
shrb	-0.374504	7.48005	0.00105506	0.0133205	3015	3285	3558	2585	2807	2328
Arc2	-0.666852	2.40888	0.00105712	0.0133342	105	96	111	64	84	52
CG8888	2.01987	-0.157318	0.00106176	0.0133805	6	7	2	12	12	37
vps2	-0.378654	6.35396	0.00106556	0.0134161	1430	1481	1608	1283	1230	1021
CG6553	-1.56085	-0.246029	0.00107733	0.0135395	14	26	13	3	8	7
mys	-0.365415	8.44137	0.00107668	0.0135395	6712	5996	6442	5369	5083	4623
metl	-0.425807	4.95146	0.00108148	0.0135792	557	593	578	442	447	415
CG31211	0.396838	7.87822	0.00109022	0.0136765	3720	3232	2973	4588	4597	4081
Sans	0.672514	6.54466	0.00109408	0.0137125	1422	833	1272	2607	1868	1280
CG8249	0.791885	2.3487	0.00111074	0.0139085	70	46	62	138	94	82
ade2	-0.352898	6.7546	0.00111763	0.013982	2017	1961	1939	1618	1601	1478
CG3430	-0.441987	6.02676	0.00112976	0.014121	1123	1260	1284	807	1057	872
CG31121	0.400823	6.84886	0.00113142	0.0141288	1812	1590	1450	2383	2328	1820
TwdlT	1.6806	2.27144	0.00114702	0.0143106	37	35	36	241	91	31
yellow-d	0.577861	3.41614	0.00115329	0.0143759	161	126	127	237	224	169
Haspin	0.439634	6.34008	0.00115639	0.0144015	1009	1020	1336	1513	1543	1547
CG30488	0.853998	1.34364	0.0011598	0.0144309	31	23	30	51	65	39
CG7970	0.380878	6.57911	0.00116925	0.0145352	1295	1365	1398	1977	1925	1484
CG31105	1.856	-0.841843	0.00117047	0.014537	2	5	2	15	7	12
CG5525	-0.349696	9.06494	0.00117151	0.014537	9843	10162	9322	7915	8648	6862
Lip1	1.05492	0.842479	0.00117614	0.0145813	24	11	18	30	47	35
Npc2b	-1.09174	0.762659	0.00118434	0.0146698	30	48	27	14	21	15
CG17816	0.580584	3.93173	0.00118591	0.014676	226	192	175	357	282	263
Pepck	0.97254	6.83625	0.00119343	0.014754	689	1224	1868	1929	3933	1741
Teh2	-3.50464	-1.81574	0.00119436	0.014754	6	6	3	1	0	0
Tpr2	-0.340817	8.5809	0.00119949	0.0148041	6572	6917	7446	5679	5828	5245
CG2292	0.549504	4.64145	0.00120362	0.0148418	321	338	327	412	503	538
CG31728	-0.680195	5.48523	0.00120591	0.0148567	1164	619	916	746	564	410
Lsd-1	-0.92884	1.94439	0.00121575	0.0149645	72	73	95	28	42	56
Atx-1	1.30006	-0.0846686	0.00121913	0.0149793	4	10	9	18	21	19
l(2)34Fc	0.66329	3.25569	0.0012183	0.0149793	122	142	92	179	210	184
CG16947	0.507834	4.23546	0.00122447	0.0150047	285	232	239	357	408	327
cnn	0.361766	6.87956	0.00122424	0.0150047	1678	1643	1716	2127	2285	2137
Sema-2a	0.348926	9.8701	0.00122315	0.0150047	13678	12116	14525	18837	17329	15875
CG14304	0.615265	4.41171	0.00122652	0.0150076	248	279	291	336	449	475
rut	0.450306	5.87948	0.00122689	0.0150076	958	738	733	1268	1121	985
msi	0.358235	7.27112	0.00123823	0.0151329	0	2	0	3	0	0
Ror	-0.833879	1.73799	0.00123957	0.0151357	81	55	66	35	34	45
phm	-0.969818	0.909354	0.00126519	0.0154348	2062	2006	2273	2402	2678	1980
sqh	-0.354393	8.24894	0.00127665	0.0155609	5565	5642	5480	4698	4697	3883
gprs	2.14449	-1.09943	0.00130222	0.0158585	1	1	4	5	11	12
CG7016	-0.926189	0.811368	0.00131132	0.0159552	35	34	36	19	22	15
Sema-2b	0.411511	7.93598	0.00131994	0.0160458	3754	3006	3530	5457	4388	4052
CG10283	-0.681743	5.00817	0.00132416	0.01607	717	483	738	567	403	267
Dsp1	0.355188	8.36323	0.00132427	0.01607	4516	4582	5040	6365	6319	5652
alphaTry	3.19938	-1.07367	0.00132753	0.0160955	3	0	0	20	11	1
CG32773	-0.767442	1.60183	0.00133086	0.0161216	59	54	67	42	31	34
CG12299	-0.388589	6.58327	0.00133898	0.0162057	1816	1832	1659	1345	1412	1348
Asph	0.670709	2.4396	0.00134042	0.0162088	59	65	76	125	119	81
CG31019	0.733213	1.96626	0.0013416	0.0162089	56	42	41	79	75	80
CG13827	0.531175	3.95301	0.00134959	0.0162911	192	226	196	298	304	297
iPLA2-VIA	-0.366784	6.38052	0.00135951	0.0163964	1514	1427	1648	1291	1245	1076
CG42237	-0.776219	1.69716	0.00136077	0.0163973	58	70	65	32	42	40
CG31431	1.35248	-0.164097	0.00136663	0.0164534	10	8	3	21	16	18
CG11883	-0.466046	4.28575	0.00136909	0.0164687	373	343	385	266	291	251
CG9518	-1.57818	-0.535292	0.00137247	0.0164949	11	13	18	6	3	5
CG16786	-0.631317	7.04509	0.00137471	0.0165073	2990	2089	2783	2473	1588	1141
yip7	3.73862	-1.07457	0.00138951	0.0166705	2	0	0	13	20	0
CG18327	0.948025	1.20968	0.00139476	0.0167189	14	30	29	46	49	48
CG7720	1.12585	4.75051	0.00139687	0.0167296	317	117	395	938	543	368
BBS8	-0.542542	2.94175	0.00140807	0.0168387	147	143	149	108	107	91
Cyp6a9	-1.92953	-0.950563	0.00140843	0.0168387	7	13	11	1	5	2
CG43902	1.47801	-0.414685	0.0014158	0.0169121	5	8	3	12	20	14
Mst36Fa	-1.19861	0.282643	0.00141795	0.0169231	29	17	29	8	17	8
CG31344	-0.41486	4.90884	0.00141989	0.0169316	557	527	590	425	471	379
CG14857	-1.42019	-0.264302	0.00143641	0.0171137	18	13	20	5	5	9
CG18324	-0.478315	4.54003	0.00144609	0.0172141	397	413	510	328	327	304
Ppt1	0.403177	5.91144	0.00145051	0.0172517	822	831	878	1125	1342	944
MAGE	-0.498736	4.10634	0.00145664	0.0172947	317	330	333	222	275	208
out	-0.655025	3.28216	0.00145597	0.0172947	236	175	164	152	120	100
CG18193	-3.59085	-1.76578	0.00148867	0.0176599	2	4	10	0	1	0
wb	-0.470437	6.732	0.00151568	0.0179647	2279	1699	2065	1884	1327	1225
rg	0.479071	7.13035	0.00152177	0.0180214	2278	1595	1855	3347	2495	2277
beat-IIa	-3.59254	-1.76554	0.00152546	0.0180467	10	2	4	1	0	0
CG13631	-1.38165	0.147694	0.00152653	0.0180467	22	31	17	3	13	11
CG14961	-0.876262	1.10732	0.00153972	0.0181713	45	44	40	20	25	26
Lk6	0.351073	8.90495	0.00153842	0.0181713	7348	6576	6682	9625	8519	8472
CG42588	-0.416354	5.55296	0.00154188	0.0181813	961	746	916	724	663	605
Meics	0.410585	5.18434	0.00154329	0.0181822	473	473	578	723	723	610
Trf4-2	-1.96805	-1.06895	0.00154633	0.0182025	10	9	9	2	4	1
klhl10	-1.08863	1.59936	0.00154928	0.0182215	66	67	61	13	45	34
janB	-0.574755	3.62837	0.00155356	0.0182563	221	221	276	141	173	172
CG32847	1.22387	0.0201462	0.00157881	0.0185371	5	9	12	22	19	21
vg	0.37196	7.69072	0.0015931	0.018689	3058	2847	2901	3589	4271	3685
Lip4	2.33416	-1.37671	0.00164142	0.0192394	1	0	3	10	6	6
CG17625	-4.93366	-2.09972	0.00164946	0.0193056	3	4	4	0	0	0
spict	-0.398426	5.39805	0.00164987	0.0193056	769	805	764	605	667	532
csul	-0.375081	6.33404	0.00165859	0.0193911	1413	1374	1669	1158	1254	1070
CG16998	4.91496	-2.10009	0.00167766	0.0195932	0	0	0	4	3	4
CG31710	-0.470132	5.03333	0.00167873	0.0195932	645	562	649	542	491	336
CG42748	0.396486	8.45945	0.00168871	0.019693	5535	4744	4580	7481	6287	6079
blot	0.364908	7.283	0.00169247	0.0197201	2412	1994	2255	3201	2946	2564
CG42726	0.490519	4.40785	0.0016959	0.0197267	304	238	318	423	458	347
CG42727	0.490519	4.40785	0.00169495	0.0197267	304	238	318	423	458	347
bnl	0.694647	2.07573	0.00170048	0.0197632	57	40	56	78	93	80
Spn88Ea	-0.353812	7.75201	0.00172688	0.0200531	3988	3799	4043	3450	3385	2598
Cortactin	-0.349603	7.80505	0.0017341	0.0201199	4189	3902	4167	3630	3349	2806
CG34104	0.35233	6.86922	0.00173803	0.0201486	1717	1553	1753	2352	2371	1807
CG5390	0.324877	8.53268	0.00174522	0.0202148	5252	5380	5446	7237	7400	5864
CG12413	0.482987	4.07803	0.00176409	0.0203743	217	231	236	326	369	278
CG32444	-1.03977	0.922641	0.00176232	0.0203743	48	36	33	30	17	11
CG7924	-0.993797	3.16291	0.00176491	0.0203743	206	138	233	154	95	49
CG7953	2.69411	-1.41664	0.00176343	0.0203743	2	0	1	6	13	3
CG32280	-0.386608	5.74855	0.00176878	0.0204018	904	1032	1037	760	836	712
CG1673	-0.502233	5.89346	0.00177415	0.0204465	987	1209	1205	666	867	885
CG32676	0.373719	7.0659	0.00181266	0.0208729	2158	1773	1774	2689	2572	2247
CG14968	-1.06824	1.94143	0.00181602	0.0208941	65	95	87	19	48	51
S6k	-0.353774	6.75116	0.00182206	0.0209461	1956	1863	2091	1541	1574	1557
CG10948	0.362333	6.59579	0.00183784	0.0211098	1409	1230	1502	1853	1862	1676
RhoGAP18B	-0.519858	5.70662	0.00184007	0.0211178	1187	922	894	917	693	532
CG11395	-2.54201	-1.53555	0.00188063	0.0215473	6	7	6	1	1	1
CG31347	-0.633855	2.35884	0.00187995	0.0215473	91	110	97	74	62	59
Fuca	0.625652	3.08029	0.00189717	0.0217187	132	81	108	191	167	145
CG7227	1.24607	0.0329776	0.00190246	0.0217611	8	4	14	22	22	19
Reg-2	-0.540906	3.09544	0.00190561	0.021779	148	162	179	109	128	104
klu	0.497717	5.78623	0.00190853	0.0217943	926	607	703	1266	1059	888
CG43658	-0.436717	7.18182	0.00193453	0.022073	3225	2388	2555	2429	1902	1798
CG7991	0.959423	0.929025	0.00194981	0.0222253	25	17	17	31	52	34
CG9512	3.36279	-1.86963	0.00195274	0.0222253	0	1	0	6	5	3
NijA	0.410177	6.43935	0.00195186	0.0222253	1286	999	1364	1847	1704	1377
CG9850	-0.445396	5.64852	0.00196505	0.0223359	1040	974	805	697	685	712
Stam	-0.374026	6.32704	0.0019657	0.0223359	1583	1364	1483	1303	1224	955
baz	-0.36143	6.1283	0.00199541	0.0226196	1344	1258	1239	1074	1012	946
CG9628	0.516651	6.90891	0.0019956	0.0226196	1634	1235	1980	2976	2323	1771
Tequila	0.504685	4.04233	0.00199351	0.0226196	237	222	202	311	319	319
CG15293	-3.40671	-1.86836	0.00199874	0.0226365	3	6	5	1	0	0
CG42868	-3.40801	-1.86827	0.00201027	0.0227483	5	6	3	0	1	0
CG10764	-1.65686	-0.0552079	0.00201367	0.022768	18	9	36	10	6	4
tsr	-0.353701	10.2824	0.00203164	0.0229524	20677	21952	25794	19828	19402	15262
GABA-B-R3	-2.19769	-1.26569	0.00204526	0.0230873	11	4	9	2	1	2
Oaz	0.866081	0.981404	0.00206634	0.0233061	22	21	21	49	38	32
CG2493	0.340839	8.21864	0.00207411	0.0233746	4083	4312	4459	5903	5851	4805
Nmda1	-0.356167	6.70575	0.00208017	0.0234236	1782	1758	2196	1567	1647	1335
Adam	-0.338813	7.27541	0.00208549	0.0234644	2708	2797	2955	2408	2417	1977
CG42368	0.953489	0.80799	0.00209368	0.0235373	23	17	14	34	46	27
CG3368	0.329917	6.90067	0.00213139	0.0239416	1750	1637	1790	2281	2298	2021
CG13183	-1.07338	0.38728	0.002146	0.024086	20	26	33	12	17	9
CG43462	-0.897853	1.63908	0.00215359	0.0241318	55	69	67	40	21	42
EndoG	-0.431876	5.4313	0.00215193	0.0241318	710	814	895	586	721	518
CG30414	-0.753876	1.84162	0.0021589	0.024152	54	76	83	40	48	40
Uch	-0.342446	7.32901	0.00215781	0.024152	2796	2919	3075	2523	2525	2008
CG7506	-0.508904	4.56612	0.00216191	0.024166	357	494	503	332	339	295
Fit1	-0.335517	6.6414	0.00216369	0.0241662	1766	1819	1857	1475	1530	1368
orb	-1.22944	0.184376	0.00216927	0.0242088	32	14	24	9	11	10
CG13272	-0.537668	4.45211	0.002179	0.0242977	382	369	513	350	309	228
CG12943	1.33148	-0.301446	0.00218752	0.0243335	5	7	7	19	13	17
CG14880	-2.55634	0.450206	0.00218577	0.0243335	37	6	62	15	2	1
CG2278	0.598872	2.54491	0.00218413	0.0243335	70	80	72	108	132	102
CG14280	3.35983	-1.87028	0.00220055	0.0244587	0	0	1	6	6	2
CG3964	0.37283	5.69969	0.00222849	0.0247492	774	745	690	1042	993	872
CG11370	0.870486	3.13684	0.00225881	0.0250656	85	139	74	255	174	132
Plod	0.36297	6.93803	0.00227074	0.0251777	1892	1497	1862	2452	2446	1964
CG18599	3.3585	-1.87025	0.00229052	0.0253766	1	0	0	5	7	2
CG7130	-0.65148	2.29894	0.00232753	0.0257659	82	107	98	73	63	50
Osi15	-1.46378	-0.178039	0.00234861	0.0259783	16	26	13	2	10	8
CG3655	0.356956	6.99725	0.00236277	0.0261139	1960	1591	1932	2615	2412	2100
CG32683	-2.05718	-0.868753	0.00237929	0.0262754	20	4	10	2	4	2
D19A	0.368943	6.24889	0.00238268	0.0262807	1188	1065	987	1494	1488	1271
KFase	0.680484	1.90294	0.00238359	0.0262807	41	40	55	78	73	70
CG40378	-4.92867	-2.10014	0.00239731	0.0264107	4	1	6	0	0	0
CG9150	1.02357	0.48402	0.00240415	0.0264648	20	11	10	29	30	26
Fbp1	-1.42303	1.4157	0.00241412	0.0265158	100	38	44	11	40	18
Ir87a	3.37515	-1.86847	0.00241456	0.0265158	0	0	1	2	6	6
vls	0.431567	5.55224	0.00241136	0.0265158	652	737	556	878	984	808
twf	-0.402727	5.33205	0.00243695	0.0267403	757	786	692	655	601	469
Mkp3	-0.343559	6.25792	0.00247979	0.0271888	1434	1380	1366	1141	1188	1016
Tsp42Ej	-0.757918	1.84445	0.00249318	0.0273138	80	53	81	52	37	39
Arp3	-0.339307	7.06319	0.00251708	0.0275536	2381	2336	2589	2188	1985	1697
CG32702	-0.551399	4.55002	0.00252134	0.0275783	500	437	418	382	357	210
Ir51b	0.481153	3.55561	0.00252394	0.0275848	145	163	167	237	248	190
TwdlN	2.49147	-1.538	0.00252915	0.0276197	1	1	1	6	10	3
CG34388	0.548995	4.07981	0.00257054	0.0280495	210	221	236	269	379	338
ial	0.387767	6.62808	0.00258161	0.0281479	1331	1590	1257	1836	2051	1677
Chmp1	-0.347301	6.26995	0.00258415	0.0281533	1390	1457	1371	1159	1216	997
CG12885	-2.53768	-1.53608	0.00260538	0.0283563	7	3	9	2	0	1
CG30338	-0.613771	2.7219	0.00260691	0.0283563	119	144	120	78	106	71
pyx	-0.770603	1.40273	0.00262718	0.0285543	54	44	58	39	33	21
CG14141	1.19839	0.00587454	0.00264035	0.0286747	12	9	5	25	16	20
Gfat1	0.306094	9.29732	0.00266463	0.0289155	9145	8750	9642	11795	12148	10584
Idgf4	-0.36998	7.82628	0.00267038	0.0289551	3834	4280	4397	3843	3313	2712
Pgi	0.349142	7.35626	0.00270631	0.0293216	2351	2483	2203	3251	3279	2605
CG6241	-0.356449	6.18577	0.00274601	0.0297282	1322	1241	1433	1009	1170	984
CG31694	-0.328979	7.09315	0.00275439	0.0297955	2604	2320	2511	2051	2154	1804
retm	0.373679	5.21397	0.00275994	0.0298321	557	474	547	726	728	621
CG3568	0.484319	4.28101	0.00276545	0.0298681	237	239	313	376	420	325
CG3529	-0.41388	5.33351	0.0027717	0.0299122	856	721	669	646	580	490
CG1909	0.503677	3.37062	0.00277712	0.0299472	150	116	148	196	215	184
CG10962	-1.01521	2.03408	0.00278225	0.0299789	78	63	120	69	39	24
l(3)01239	-0.368111	7.28706	0.00279922	0.0301382	2537	2893	3177	2561	2290	1933
CG8004	-0.435175	4.93987	0.00281447	0.0302786	493	636	589	430	467	394
CG13685	0.69001	2.74709	0.00283678	0.0304948	101	65	81	163	109	131
CG6040	0.373439	6.92343	0.00284841	0.0305959	1955	1678	1532	2341	2253	2184
CG11069	0.332671	7.21529	0.00286037	0.0307004	2192	1949	2296	2937	2836	2453
CG14079	-1.10953	0.145338	0.00286422	0.0307177	18	29	19	13	11	7
Sox102F	0.476148	5.26701	0.00286735	0.0307274	577	417	580	912	727	590
Crg-1	0.48434	3.7997	0.00288202	0.0308605	181	185	197	252	272	272
AttB	-1.18619	0.0209195	0.00290133	0.0310431	15	21	25	10	9	8
Syb	-0.342861	7.83031	0.00290851	0.0310957	3763	4217	4466	3487	3577	2914
CG31673	-0.485685	5.14093	0.00292241	0.0312201	535	720	752	427	549	475
PH4alphaEFB	0.358608	5.99979	0.00296711	0.031673	961	884	893	1312	1258	1005
daw	-1.15704	3.33395	0.00298577	0.0318475	120	304	247	169	93	50
ena	-0.394886	7.00827	0.00298887	0.0318558	2748	2064	2343	2176	1796	1562
CG9987	-0.400935	6.26126	0.00299667	0.0319142	1457	1576	1222	1177	1196	917
CG14327	3.35254	-1.87074	0.00304534	0.0324074	0	0	1	7	6	1
Ppt2	0.397367	5.15697	0.00305255	0.032459	514	473	515	770	716	532
CG42848	-1.66379	-0.868092	0.00306488	0.0325649	13	10	9	2	5	3
CG16704	1.53082	-0.62575	0.00308084	0.0327092	4	4	5	11	19	9
CG14454	-4.80149	-2.16381	0.00308822	0.0327462	3	4	3	0	0	0
CG9953	0.329492	7.1985	0.00308908	0.0327462	2093	2007	2268	2831	2976	2331
pdgy	0.368038	6.98201	0.00311481	0.0329935	1897	1723	1775	2815	2410	1881
CG10103	-0.347139	6.44436	0.00312091	0.0330326	1558	1522	1687	1367	1405	1046
CG6073	-0.363952	5.30249	0.00313387	0.0331443	698	709	760	554	635	520
CG12643	0.569735	6.65721	0.00321223	0.0339469	1056	1568	1339	1463	2157	2292
CG34355	-0.557439	4.99787	0.00322059	0.033983	712	477	670	569	383	334
nimA	-3.30238	-1.92286	0.00322017	0.033983	4	5	4	1	0	0
CG30460	-0.580776	3.61875	0.00322461	0.0339993	277	229	207	206	159	122
CG4398	-0.828171	1.21391	0.00322944	0.0340242	44	38	56	26	35	18
ab	-0.440962	7.93806	0.00324288	0.0341396	4093	4964	4742	2874	3651	3715
pirk	-4.80217	-2.16374	0.00325636	0.0342553	4	4	2	0	0	0
EF-G2	-0.453781	4.17097	0.00327521	0.0344273	319	318	376	247	283	221
Anxb11	-0.341322	6.79921	0.00329244	0.034582	2102	2042	1936	1861	1638	1388
CG12964	0.42275	5.60414	0.0033063	0.0346827	755	660	612	1107	938	730
CG8008	4.78418	-2.16403	0.00330708	0.0346827	0	0	0	4	2	4
CG6398	0.319777	8.36346	0.00332993	0.0348958	4747	4783	4795	6271	6412	5477
CG43676	-2.3127	-1.41469	0.00334004	0.034975	8	4	9	0	4	0
O-fut1	0.352708	8.13261	0.00334266	0.0349758	3604	4033	4422	5080	5883	4677
CG15760	-2.46119	-1.57828	0.00338472	0.035389	8	5	5	1	0	2
CG6959	0.338268	7.99305	0.00343674	0.0358468	3607	3652	3744	4582	4804	4676
Obp56a	0.582786	4.00944	0.00343237	0.0358468	205	173	249	401	327	231
Osi24	0.938707	3.00807	0.00343893	0.0358468	110	72	83	281	142	100
svp	0.587189	2.76067	0.00343476	0.0358468	96	85	79	154	115	127
Cyp6t1	-1.71797	-0.950328	0.00345156	0.0359512	8	12	10	1	5	3
CG3281	-0.419614	4.33517	0.00346205	0.0360331	360	362	402	303	286	263
CG3609	0.420989	5.94921	0.00347716	0.036163	910	963	700	1218	1247	1044
alpha-Est10	-0.833299	1.77311	0.00348507	0.0362178	53	76	78	47	26	44
CG15418	-0.928064	1.32715	0.00352267	0.036581	48	35	71	25	23	33
unc	0.555985	2.69868	0.00353102	0.03664	74	93	85	122	134	120
elm	-0.372283	5.18857	0.00353783	0.036683	613	694	699	537	570	468
fray	-0.346693	6.41369	0.0036011	0.0373108	1640	1417	1610	1395	1231	1100
Jheh2	0.322846	8.74757	0.00360511	0.0373243	5770	6232	6681	7571	8559	7538
CG11737	-0.385284	4.93824	0.00360942	0.0373408	579	517	598	433	495	389
CG32354	-0.573705	3.55025	0.0036388	0.0375902	288	193	198	151	163	148
dys	0.487959	4.34603	0.003639	0.0375902	6175	4835	5341	6227	5219	5304
Kdm2	0.323747	7.61177	0.00366238	0.0378033	2942	2733	2820	3638	3703	3428
CG11961	0.319537	7.89739	0.00368684	0.0380273	3528	3204	3649	4473	4624	4036
Spn27A	0.360034	7.56136	0.00369419	0.0380745	2612	3012	2448	3578	3801	3165
CG14332	6.07319	-1.37966	0.00370035	0.0381094	0	0	0	26	0	0
His3:CG31613	-1.086	3.31923	0.00370724	0.0381519	263	220	174	51	91	163
CG14855	1.60991	-0.119514	0.00371357	0.0381598	4	4	11	36	12	12
CG42365	-0.486948	3.4702	0.00371164	0.0381598	206	183	238	164	148	141
Ant2	-0.418349	4.30847	0.00375228	0.0385242	370	368	364	278	293	265
tobi	1.15093	0.0727581	0.00375463	0.0385242	10	7	11	28	24	12
Lerp	0.389567	5.1178	0.00376387	0.0385902	521	454	491	659	627	654
Sgt1	-0.331708	6.38249	0.00377378	0.038663	1425	1512	1606	1271	1282	1111
CG43759	0.354754	6.4663	0.00378215	0.0387199	1387	1239	1163	1758	1618	1538
Cyp1	-0.321898	10.5346	0.0037856	0.0387263	25126	29132	26261	22889	23460	19228
CG1941	-1.8541	-1.13047	0.00379249	0.0387679	11	7	8	1	2	4
CG13617	-1.19969	0.117896	0.00380838	0.0389015	30	16	20	15	7	7
CG5147	0.351683	5.70208	0.00384518	0.0392483	783	752	696	1028	995	870
Mmp2	-0.650453	5.89754	0.00388266	0.0396014	1490	831	1245	1108	694	522
Sema-1a	0.506096	4.97769	0.00389563	0.0397042	489	365	416	747	493	584
CG15879	-0.553482	2.78002	0.00390215	0.0397412	117	131	145	83	98	90
CG9286	-0.365726	6.26251	0.00391063	0.0397981	1272	1418	1534	1043	1276	1009
Pu	-0.518571	2.97789	0.00394842	0.040153	137	158	152	100	122	95
CG13215	-4.79719	-2.1642	0.00397898	0.0404338	2	2	6	0	0	0
CG1628	-0.65011	2.78216	0.00398359	0.0404508	158	128	118	111	69	81
grsm	-0.330918	7.99742	0.00398713	0.0404568	4799	4587	4533	4217	3921	3139
CG32512	0.832856	3.96951	0.00400367	0.0405947	184	139	224	408	438	161
CG31004	2.25424	-1.41631	0.00400837	0.0406124	0	2	2	6	12	3
gwl	0.33441	6.17944	0.00402546	0.0407556	1087	992	1053	1302	1440	1260
CG30099	0.689062	2.16885	0.00404131	0.0408859	42	48	74	84	101	83
CG34195	0.511418	3.59476	0.00405173	0.0409612	159	139	185	217	285	198
Rac2	-0.356676	5.98229	0.00407535	0.0411697	1130	1061	1280	1034	921	798
cpa	-0.334526	7.31127	0.00408357	0.0412225	2870	2761	3034	2676	2401	1923
CG11951	5.30556	-1.8712	0.00409845	0.0412747	0	0	0	12	3	0
chic	-0.315163	10.0826	0.00410075	0.0412747	19102	19802	19893	18185	16758	13244
Irbp	-0.39995	4.70136	0.00409307	0.0412747	453	473	516	353	409	346
Pdk1	-0.372368	6.93536	0.00409739	0.0412747	2548	1889	2323	2032	1718	1550
CG8258	-0.312839	9.13536	0.00412997	0.0415384	10351	10595	9497	8848	8949	7171
CG1732	-0.76285	2.22833	0.00415621	0.0417717	72	85	125	45	59	63
CG16789	0.622459	2.71818	0.00420073	0.0421485	74	80	95	103	147	137
CG2911	-0.470682	3.40565	0.00420099	0.0421485	211	181	204	142	169	126
mbf1	-0.314014	7.34949	0.00420313	0.0421485	2819	2971	3046	2487	2553	2178
RhoGAP100F	-0.491431	3.10129	0.00420596	0.0421485	179	150	155	117	122	110
glec	0.397705	6.07076	0.00423996	0.0424582	1048	778	1012	1468	1214	1111
CG32628	1.37136	-0.557599	0.00424483	0.0424761	7	6	2	12	15	13
CG5532	0.43713	6.67436	0.00427301	0.042701	1409	1682	1135	1789	2271	1770
Samuel	0.354881	6.22197	0.00427352	0.042701	1205	986	1009	1490	1482	1192
CG7742	-3.3069	-1.92257	0.00429187	0.0428533	4	7	2	0	1	0
CG11686	0.393328	4.96067	0.00433617	0.0432596	431	405	477	665	620	472
Vinc	-0.375218	6.7288	0.00433886	0.0432596	2196	2032	1615	1600	1554	1422
Mur89F	-0.726835	3.5197	0.00437121	0.0435505	267	143	285	166	162	100
CG10147	-0.508522	3.19998	0.0043894	0.0437001	186	145	191	126	124	121
CG6878	0.410164	4.8013	0.00440724	0.043846	368	419	378	562	589	429
pip	0.944447	3.09845	0.00441471	0.0438885	121	49	113	273	158	125
CG5455	-0.770433	1.59388	0.00442519	0.0439549	72	55	52	43	26	37
Tep5	-1.61344	-0.894063	0.00442777	0.0439549	10	11	10	4	1	5
CG8303	-0.504432	3.89494	0.0044432	0.0440622	243	270	335	231	210	167
T48	0.368829	5.78025	0.004445	0.0440622	885	717	740	1131	1091	858
CG31100	-1.10542	0.81703	0.00446058	0.0441848	43	22	45	28	15	9
CG32544	0.558851	3.20605	0.00447199	0.0442341	108	101	152	167	191	179
inv	0.378856	6.54666	0.00447172	0.0442341	1449	1378	1138	1789	2001	1471
CG11454	-0.430896	4.85146	0.00450514	0.0445299	498	594	521	377	482	359
Arp1	-0.315697	7.52919	0.00453366	0.0447475	3280	3419	3311	2941	2882	2363
CG1998	0.335469	5.72915	0.00453132	0.0447475	746	787	755	1014	1025	893
CG1516	-0.345271	6.53358	0.00454085	0.0447863	1610	1849	1599	1446	1416	1191
CG6836	-1.46629	-0.599724	0.00455291	0.0448731	9	12	18	3	4	7
Aats-pro	-0.400562	4.60002	0.00455619	0.0448733	422	442	480	334	391	309
trh	0.358175	6.28343	0.00456456	0.0449235	0	0	2	5	7	2
CG13741	-0.694581	1.53318	0.00457837	0.0450272	47	56	65	37	33	35
His4:CG33887	0.685063	1.68634	0.00460943	0.0453002	35	43	38	55	68	66
CG42300	-1.56367	-0.320618	0.00461821	0.0453541	9	15	26	3	11	3
Pkc98E	0.367445	5.95029	0.00464856	0.0456196	1013	801	823	1242	1182	1031
CG13889	3.36437	-1.86941	0.00469874	0.0460792	1	0	0	1	9	4
Sox15	0.337555	7.13606	0.00473922	0.046443	1956	2173	1938	2505	2757	2509
dpp	-0.352098	6.40596	0.00478035	0.0467812	1572	1587	1483	1175	1252	1249
et	-1.08416	0.0900268	0.00478054	0.0467812	16	18	29	12	11	7
CG14102	0.578734	4.09809	0.00479382	0.0468778	190	211	267	266	421	323
CG17278	-0.298899	9.50393	0.00481551	0.0470565	12587	13419	13155	10576	11683	10040
CG12721	-2.38439	-1.62315	0.0048619	0.047476	5	6	6	1	1	1
CG4025	-0.433529	4.86043	0.00487488	0.047569	552	540	534	343	467	408
CkIIalpha-i3	-0.352526	6.02962	0.00488387	0.047623	1120	1141	1320	903	1060	880
Syt14	-1.14326	0.173783	0.00489707	0.0477178	28	27	13	11	8	12
CG12911	-2.81335	-1.71619	0.00490542	0.0477653	2	9	5	2	0	0
CG3326	0.479172	3.59069	0.00494091	0.0480428	149	172	166	215	276	200
CG8314	0.341283	6.19601	0.00493772	0.0480428	1035	1128	992	1336	1469	1255
Psa	-0.307675	6.94609	0.0049531	0.0481274	2278	2140	2250	1977	1823	1666
Karybeta3	-0.28725	9.37748	0.004984	0.0483933	12094	11757	11906	10367	10154	9199
CG5642	-0.287391	8.67657	0.00499244	0.0484411	7139	7170	7696	6214	6445	5628
Syt7	-1.3405	-0.317991	0.00500548	0.0485334	9	22	17	7	5	7
CG6656	-0.38126	4.76052	0.00500952	0.0485384	465	496	533	392	400	370
CG34194	-3.29867	-1.92332	0.00503463	0.0487379	2	3	8	1	0	0
Klc	-0.307549	7.4246	0.00504075	0.0487379	3082	2956	3258	2761	2563	2298
Traf-like	-0.388268	5.39107	0.00504048	0.0487379	776	677	872	575	698	530
ttk	0.382658	7.0434	0.00506923	0.0489788	2095	1707	1797	3053	2378	2010
grh	0.365762	8.08315	0.00509905	0.0492324	4328	3438	3832	5956	4703	4508
CG5903	-0.350188	6.82033	0.00511713	0.0493722	1927	2350	1900	1679	1772	1481
CG6700	0.309186	7.86985	0.00514474	0.0496038	3435	3217	3571	4696	4419	3756
CG8441	0.363344	5.38129	0.00515231	0.0496361	599	567	613	752	898	677
rhea	-0.369449	7.99166	0.00515531	0.0496361	5213	4076	4758	4294	3362	3362
CG12929	0.456861	3.78494	0.00517602	0.0498006	171	198	194	292	283	213
CG3308	0.318294	6.19962	0.00519045	0.0499046	1120	1009	1067	1398	1401	1243
CG15556	-1.48186	0.390277	0.0051965	0.0499278	10	42	34	5	15	11
Gbeta13F	-0.295545	8.58971	0.00521015	0.0500239	6861	6470	7453	5866	5799	5469
Lcp3	2.13318	-0.434105	0.00521954	0.0500792	2	4	5	2	30	18
CG10399	-0.449555	3.5978	0.00523737	0.0502152	238	224	215	160	196	148
yin	-0.613124	2.22138	0.00524805	0.0502825	109	80	80	59	60	59
CG6678	-0.446524	4.26447	0.00529822	0.0507279	347	334	398	292	243	265
CG11486	0.334626	7.11745	0.00532405	0.0509397	2149	1841	2017	2972	2492	2234
Whamy	-1.72376	-1.06809	0.00532927	0.0509542	8	7	12	3	1	4
CG33156	0.332924	5.27347	0.00534412	0.0510606	564	534	572	749	748	639
alphaTub85E	-1.24999	-0.196569	0.00536466	0.0511858	22	16	14	12	4	6
CG5697	-2.16879	-1.49394	0.00536239	0.0511858	8	6	5	1	2	1
Ace	-1.89566	-1.2653	0.00537335	0.0512332	9	8	6	3	1	2
CG14135	0.46108	4.15351	0.00539074	0.0513633	206	242	280	328	372	316
CG31683	0.307661	6.74694	0.0054762	0.0521415	1497	1630	1561	2114	2107	1688
CG1503	1.18547	-0.213854	0.00548302	0.0521703	8	4	10	18	14	19
n-syb	-1.89302	-1.26499	0.00549225	0.052222	8	8	7	0	3	3
CG32432	-3.38749	-1.86862	0.00550237	0.0522821	2	2	10	0	0	1
CG42676	0.429422	4.01222	0.00551351	0.0523517	214	237	216	312	317	283
Prp38	0.350947	5.02511	0.00553928	0.0525601	479	447	469	615	618	570
tkv	0.304187	8.91477	0.00556224	0.0527416	7540	6200	7413	9363	8898	8191
Cpr12A	0.464958	5.93253	0.00557118	0.0527899	888	639	986	1456	1200	881
Tsp42Ee	0.374045	9.17322	0.00558843	0.0529169	7052	8364	9190	9502	11522	11137
CG31523	-0.323699	7.28389	0.00563171	0.05329	2710	2586	3185	2447	2288	2127
CG32816	1.36097	-0.151874	0.00568782	0.053784	4	8	9	31	16	9
CG15579	-1.18464	-0.0846746	0.00569808	0.0538439	14	24	18	7	14	4
CG12655	-3.18886	-1.97976	0.0057047	0.0538694	4	3	5	0	1	0
CG6293	0.711701	1.25763	0.00573378	0.0541069	25	29	30	51	48	41
CG9902	0.381431	5.61667	0.0057798	0.0545038	735	594	754	995	838	906
CG4406	0.364656	5.91894	0.00579285	0.0545894	801	967	810	1141	1257	984
Tsp42Ed	-1.28961	-0.41196	0.00581303	0.0547283	12	18	14	6	4	8
Zasp66	1.08337	1.19198	0.00581555	0.0547283	21	30	17	44	30	70
Arf102F	-0.324019	7.48411	0.00584826	0.0549984	2968	3124	3649	2630	2905	2363
CG11052	-4.65303	-2.2312	0.00592627	0.0556939	3	2	4	0	0	0
CG3358	0.341599	5.35726	0.00597389	0.0560275	607	565	592	766	822	682
CG3746	-4.65543	-2.23094	0.00597398	0.0560275	2	4	3	0	0	0
InR	0.404883	6.7293	0.00597304	0.0560275	1756	1110	1608	2263	1970	1770
CG14608	0.618281	2.41199	0.00598238	0.0560406	54	58	89	106	104	102
mRpL23	-0.375254	5.45191	0.00598354	0.0560406	714	804	895	610	729	552
CG6966	0.351356	6.10466	0.00600032	0.0561596	1070	922	962	1496	1292	1052
tio	0.324172	6.31825	0.00602873	0.0563871	1214	1063	1187	1631	1436	1332
Prx6005	-0.338997	5.57446	0.00608578	0.056882	798	889	910	697	757	631
CG30016	-0.754737	1.43814	0.00609556	0.0569347	42	67	50	33	38	25
Syx4	1.48368	-0.844387	0.00616511	0.0575452	3	2	6	11	14	7
Taz	-0.368757	4.97497	0.00618872	0.0577264	569	585	573	428	522	409
CG7650	-0.377609	4.84119	0.0061947	0.057743	516	504	559	385	445	400
deltaTry	2.92611	-0.523103	0.00627766	0.0584766	3	2	1	5	45	1
CG7379	0.31771	6.27844	0.00630486	0.0586903	1158	1130	1086	1412	1566	1294
CG7759	1.35102	-0.496257	0.0063169	0.0587626	6	1	9	19	12	11
CG16985	-0.445387	3.97648	0.00633044	0.0588487	277	281	324	204	234	217
gogo	-0.770321	1.09095	0.00634204	0.0589167	44	46	34	26	30	18
CG17230	0.388719	5.03269	0.00636782	0.0591162	514	469	397	650	627	559
CG6830	-2.2273	-1.45275	0.00639432	0.0593222	3	6	11	0	1	3
eIF-2beta	-0.288007	8.514	0.00640417	0.0593649	6352	6526	6780	5928	5876	4596
GNBP1	0.319226	6.85905	0.00640756	0.0593649	1580	1640	1831	2420	2239	1761
CG13749	0.617637	2.27561	0.00643369	0.0595668	49	66	67	82	117	85
Cyp4g15	4.6292	-2.23201	0.0064407	0.0595916	0	0	0	2	5	2
CG13000	4.62919	-2.23201	0.00644505	0.0595918	0	0	0	2	5	2
CG18643	-0.654067	2.55396	0.00651733	0.0602196	99	100	146	59	95	68
Rh5	0.784433	0.908134	0.00652771	0.060275	24	16	23	39	33	38
SH3PX1	-0.33409	6.58125	0.00654525	0.0603964	1854	1773	1586	1543	1501	1173
Cam	-0.311273	9.94249	0.00655877	0.0604805	15669	17699	19970	15241	14773	13544
CG10211	0.411778	5.9588	0.00657375	0.0605375	1004	889	709	1374	1156	999
Gr93a	1.28008	0.0488888	0.00657355	0.0605375	10	3	13	29	12	23
CG4962	4.87635	-2.10209	0.00661046	0.0608348	0	0	0	3	8	0
CG2147	0.391587	5.23598	0.0066631	0.0612782	488	598	501	779	783	566
CG33514	0.868972	0.651672	0.00669673	0.0614232	15	17	18	24	40	29
CG34402	-4.65158	-2.2313	0.00668527	0.0614232	4	1	4	0	0	0
CG7069	-0.804428	0.75968	0.00669259	0.0614232	35	32	31	24	20	13
mael	-0.598595	2.41281	0.00669641	0.0614232	105	94	108	66	93	48
CG1809	-4.6549	-2.23101	0.00673461	0.0616883	1	4	4	0	0	0
CG30457	4.62357	-2.23247	0.00673409	0.0616883	0	0	0	3	5	1
CG8202	0.319607	6.54728	0.00675895	0.0618701	1365	1212	1494	1703	1854	1590
CG31176	0.847407	0.584711	0.00676423	0.0618772	19	14	15	33	29	26
CG9935	-1.18016	-0.179501	0.00677934	0.0619742	13	16	23	5	9	9
m	-0.980341	1.7119	0.00678609	0.0619947	88	49	68	54	39	14
CG40160	0.30221	7.78767	0.00679123	0.0620004	3129	3064	3491	4321	4065	3718
CG7800	0.510792	4.9204	0.00680274	0.0620642	281	448	488	553	637	566
CG33144	0.379999	5.37823	0.00681047	0.0620936	606	637	517	866	767	697
inaD	-0.558517	2.24935	0.00683635	0.0622883	85	99	86	60	67	59
CG1434	0.604032	4.08435	0.00686286	0.0624884	238	268	145	335	375	300
Flo-1	-0.399857	6.539	0.0068705	0.0625166	1557	1967	1635	1157	1422	1374
CG3967	0.348931	5.4661	0.00696803	0.0633621	623	602	673	763	896	788
CG1832	0.296557	7.7953	0.00698274	0.0634538	3301	3036	3419	4129	4217	3793
cnir	-0.462073	3.59181	0.00699114	0.0634612	216	224	237	182	197	123
Pa1	0.382052	6.52714	0.00699278	0.0634612	1361	1135	1423	1474	1889	1783
CG43342	-0.512508	2.69288	0.00701881	0.0636554	121	125	119	79	92	88
CG3678	-0.322991	5.88199	0.00705178	0.063904	1075	995	1133	916	955	734
vps24	-0.325653	6.1312	0.00705551	0.063904	1148	1277	1384	1038	1074	968
bgcn	0.856377	0.996044	0.00711961	0.0643574	16	22	27	30	56	34
CG12645	-1.74412	-1.19638	0.00711775	0.0643574	9	8	7	2	2	3
metro	1.43437	-0.602536	0.00711286	0.0643574	2	3	9	19	9	11
CG30184	0.729123	1.93696	0.00717876	0.0648308	46	59	31	66	85	78
pck	0.304784	7.59891	0.00718142	0.0648308	2774	2938	2762	3512	3818	3295
CG1271	0.499402	3.02434	0.00722725	0.065159	117	94	114	145	187	135
gammaTry	2.95958	-0.699755	0.00722663	0.065159	3	2	0	5	38	1
CG30031	2.95958	-0.699755	0.00723597	0.0651949	3	2	0	5	38	1
Eig71Ee	5.46589	-1.76885	0.00724516	0.0652349	0	0	0	1	16	0
CG12974	1.07317	-0.0692689	0.00725833	0.0653107	9	11	6	24	15	17
CG32669	1.22891	-0.359685	0.00727493	0.0654173	5	7	7	16	21	9
cup	-0.338564	5.28759	0.00729097	0.0655186	649	692	788	599	591	518
CG14868	-1.29076	-0.41167	0.00729742	0.0655338	13	20	11	4	6	8
CG3902	0.339565	7.02326	0.00736338	0.066083	1923	2023	1657	2725	2493	2017
CG7777	-0.821296	1.55009	0.00738593	0.0661558	71	38	67	47	28	26
CG8036	0.300649	9.56901	0.00738004	0.0661558	11408	11777	10061	14788	14559	12330
Nplp2	1.55342	-0.519546	0.00738255	0.0661558	5	2	7	24	14	5
usnp	-0.340714	5.35577	0.00743368	0.0665401	728	750	754	607	675	512
morgue	0.321708	5.56753	0.00744559	0.0666034	705	670	682	950	910	755
CG5059	0.314132	7.46152	0.00746246	0.0667109	2498	2529	2656	3026	3420	3210
CG1988	-0.697238	2.41489	0.00748772	0.0668932	83	110	123	46	74	76
CG11426	-0.821344	0.725989	0.00757453	0.0676194	30	32	34	26	13	16
GNBP3	0.294395	8.55962	0.00757885	0.0676194	5636	5159	5794	7763	7334	5636
CG11163	0.678279	4.2063	0.0076018	0.0677802	292	140	260	489	374	267
CG5484	0.302836	6.45834	0.00761654	0.0678452	1342	1232	1273	1711	1714	1401
Pdcd4	0.305355	8.52831	0.00761896	0.0678452	5527	5396	5222	7532	6254	6426
KP78a	-0.296785	7.4441	0.00763514	0.0679454	3305	2951	3133	2784	2592	2376
CG9184	-1.72853	-1.06799	0.00766963	0.0682081	14	8	5	4	1	3
CG5781	-1.61655	-1.0076	0.00770021	0.0684358	13	9	6	2	3	4
CG6607	-0.333085	5.45058	0.00771197	0.068496	783	803	792	623	710	584
Ald	0.392011	7.63587	0.00772382	0.068557	2976	3210	2199	3995	3985	3248
CG31115	-0.951706	0.170506	0.00775083	0.0687524	19	21	25	13	13	8
XRCC1	-0.33203	5.67945	0.0078684	0.0697503	918	914	956	752	732	754
RpL24	0.383736	9.89556	0.00798967	0.0707796	13026	16088	11182	16957	20597	16046
AQP	-2.46945	-1.57831	0.00802495	0.0710007	10	7	1	1	1	1
Osi6	-4.94963	-2.09904	0.00802024	0.0710007	1	9	1	0	0	0
CG2812	0.341789	5.05796	0.0080309	0.0710076	515	458	459	644	627	570
CG3770	-0.365583	4.62168	0.00808611	0.0714498	469	452	428	385	362	317
knk	0.299266	7.24804	0.0081125	0.071637	2265	2004	2402	3001	2906	2430
Picot	1.071	0.262359	0.00813602	0.0717985	9	12	13	14	25	33
NFAT	0.359058	6.72867	0.00819186	0.0722449	1737	1477	1323	2261	1789	1851
Khc	-0.325312	7.93822	0.00822797	0.0725169	4930	4321	4082	4096	3620	3115
Np	0.634755	6.04864	0.008303	0.0731313	1213	616	706	1879	1207	943
CG32698	-0.651756	1.60486	0.00831454	0.073186	56	51	68	33	48	32
Mdr49	-0.400051	6.02423	0.00838831	0.0737881	1379	1060	1180	1171	893	733
CG5038	0.421914	4.38413	0.00842334	0.0740489	281	241	348	405	412	363
nimC1	-1.83403	-1.30189	0.00856299	0.0752285	9	5	8	1	4	1
CG15100	-0.298033	7.28856	0.008577	0.0752724	2920	2533	2986	2529	2407	2035
Pop2	0.308383	6.46872	0.00857895	0.0752724	1391	1213	1263	1690	1791	1392
CG34034	-2.09448	-1.53636	0.00858444	0.0752726	7	5	6	3	1	0
CG5498	0.348937	6.36773	0.00868335	0.0760914	1058	1100	1396	1451	1633	1490
pk	0.484584	5.93173	0.00869579	0.0761519	1059	827	593	1384	1204	957
CG3792	-0.322846	6.33098	0.00872257	0.0763378	1309	1474	1589	1307	1264	989
Taf2	0.294447	6.87053	0.0087596	0.076572	1745	1529	1870	2272	2204	1922
Trh	2.57013	-1.81789	0.00876047	0.076572	1235	1080	1018	1401	1524	1402
Prm	1.71941	0.871433	0.00880285	0.0768447	7	26	6	14	41	73
Tig	-0.688775	2.65991	0.00880192	0.0768447	148	122	104	114	74	50
Swim	-0.615896	2.68285	0.008816	0.0769106	86	147	140	82	88	77
dve	0.320172	6.80722	0.0088218	0.0769125	1852	1543	1471	2060	2141	1956
CG31775	-1.80126	0.57839	0.00883593	0.0769868	75	15	15	3	15	12
CG31415	-1.38003	-0.739135	0.00885148	0.0770735	12	13	9	4	3	6
dnr1	0.43014	4.43113	0.00888126	0.0772838	319	310	264	366	442	410
CG2246	0.283531	6.90636	0.0088979	0.0773796	1697	1787	1803	2255	2302	1978
htl	-0.397164	5.43867	0.00890614	0.0774023	936	663	810	730	635	498
hbs	0.486916	6.0753	0.00894738	0.0777116	1154	699	894	1713	1209	1004
CG7131	0.668705	1.31114	0.00897521	0.0778059	25	30	34	53	50	41
CG9406	3.15333	-1.97977	0.00897291	0.0778059	0	1	0	7	1	4
Cyp6a19	-1.94808	-1.41461	0.00897034	0.0778059	6	6	8	1	4	0
CG13196	-2.16632	-1.49318	0.00907442	0.0786164	10	7	2	1	1	2
achi	0.322276	5.51752	0.00910308	0.0787654	646	645	696	839	944	742
sr	0.580402	3.97055	0.0091022	0.0787654	244	169	197	424	280	228
GstS1	-0.27481	8.96882	0.00911843	0.0788486	9261	9033	8522	8066	7759	6708
su(s)	0.296927	7.003	0.00915125	0.0790826	2037	1724	1868	2560	2375	2087
CG3632	0.284578	6.73052	0.00925492	0.0798781	1659	1412	1612	2067	1992	1730
Ubi-p5E	-0.30073	10.5118	0.00925163	0.0798781	26138	24051	28749	25069	22545	17672
nop5	-0.266919	8.53477	0.00928934	0.080125	6508	6683	6613	5893	5906	4936
Cyp4ac1	1.27997	-0.472256	0.00931748	0.0803173	6	3	8	10	13	19
CG42749	-0.651766	3.59715	0.00945004	0.0814032	303	189	225	216	154	98
mRpL20	0.343524	5.63418	0.0094553	0.0814032	651	737	748	935	1080	750
C1GalTA	0.32587	5.39575	0.00947746	0.081492	610	609	603	801	774	739
CG8192	0.437337	3.90139	0.00947258	0.081492	219	191	206	291	336	224
CG30485	0.617902	1.63444	0.00951184	0.0817365	38	39	38	52	67	60
CG5966	0.422831	4.18865	0.00951856	0.0817431	249	250	258	417	335	282
CG10479	-0.985089	0.236094	0.00953515	0.0818345	26	17	26	14	7	14
CG1444	-0.630486	1.51603	0.00955565	0.0819592	58	53	52	34	44	29
RhoBTB	0.287442	7.32103	0.00956943	0.0820263	2447	2158	2441	2975	3026	2712
CG12868	-0.520335	3.11481	0.00963412	0.0825177	144	163	186	103	113	130
CG17147	-3.06749	-2.03857	0.00963877	0.0825177	4	3	4	1	0	0
JhI-21	-0.325939	7.24882	0.00966063	0.0826534	2518	2499	3270	2466	2263	1977
fz	0.288982	7.60146	0.00968681	0.0828258	3015	2603	2936	3634	3726	3238
CG12821	0.302302	6.29337	0.00970736	0.0829317	1096	1210	1122	1476	1530	1291
CG13531	0.356104	5.92204	0.00971728	0.0829317	939	691	973	1213	1131	1029
NK7.1	-0.398634	4.28119	0.00971687	0.0829317	364	357	354	258	326	245
CG11050	-0.327366	5.24074	0.00972435	0.0829405	694	655	704	527	623	510
CG4302	-0.613707	1.84119	0.00973824	0.0830075	56	75	74	53	43	40
Obp99b	-1.87429	1.29581	0.00983146	0.0837501	130	24	26	4	34	12
CG7888	0.803288	0.739306	0.00986741	0.0840044	14	16	25	38	36	24
Piezo	-0.341211	6.58413	0.00989093	0.0841525	1688	1575	1985	1522	1268	1390
CG10508	-0.718406	2.046	0.00993137	0.0844272	59	100	85	37	60	53
CG32626	-0.349664	6.00843	0.0099355	0.0844272	1301	1041	1184	1096	985	741
CG1815	0.303006	7.96758	0.00994417	0.0844487	3854	3279	3838	5000	4417	4286
CG6145	-0.354799	5.91484	0.0100266	0.0850441	1273	961	1075	1007	907	721
Kaz-m1	1.2775	-0.693157	0.0100217	0.0850441	4	6	4	11	13	11
CG10166	0.317816	5.88195	0.0100538	0.085142	791	828	946	1115	1202	934
Lin29	-3.06965	-2.03832	0.0100568	0.085142	3	5	3	1	0	0
NetA	0.650862	4.70022	0.0100483	0.085142	409	244	333	773	508	311
l(2)37Cc	-0.311115	7.82328	0.0100883	0.0853564	4051	4455	3737	3383	3691	2973
Egfr	0.313308	8.73287	0.0101857	0.0861271	6989	5409	6178	9069	7808	6603
CHKov2	-0.406318	4.3602	0.0101955	0.0861575	329	411	398	289	299	282
nAcRalpha-30D	-3.06717	-2.0387	0.0103883	0.0877329	5	2	4	0	1	0
CG32549	-0.394028	4.73571	0.0104804	0.088456	563	429	483	440	360	339
CG32109	-0.343889	5.50071	0.0105031	0.0885393	754	822	896	618	695	656
W	-0.452298	5.47969	0.0105007	0.0885393	104	101	52	2	0	1
CG10859	-4.49181	-2.30145	0.0105559	0.0886579	2	3	3	0	0	0
Cyp6d2	0.793017	1.2749	0.0105454	0.0886579	16	33	33	62	44	39
grk	-0.405295	4.46766	0.0105556	0.0886579	430	347	452	288	353	298
Hsp83	-0.290805	11.594	0.0105411	0.0886579	55843	51920	58791	43531	54018	40781
Ir20a	-4.49181	-2.30145	0.0105509	0.0886579	2	3	3	0	0	0
sgl	-0.301232	6.10926	0.0105238	0.0886579	1315	1182	1226	1113	1098	865
CG2976	0.312179	6.05831	0.010569	0.0887142	916	1024	961	1204	1353	1104
CG16888	-0.993511	-0.00907538	0.0106042	0.0889553	16	22	19	9	14	6
CG5872	0.327133	5.29125	0.0106156	0.0889962	559	513	624	740	711	700
Best3	4.47304	-2.30171	0.0106375	0.0890193	0	0	0	2	3	3
CG13293	0.53623	2.21837	0.0106311	0.0890193	69	50	62	95	86	85
CG31712	0.285494	6.77658	0.0106378	0.0890193	1668	1603	1556	2058	1985	1916
l(3)neo43	-0.421306	3.59778	0.0106565	0.0891215	199	219	254	166	178	164
CG43444	0.307369	9.21888	0.0106863	0.0892624	9912	8010	8133	11760	10420	10456
DAAM	-0.504551	5.83204	0.0106821	0.0892624	1339	874	1054	1081	737	540
CG30280	-1.94146	-1.41447	0.0107097	0.0894036	7	3	10	3	1	1
CG14164	-0.701173	1.46424	0.0107981	0.0900866	64	49	47	26	46	28
SamDC	-0.397193	5.22711	0.0108087	0.0901204	554	684	841	523	562	512
CG42299	-1.24119	0.0466502	0.0108303	0.0901966	14	14	35	8	15	4
Odc1	4.65337	-2.2306	0.0108309	0.0901966	0	0	0	0	4	5
CG2124	-0.412664	3.86929	0.0108897	0.0905766	284	258	268	222	194	200
CG34112	-0.416086	4.56208	0.0108838	0.0905766	399	438	478	283	376	337
Arf79F	-0.283349	9.93251	0.0108967	0.0905799	16191	16381	19978	15306	15142	13319
CG2950	0.324754	6.0887	0.010914	0.0906686	1115	936	899	1292	1276	1178
Prx3	-0.298923	6.5869	0.0109284	0.0907336	1615	1787	1778	1419	1601	1262
l(1)dd4	-0.295905	6.51094	0.0110524	0.0917076	1598	1526	1792	1348	1417	1288
CG17211	-0.300211	7.32517	0.0110602	0.091717	3004	2512	3150	2558	2365	2203
CG10006	-0.701185	1.3741	0.0110745	0.0917393	57	45	48	22	35	36
CG32453	-4.49346	-2.30129	0.0110762	0.0917393	2	4	2	0	0	0
Ent2	0.276741	8.26841	0.0111114	0.0919749	4430	4525	4682	5793	6032	4966
CG11275	0.304412	7.33996	0.0111291	0.0920659	2496	2383	2203	2871	3414	2615
CG14291	-0.287963	6.8748	0.0111543	0.092211	2024	1988	2300	1957	1775	1521
CG7137	-0.320528	5.09907	0.01116	0.092211	649	574	634	519	551	441
CG42541	-1.02951	-0.0220584	0.0111786	0.0923093	21	14	22	7	9	12
CG31743	-0.368111	5.15462	0.0112692	0.0929453	620	701	634	486	501	542
CG34313	-0.368111	5.15462	0.0112671	0.0929453	620	701	634	486	501	542
La	-0.281437	8.31637	0.0112899	0.0930601	5528	5841	5728	4930	5204	4178
Sema-1b	0.294269	8.81665	0.0113466	0.0934257	7221	5636	6986	8908	8116	7613
uif	0.345624	9.48892	0.0113478	0.0934257	12046	10198	8675	14811	12367	12655
Cad86C	0.289531	7.46961	0.0113795	0.0936308	2836	2375	2592	3409	3254	3002
CG15602	0.360552	4.39034	0.01144	0.0940214	315	288	290	390	419	355
CG9723	0.31258	5.88399	0.0114407	0.0940214	954	782	837	1139	1116	987
colt	0.308819	6.08726	0.0115341	0.0947325	1043	999	922	1342	1343	1056
CG11658	-0.592517	1.6527	0.0115507	0.0948125	60	60	58	36	51	33
Vps28	-0.324964	5.44507	0.0115607	0.0948376	829	801	732	648	712	559
CG5466	0.30608	5.59535	0.0115759	0.0949056	737	675	698	963	876	808
fbp	-0.335899	6.52303	0.0115837	0.094913	1673	1674	1666	1595	1465	1005
2mit	1.39796	-0.895243	0.0116299	0.0952353	4	5	2	7	12	11
Aldh-III	0.282642	7.42345	0.0116682	0.0953218	2644	2453	2475	3120	3494	2752
CG18088	-4.48971	-2.30165	0.0116507	0.0953218	4	1	3	0	0	0
CG31189	-4.49112	-2.30152	0.0116578	0.0953218	1	3	4	0	0	0
itp	-0.482437	3.59628	0.0116635	0.0953218	223	176	286	177	177	143
nimB4	2.24586	-1.67122	0.0116973	0.0955025	3	0	0	6	8	2
alphaTub84D	-0.344736	8.94754	0.0117286	0.0956445	11067	7307	8683	7490	7219	6842
cue	0.295851	5.66179	0.0117286	0.0956445	747	709	763	976	986	807
CG14416	-4.49298	-2.30136	0.0117695	0.095914	1	4	3	0	0	0
CG15211	-0.666077	2.72295	0.0117756	0.095914	97	153	139	58	104	86
CG31140	-0.891318	2.08796	0.011786	0.0959185	111	63	89	82	34	29
CG43702	-4.49452	-2.30122	0.0117901	0.0959185	3	4	1	0	0	0
ImpE2	0.961824	10.9553	0.011805	0.0959595	28503	9290	28605	75203	37110	20780
l(2)k05819	0.277804	7.35538	0.0118091	0.0959595	2530	2264	2446	3188	3121	2611
CG11714	4.47336	-2.30175	0.0118324	0.0960917	0	0	0	1	4	3
CG13599	-0.381962	4.54625	0.0118779	0.0963477	378	442	467	315	377	310
crc	-0.272431	10.7189	0.0118726	0.0963477	27910	24673	24600	31321	28681	21844
Aats-cys	-0.270445	6.87968	0.0119389	0.0967749	2113	2042	2139	1908	1828	1566
RpLP0-like	-0.281539	6.79926	0.0119447	0.0967749	1882	2012	2078	1688	1867	1444
CG1275	0.330504	4.91674	0.0119791	0.0969395	416	431	457	544	618	503
CG42360	0.359627	5.48112	0.0119771	0.0969395	523	648	739	846	866	772
ScpX	0.278805	6.7668	0.0120141	0.097166	1671	1629	1505	2053	2122	1754
CG14701	-0.415318	3.78696	0.0120384	0.0973054	253	234	279	185	234	165
CG17549	0.367845	5.81655	0.0120504	0.0973451	662	891	847	976	1172	994
26-29-p	0.257444	9.0974	0.0121118	0.0977832	7925	7929	8562	10300	10700	8669
CG11400	-1.13912	-0.318323	0.0121712	0.0982052	16	18	12	10	4	7
CG3448	-0.44155	3.70542	0.0121956	0.0983445	206	241	282	176	180	186
CG18428	0.330625	4.86611	0.012342	0.0994667	418	406	435	573	589	450
Atg12	0.439445	3.57215	0.0123692	0.0996279	147	184	157	238	259	179
Lis-1	-0.276054	7.76223	0.0124155	0.0999421	3841	3645	4151	3324	3368	3043
CG17292	0.349268	5.46892	0.0124541	0.100135	560	662	678	761	863	823
CG3348	0.421853	3.45947	0.0124529	0.100135	162	140	153	187	236	195
CG11141	-0.30556	5.30197	0.0124997	0.100326	726	698	703	648	586	515
CG30355	-1.31887	-0.317991	0.0124939	0.100326	18	9	21	8	1	10
CG8778	0.31748	5.28203	0.0124911	0.100326	510	588	591	764	755	622
CG11852	1.57532	-0.712669	0.0125076	0.100331	4	3	5	7	7	22
shep	-0.291228	7.27926	0.0125454	0.100576	2939	2449	2981	2425	2317	2179
chas	0.303249	6.96868	0.0125646	0.100612	2036	1786	1655	2534	2280	2054
T-cp1	-0.264577	9.26062	0.0125608	0.100612	11101	10722	10920	10251	9754	7763
CG10512	-0.627225	1.44793	0.0126013	0.100847	60	49	46	39	36	27
CG8550	-2.00728	-1.57852	0.0126757	0.101383	6	5	6	2	0	2
Gr8a	0.885013	0.268327	0.0127647	0.102036	15	11	11	25	29	16
Cng	3.03695	-2.03819	0.0127741	0.102052	0	1	0	1	5	5
CG12006	0.276613	8.20338	0.0128004	0.102143	4538	3972	4538	5619	5467	4933
CG9993	-3.06481	-2.03893	0.0127996	0.102143	4	1	6	0	1	0
CG14636	-0.444675	2.91166	0.0128083	0.102147	147	128	143	119	104	89
TwdlBeta	1.23424	0.0784752	0.0128361	0.102309	7	17	3	15	26	24
CG43176	-4.80329	-2.1638	0.0128617	0.102454	8	2	0	0	0	0
CG34377	-2.51791	-1.86841	0.0129096	0.102776	4	6	3	2	0	0
pes	-0.323417	5.00885	0.012992	0.103372	546	578	621	522	480	415
CG33284	-2.51421	-1.86896	0.0130363	0.103665	6	2	5	1	1	0
lea	0.291247	8.64062	0.0130456	0.103679	6657	5369	5533	8078	7154	6577
l(2)06496	-0.370709	4.90246	0.0130575	0.103713	532	605	504	416	510	368
alphaTub84B	-0.287774	12.2505	0.013068	0.103737	94931	86864	80072	81541	75990	61155
CG15125	3.03487	-2.0386	0.0131502	0.104269	1	0	0	6	1	4
CG8661	-4.49015	-2.30158	0.0131457	0.104269	5	1	2	0	0	0
CG4829	0.623319	2.52238	0.0132108	0.104689	87	68	61	153	110	78
net	-0.323053	5.27188	0.0133474	0.10571	642	763	687	583	588	527
Mes2	-0.504891	3.72616	0.013359	0.105742	276	231	246	247	154	140
GRHRII	3.02241	-2.03979	0.013404	0.106036	0	0	1	2	7	2
rols	0.32729	7.30851	0.0134513	0.106349	2682	2195	1992	3231	3083	2469
sinu	0.294789	8.14458	0.0134926	0.106615	3900	4002	4536	4821	5663	4957
CG6726	-0.323593	5.42192	0.0135675	0.107145	714	727	887	639	689	560
CG32795	0.291783	5.76206	0.0136346	0.107613	823	792	766	1032	1068	865
KP78b	-0.264063	6.75351	0.0136565	0.107724	1912	1808	2038	1656	1722	1485
Argk	-0.392988	9.24677	0.0136797	0.107826	12761	10493	10482	11697	8231	6379
CG10628	0.343295	4.55382	0.013693	0.107826	320	352	335	436	469	393
CG7967	-0.281568	7.12931	0.0136863	0.107826	2617	2428	2464	2329	2223	1743
CG14933	-2.51339	-1.86899	0.0137248	0.107954	5	2	6	2	0	0
CG42486	-2.51339	-1.86899	0.0137246	0.107954	5	2	6	2	0	0
NijB	0.406035	4.33815	0.0137446	0.108047	255	307	283	427	426	292
CG14995	-0.339821	4.96604	0.013793	0.108275	623	489	592	486	457	421
CG1532	0.290166	6.53801	0.0137972	0.108275	1243	1391	1451	1825	1794	1463
Elo68beta	-1.30729	-0.62267	0.013795	0.108275	7	18	12	6	5	4
CG40467	-3.06069	-2.03808	0.013812	0.108329	7	2	2	0	0	1
aPKC	-0.27382	7.31691	0.0138204	0.108334	2879	2724	2932	2556	2352	2244
CG2893	1.07873	0.203209	0.0138968	0.10887	10	8	14	32	29	9
Or22c	1.34574	-0.923921	0.0139593	0.109298	4	4	3	12	9	8
Nhe2	-0.468769	4.25622	0.0139852	0.109438	395	287	399	337	250	208
CG43116	1.52187	-1.16438	0.0140004	0.109494	1	3	4	8	8	8
CG6619	-1.27714	-0.716001	0.0140193	0.10958	14	9	11	4	5	5
Acp32CD	1.25005	-0.229931	0.0140305	0.109605	9	9	3	24	8	19
CG10916	-0.383938	4.1287	0.01411	0.11008	306	311	346	265	286	201
CG9350	-0.367526	5.95746	0.0141117	0.11008	1078	1368	962	919	954	817
LKR	0.401604	3.37375	0.0141158	0.11008	145	133	154	216	207	158
ZC3H3	0.312076	5.14971	0.0141232	0.11008	511	514	519	663	738	551
CG4847	4.49041	-2.30072	0.0141435	0.110175	0	0	0	2	1	5
CG14194	0.273883	6.73726	0.0141696	0.110316	1685	1548	1485	2022	2116	1669
gk	0.408644	4.33423	0.0141804	0.110338	758	605	567	689	705	543
CG12007	-0.325724	4.93316	0.0142012	0.110437	541	510	607	494	463	387
insv	-0.402827	3.88735	0.0142132	0.110468	263	292	262	215	205	206
plexB	0.273835	8.69908	0.01427	0.110846	6223	5471	6736	7717	7472	7322
E23	-0.622296	3.49677	0.0143741	0.111592	265	159	240	208	128	104
CG15005	-0.718554	0.803164	0.0144083	0.111794	28	35	36	25	19	17
CG7560	-1.25917	-0.644347	0.0144281	0.111885	9	15	12	5	3	7
Cep135	0.27443	6.79683	0.0144529	0.112014	1724	1460	1740	2096	2075	1863
mRpL48	-0.335935	4.70513	0.0144618	0.11202	476	455	487	365	435	341
YT521-B	0.27317	8.41706	0.0145649	0.112755	5321	4962	4850	6380	6503	5681
E(spl)m6-BFM	0.501169	4.00128	0.0146607	0.113433	220	189	235	404	322	208
Krn	0.309863	5.09064	0.0147937	0.114397	474	502	507	637	690	543
CG5104	0.31832	5.81925	0.0148428	0.114712	749	757	951	1100	1121	892
CG11380	-1.28523	1.49019	0.0149098	0.115101	83	27	77	51	20	8
CG18557	-2.51475	-1.86885	0.0149082	0.115101	7	2	4	2	0	0
CG2310	0.412326	6.63065	0.0149275	0.115173	1457	1666	1015	1744	2018	1832
alpha-Man-IIb	0.348439	5.41313	0.0149562	0.115227	697	494	641	858	801	706
CG4674	-0.288609	6.00027	0.0149435	0.115227	1138	1137	1162	1008	939	904
Dot	-0.447335	3.71493	0.0149596	0.115227	218	218	300	178	177	189
CG14812	-0.338978	5.20388	0.0149981	0.115458	612	719	675	551	633	435
CG1339	2.48741	-1.86768	0.0150545	0.115828	0	1	1	2	4	7
CG32249	3.35557	-1.87	0.0151252	0.116306	0	0	1	0	11	3
CG14763	0.474286	2.67296	0.0151537	0.116395	82	84	90	127	144	92
Dl	0.359233	6.82316	0.0151518	0.116395	1896	1321	1639	2550	1876	1888
G-oalpha47A	-0.355891	5.15124	0.0152194	0.11677	651	560	738	611	476	457
pigeon	0.362019	5.09128	0.0152138	0.11677	521	492	440	565	669	653
CG3419	0.360761	4.44307	0.0153102	0.117401	331	306	289	385	431	389
Vps16A	-0.288168	6.26706	0.0153358	0.117532	1353	1252	1537	1232	1160	1046
Osi14	-0.743637	3.6706	0.0153467	0.11755	212	379	178	110	181	174
CG3939	0.331222	6.40328	0.0154326	0.118142	1114	1330	1214	1689	1823	1199
Best1	-0.287771	5.83071	0.0154769	0.118415	1044	985	1026	871	873	793
Gld	0.417688	4.69696	0.0154933	0.118475	401	317	364	627	479	370
Nplp1	-0.947299	0.539131	0.0156117	0.119314	34	32	20	22	7	16
CG8500	-0.37141	3.92343	0.0156332	0.119411	267	273	291	224	240	189
Tsp97E	0.275532	6.16227	0.0156823	0.11972	1035	1063	1066	1344	1404	1146
CG15432	0.300129	5.05833	0.0156972	0.119767	482	472	502	621	641	557
CG14980	0.309705	4.90541	0.0157553	0.120117	419	434	451	573	580	489
CG7694	0.385632	3.95857	0.0157605	0.120117	208	200	247	280	316	271
BthD	-0.390156	5.58259	0.0158244	0.120537	692	948	1013	606	766	676
CG3216	-1.03275	-0.114564	0.0158492	0.120593	12	17	24	9	7	10
Lig4	0.398856	4.17097	0.0158461	0.120593	220	235	301	336	354	319
jar	-0.378058	9.03328	0.015869	0.120677	11560	8054	9387	9764	7012	5976
drpr	0.271261	7.08971	0.0160064	0.121654	2120	1949	1964	2668	2436	2281
CG15706	-0.321974	4.98596	0.0160395	0.121838	611	511	596	500	507	391
CG15046	-0.746345	2.32761	0.0160764	0.12191	140	93	67	85	55	43
CG4576	-0.603563	2.01656	0.0160682	0.12191	93	63	76	69	43	43
cpo	-0.729485	2.09363	0.0160844	0.12191	104	48	102	62	59	35
Hsp26	0.755611	6.6128	0.0160675	0.12191	1828	959	766	2439	2824	972
Csp	-0.280351	7.41326	0.0160946	0.12192	3015	2760	3378	2766	2490	2374
betaTub60D	-0.57027	8.01623	0.0161143	0.122002	6016	3934	5212	5344	3143	2022
CG9257	0.29886	5.85	0.0161627	0.122301	886	794	846	1201	1044	914
Cyp6a20	-1.31569	-0.868181	0.0162722	0.123062	10	9	11	4	4	4
CG34261	-0.383122	4.31819	0.016286	0.123095	347	373	378	253	333	268
rdgB	-0.43515	4.03157	0.0162945	0.123095	301	308	304	261	187	234
CG16700	0.390656	5.24089	0.0163262	0.123267	527	527	542	604	684	812
CG9149	0.293645	5.81025	0.0163734	0.123556	863	819	778	1065	1102	900
CG2837	-1.18985	-0.179202	0.0164105	0.123768	8	26	18	6	10	7
CG12171	-0.34852	4.94977	0.016436	0.123891	560	627	497	466	494	388
velo	0.274107	7.88672	0.0164801	0.124156	3716	3474	3280	4602	4558	3727
CG4577	2.18007	-1.71606	0.016503	0.124261	1	0	2	6	2	7
CG33494	-2.3721	-1.62401	0.0165207	0.124326	4	1	12	1	1	1
TpnC73F	0.952838	1.15565	0.0165374	0.124383	18	36	16	27	54	56
Edg91	0.72398	1.2332	0.0165559	0.124454	17	34	31	39	58	41
CG11309	-0.332681	4.46278	0.0165778	0.124551	398	399	399	344	344	278
Esp	-1.17879	-0.5584	0.0166103	0.124727	13	15	10	6	10	1
opa	0.377233	4.07422	0.0166681	0.125093	255	242	214	336	332	272
Atf6	-0.284169	6.52487	0.0166871	0.125167	1548	1552	1846	1406	1403	1302
CG9760	-0.672682	1.52451	0.0167289	0.125412	61	52	53	22	43	40
sals	0.516411	2.35094	0.0167512	0.125511	74	72	54	108	106	78
CG33671	0.264009	7.57308	0.016907	0.126553	2698	2837	2925	3682	3622	3025
CG33672	0.264009	7.57308	0.0169087	0.126553	2698	2837	2925	3682	3622	3025
CG9733	-1.00991	-0.0379469	0.0169203	0.126571	27	13	16	10	9	9
tay	-0.310439	7.21689	0.0169805	0.126883	3072	2437	2545	2529	2056	2003
Tret1-2	-1.43976	-0.896503	0.0169802	0.126883	11	5	14	2	7	2
Myo95E	0.281266	6.25964	0.0169985	0.126949	1126	1037	1219	1427	1391	1339
Fer1HCH	0.273502	8.02952	0.0170498	0.127263	3686	4111	3760	4806	5068	4321
CG34006	0.898036	0.167914	0.0171644	0.12791	15	10	9	28	23	14
CG4433	-0.333166	4.91835	0.0171623	0.12791	588	544	510	415	489	418
Lmpt	-0.573814	1.85489	0.0171613	0.12791	68	59	78	41	62	37
RluA-1	-1.56565	-1.16445	0.0172046	0.12814	10	6	8	6	1	1
CG31812	-0.365376	4.47212	0.0172242	0.128216	352	399	466	323	342	293
CG12078	-1.31337	-0.86778	0.0172552	0.12832	12	8	10	3	4	5
CG8239	-0.340586	4.36168	0.0172568	0.12832	362	361	395	312	331	255
CG11739	0.304883	5.5566	0.0173328	0.128815	695	667	693	978	924	688
Act87E	-0.284912	8.00691	0.0174161	0.129001	4535	4696	4579	4471	3958	3136
CG1041	0.289851	6.32747	0.0173851	0.129001	1212	1105	1215	1707	1431	1253
CG3040	-0.435675	4.12611	0.0174235	0.129001	259	361	355	270	273	193
CG34424	0.423642	3.81309	0.017423	0.129001	207	216	158	261	283	248
CG5973	-0.414978	4.10185	0.0173992	0.129001	273	294	388	259	240	226
CG8974	0.266902	7.48223	0.0173964	0.129001	2575	2558	2806	3413	3585	2728
NT5E-2	1.28229	-0.200854	0.017369	0.129001	11	5	5	32	12	9
CG11089	-0.262203	7.16681	0.017443	0.129063	2550	2465	2648	2386	2220	1889
CG31381	-0.262203	7.16681	0.0174506	0.129063	2550	2465	2648	2386	2220	1889
CG7280	0.331152	5.45994	0.0174721	0.129153	630	710	558	882	844	707
CG4542	0.387197	5.01526	0.0174936	0.129242	472	526	364	580	661	570
Wbp2	-0.278844	5.91595	0.0176061	0.130003	1056	1068	1108	902	954	845
CG30020	0.269259	7.48546	0.0177071	0.130589	2774	2450	2727	3240	3305	3146
CG30324	0.734511	0.836193	0.017731	0.130589	12	23	26	31	37	35
CG33914	-1.19894	-0.536433	0.0177085	0.130589	12	8	19	4	8	5
CG5254	-0.565879	1.6397	0.0177424	0.130589	50	64	61	38	46	36
ckd	-0.348159	4.46927	0.0177409	0.130589	369	394	445	355	319	289
Ucp4A	0.37809	4.59547	0.017722	0.130589	379	352	291	425	479	442
CG11077	-0.442341	4.2231	0.0178379	0.131222	291	411	342	268	314	204
CG10082	0.263479	7.23412	0.0178583	0.131231	2371	2140	2178	2755	2860	2528
CG31462	-0.738884	1.45934	0.0178577	0.131231	74	46	41	45	26	27
gukh	0.337715	7.5389	0.017993	0.132119	3234	2562	2229	3845	3416	3053
ste24c	2.45693	-1.87033	0.0179983	0.132119	1	1	0	8	4	1
Cyp12a4	0.917875	-0.0693612	0.0180146	0.132168	7	10	11	21	16	17
CG14830	0.283774	5.89871	0.0180259	0.13218	886	817	926	1056	1165	1021
CG7206	0.275612	6.2868	0.0181272	0.132852	1118	1157	1175	1476	1582	1196
CG7609	0.289119	5.31352	0.0183036	0.134074	590	565	591	705	812	650
CG2975	-0.475828	2.66005	0.0183761	0.134487	111	120	122	109	76	73
CG31460	0.307271	5.20817	0.0183796	0.134487	515	520	577	637	769	618
fd68A	0.255362	7.77676	0.0184347	0.134819	3316	3167	3294	4027	4185	3629
CG43980	0.425151	5.93499	0.0184719	0.135019	1101	771	676	1427	1172	899
CG2017	-0.299881	5.73229	0.0184856	0.135047	867	1007	988	805	782	767
Spn77Ba	0.256348	7.59706	0.0186162	0.135929	2881	2797	2951	3687	3734	3058
CG8785	2.48705	-1.86805	0.0187358	0.13673	2	0	0	6	1	6
Nf-YA	0.30765	5.12626	0.0188385	0.137406	481	549	490	651	664	595
CG30101	2.22596	-0.345406	0.0188708	0.137569	3	1	7	46	7	2
Ets97D	0.281032	5.59551	0.0189086	0.137772	692	670	770	897	926	804
CG12321	0.281749	5.74273	0.0191146	0.139199	764	830	763	1001	1031	880
CG8735	0.269402	6.14968	0.0191329	0.13922	1051	1063	1029	1323	1398	1132
IA-2	1.98734	-1.57791	0.0191378	0.13922	3	0	1	5	3	9
CG11753	-0.339708	4.56802	0.0192471	0.139867	386	418	487	366	366	304
Chd64	-0.352257	8.44379	0.0192573	0.139867	5208	7415	6440	4573	5480	5066
Vps25	0.380033	4.5048	0.0192491	0.139867	324	356	278	450	481	343
CG3837	0.282831	5.94883	0.0193343	0.140209	897	856	970	1165	1102	1084
Fur1	0.321753	5.88101	0.0193318	0.140209	941	774	844	1308	1061	889
Mppe	0.306328	5.42058	0.0193349	0.140209	595	566	710	859	782	705
e	-2.11086	-1.76526	0.0194245	0.140784	4	5	5	1	1	1
bs	0.338298	5.02357	0.0195479	0.141555	520	465	414	669	569	557
CG7686	0.268352	6.9723	0.0195514	0.141555	1828	1954	1780	2229	2406	2159
CG5399	1.5713	-0.419964	0.0198285	0.143485	6	2	7	29	15	3
Arpc2	-0.276974	7.73313	0.0198899	0.143854	3673	3371	4376	3327	3297	2922
CG14417	-4.30748	-2.37557	0.0199893	0.144112	2	2	3	0	0	0
CG17650	-1.92263	-1.62291	0.0199539	0.144112	4	6	6	0	2	2
CG42863	0.32456	5.73933	0.019999	0.144112	897	674	746	1098	916	924
Cpr47Eb	-2.11111	-1.76529	0.0199481	0.144112	4	5	5	0	2	1
Cyp309a1	-4.30748	-2.37557	0.0199819	0.144112	2	2	3	0	0	0
Myo28B1	-4.30812	-2.37551	0.0199924	0.144112	3	2	2	0	0	0
nudE	-0.290552	6.18075	0.0199782	0.144112	1232	1213	1458	1073	1074	1075
CG31120	0.288565	6.03854	0.0200848	0.144282	974	982	932	1140	1371	1075
CG33110	4.287	-2.37598	0.0200861	0.144282	0	0	0	3	2	2
RpL7-like	0.268232	7.18414	0.0200627	0.144282	2007	2267	2171	2647	2920	2329
sut3	4.287	-2.37598	0.0200908	0.144282	0	0	0	3	2	2
Tl	0.285161	6.39362	0.020096	0.144282	1229	1124	1354	1723	1460	1395
tna	0.340602	7.88209	0.020036	0.144282	4213	3067	2897	4928	4371	3809
zf30C	0.253073	8.17698	0.0200787	0.144282	4265	4244	4406	5225	5648	4751
Aldh	-0.723843	5.92707	0.0202031	0.144975	647	1655	1390	444	908	894
Pex7	0.765359	0.536831	0.0202708	0.145385	10	21	17	24	31	28
aub	-0.717783	0.689249	0.0202838	0.145403	28	26	37	23	17	16
CG13917	-0.315265	7.20853	0.020353	0.145747	3054	2458	2506	2623	2008	1917
nau	1.14208	-0.119883	0.0203437	0.145747	12	7	5	30	17	8
CG42673	0.341723	5.85031	0.0203673	0.14577	949	858	673	1169	1053	973
pros	-1.33101	-0.537235	0.0203775	0.14577	21	6	13	9	5	2
CG2157	-0.675306	0.948006	0.0203904	0.145787	33	36	40	18	27	24
CG10311	0.458181	3.39508	0.0204074	0.145797	155	152	121	169	220	206
CG12163	0.23694	8.55901	0.020413	0.145797	5675	5527	5733	7255	7131	5909
CG9312	0.819961	3.04366	0.0205108	0.146419	116	64	107	281	159	83
CG12236	0.353579	4.85804	0.0205448	0.146585	462	421	356	581	509	515
CG8547	-0.353318	7.46387	0.0206117	0.146795	2748	3819	3093	2247	2805	2603
lost	-0.248476	9.88314	0.0206127	0.146795	15770	16541	17865	14655	14344	13745
Snp	0.401669	3.28113	0.0206169	0.146795	140	146	118	179	202	162
tsh	0.270789	8.42891	0.0206088	0.146795	5188	4582	5527	6959	6494	5312
CG13920	-0.427556	3.34607	0.0206281	0.146799	181	163	221	126	163	136
CG10068	-0.31409	5.23285	0.0206845	0.147124	620	620	796	565	584	510
alc	0.28479	5.78649	0.0207119	0.14713	827	838	762	1059	1064	885
Glut1	0.474457	5.52274	0.0207053	0.14713	771	475	635	1238	776	654
sec3	0.28278	6.22502	0.0207175	0.14713	1095	971	1236	1441	1477	1164
CG32103	-0.325025	5.87746	0.0207721	0.147442	1201	1041	948	1024	840	730
CG33795	1.03279	-0.356116	0.0208359	0.147819	6	11	4	17	12	15
CG11456	0.292508	5.17287	0.0208888	0.148118	489	513	580	676	702	589
CG8866	0.309643	4.62312	0.0209051	0.148157	357	359	355	474	474	401
CG7029	0.287737	6.21807	0.0209235	0.148211	1232	966	1079	1472	1367	1220
CG15747	0.290133	5.41824	0.0209918	0.148618	620	637	619	760	846	722
dpr12	-4.30629	-2.37567	0.0210101	0.148671	3	1	3	0	0	0
CG8006	-4.30628	-2.37567	0.0210224	0.148681	3	1	3	0	0	0
CG7294	-0.890808	1.16878	0.0210542	0.148753	33	71	31	18	31	25
cora	0.273902	9.41152	0.0210539	0.148753	11210	9660	9276	13214	11732	11947
ebd1	-0.54602	1.87482	0.0211743	0.149525	62	76	68	57	40	46
Drep-4	-0.29861	5.23356	0.0211932	0.149582	658	608	761	605	580	488
CG33116	0.261347	6.47958	0.0213159	0.150371	1315	1237	1417	1661	1651	1507
CG10077	0.242648	9.37052	0.0213376	0.150446	10466	9725	9458	12469	12196	10937
CG5435	0.369822	3.78728	0.0214443	0.151121	195	192	197	239	300	228
didum	-0.267124	6.92877	0.021496	0.151408	2396	1907	2208	1881	1927	1677
CG12042	-0.289753	4.98263	0.0215379	0.15159	566	562	567	501	491	417
CG13295	-0.349003	4.24139	0.0215438	0.15159	326	350	354	258	303	259
st	1.35657	-0.818269	0.0216232	0.15207	2	5	5	18	8	6
Lpin	0.31496	6.30323	0.0216428	0.15213	1215	1243	973	1409	1480	1435
CG11550	0.309289	4.98403	0.0217686	0.152936	427	454	497	644	559	529
bowl	0.252232	9.28768	0.0217892	0.153003	10222	8321	9385	12075	11413	10245
CG32199	-2.93377	-2.10013	0.0218646	0.153454	1	3	6	1	0	0
spi	0.254054	8.25712	0.0218794	0.15348	4448	4467	4735	5423	5883	5190
ft	0.280829	9.16211	0.0219546	0.153929	9725	7184	8424	11163	10122	9853
CG40191	0.261282	6.79057	0.0219827	0.153982	1516	1568	1842	2053	2081	1849
Tif-IA	-0.263823	7.39944	0.0219846	0.153982	2784	2870	3361	2612	2634	2361
CG10140	4.28018	-2.37651	0.0220234	0.154175	0	0	0	2	4	1
CG12096	0.272317	5.96061	0.0220385	0.154202	909	921	924	1174	1253	960
CG13157	-1.3162	-0.867028	0.0220669	0.154323	7	15	8	3	4	5
CG10462	0.294301	6.46378	0.0221419	0.154671	1221	1211	1446	1469	1727	1606
CG12992	-0.536911	1.6343	0.0221355	0.154671	54	57	62	48	38	35
dar1	-0.3874	3.82994	0.0221618	0.154671	256	235	292	238	206	165
yellow-e3	0.533941	3.71595	0.0221564	0.154671	120	202	198	205	300	257
Wsck	-0.265329	6.29041	0.022249	0.155201	1354	1444	1373	1212	1203	1105
Lcp65Af	-4.4849	-2.30175	0.0222699	0.155268	0	2	6	0	0	0
CG42395	1.76461	-1.49314	0.0223123	0.155389	3	1	1	4	5	9
MFS16	-0.256702	6.28583	0.0223324	0.155389	1390	1329	1432	1242	1248	1040
smt3	-0.254488	9.73195	0.022328	0.155389	13770	16090	15359	12807	14141	11585
whip	4.28733	-2.37595	0.0223145	0.155389	0	0	0	4	1	2
CG9335	-4.31159	-2.37524	0.0224087	0.155841	2	4	1	0	0	0
CG33267	0.604945	1.28984	0.0224572	0.156099	31	32	27	40	53	46
CG14757	-0.623987	1.69365	0.0224754	0.156147	47	70	68	44	31	46
CG33969	0.302654	5.01933	0.0224969	0.156217	438	464	514	580	658	535
rnh1	0.294808	5.50375	0.0225217	0.15631	594	665	730	892	865	723
Actn3	-4.48662	-2.30167	0.0225337	0.156315	6	0	2	0	0	0
disco-r	0.816164	2.38768	0.0227533	0.157679	95	31	55	153	100	73
Treh	-0.276448	6.44125	0.0227456	0.157679	1636	1372	1649	1457	1354	1099
tweek	-0.362665	7.20092	0.0228061	0.157965	3389	2165	2548	2531	1939	1918
R	-0.258525	8.21218	0.0229795	0.159006	4961	4999	5854	4582	4656	4155
Unc-115b	-0.265476	6.68486	0.0229781	0.159006	1962	1861	1660	1536	1605	1483
l(1)G0196	0.248048	6.70258	0.0230547	0.159446	1611	1478	1565	1951	1849	1795
CG4793	2.60401	-1.45715	0.023152	0.159958	1	0	2	16	5	0
Gbp	-2.39644	-1.92301	0.023147	0.159958	2	3	7	0	1	1
Flo-2	-0.314682	5.58474	0.0231685	0.159992	802	864	931	652	709	744
CG4496	0.323348	5.48055	0.0234108	0.161584	580	600	758	942	775	741
GlyP	-0.30058	7.98515	0.023446	0.161745	4435	5209	3998	3833	3785	3622
nst	-0.271807	6.36374	0.0234792	0.161894	1544	1415	1442	1414	1229	1065
CG9492	-1.55607	-1.30143	0.0235666	0.162334	10	5	6	3	2	2
Roc2	0.297852	5.73745	0.0235642	0.162334	671	770	897	982	1036	896
CG10907	-0.278101	5.33617	0.0236053	0.16247	685	695	781	604	629	572
RhoGAP92B	-0.281309	5.61534	0.0236101	0.16247	955	829	841	803	738	653
CG14441	0.400476	4.07099	0.0236368	0.162572	267	212	225	325	282	330
[truncated: 11,750 more rows]
